# Supplementary material for: Quantitative proteomic analysis of the tizoxanide effect in vero cells
Source: PubMed Central journal article supplement (PMC7477200; doi:10.1038/s41598-020-71634-2), 2020-09-07
Supplement: 41598_2020_71634_MOESM1_ESM.pdf [file 41598_2020_71634_MOESM1_ESM.pdf]

**Quantitative proteomic analysis of the tizoxanide effect in vero cells**

Yamamoto KA<sup>a</sup>; Blackburn K<sup>b</sup>; Migowski E<sup>c</sup>; Goshe M<sup>b</sup>; Brown DT<sup>b</sup>; Ferreira DF<sup>b,d</sup>; Soares MR<sup>a</sup>

Log(2) iBAQ Protein Abundance

| Vero | Vero | Vero | VeroTIZ | VeroTIZ | VeroTIZ | Fold Change<br>VeroTIZ/Vero | p-value | Protein<br>Accession | Protein Description                                                          |
|------|------|------|---------|---------|---------|-----------------------------|---------|----------------------|------------------------------------------------------------------------------|
| 19.5 | 19.8 | 19.5 | 16.9    | 17.3    | 17.2    | 0.0032                      | 0.0001  | gi 635042304         | nucleobindin-1                                                               |
| 20.6 | 20.9 | 20.5 | 18.7    | 18.2    | 18.3    | 0.0054                      | 0.0002  | gi 635145430         | nucleobindin-1-like                                                          |
| 18.9 | 19.2 | 18.2 | 15.0    | 15.1    | 15.4    | 0.0002                      | 0.0003  | gi 635092431         | eukaryotic translation initiation factor 1                                   |
| 19.5 | 19.5 | 19.5 | 19.7    | 19.8    | 19.7    | 1.6323                      | 0.0032  | gi 635060244         | isocitrate dehydrogenase [NADP] cytoplasmic                                  |
| 18.7 | 18.9 | 18.5 | 18.0    | 17.7    | 17.9    | 0.1451                      | 0.0037  | gi 635018899         | dolichyl-diphosphooligosaccharide--protein glycosyltransferase subunit STT3A |
| 14.4 | 15.0 | 14.0 | 16.0    | 16.3    | 16.4    | 56.1811                     | 0.0048  | gi 635040288         | trans-1,2-dihydrobenzene-1,2-diol dehydrogenase                              |
| 16.5 | 16.5 | 16.6 | 16.0    | 16.3    | 15.9    | 0.3502                      | 0.0161  | gi 635138256         | condensin complex subunit 3                                                  |
| 20.9 | 21.2 | 21.1 | 21.3    | 21.5    | 21.5    | 2.1521                      | 0.0218  | gi 635072330         | endoplasmic reticulum resident protein 44                                    |
| 12.0 | 13.9 | 12.2 | 15.2    | 14.4    | 15.8    | 252.6989                    | 0.0286  | gi 635050086         | WASH complex subunit strumpellin                                             |
| 20.0 | 19.9 | 20.1 | 20.1    | 20.2    | 20.2    | 1.6383                      | 0.0311  | gi 635113027         | protein transport protein Sec61 subunit gamma                                |
| 16.2 | 15.8 | 16.1 | 16.4    | 17.0    | 16.9    | 5.4736                      | 0.0321  | gi 635129660         | inverted formin-2 isoform X4                                                 |
| 24.6 | 25.0 | 24.8 | 24.3    | 24.4    | 24.5    | 0.3747                      | 0.0348  | gi 635045164         | 40S ribosomal protein S3a                                                    |
| 21.0 | 21.2 | 20.3 | 19.7    | 20.1    | 19.1    | 0.0605                      | 0.0370  | gi 635116140         | calumenin isoform X2                                                         |
| 18.1 | 18.1 | 17.9 | 17.4    | 17.6    | 17.8    | 0.3961                      | 0.0457  | gi 635089815         | retinoid-inducible serine carboxypeptidase isoform X2                        |
| 19.9 | 19.9 | 19.6 | 20.1    | 20.2    | 20.5    | 2.8380                      | 0.0470  | gi 635122798         | coatamer subunit gamma-1                                                     |
| 25.6 | 25.8 | 25.5 | 25.4    | 25.4    | 25.4    | 0.5875                      | 0.0498  | gi 635125337         | nucleophosmin isoform X1                                                     |
| 19.3 | 19.5 | 18.9 | 19.7    | 19.6    | 19.8    | 2.8046                      | 0.0576  | gi 635030501         | heat shock protein 75 kDa, mitochondrial                                     |
| 18.6 | 19.7 | 19.5 | 20.1    | 20.2    | 20.1    | 7.5649                      | 0.0637  | gi 635110205         | dnaJ homolog subfamily C member 8 isoform X2                                 |
| 17.9 | 18.3 | 18.3 | 18.5    | 18.6    | 19.0    | 3.2185                      | 0.0648  | gi 635060927         | aspartyl aminopeptidase isoform X3                                           |
| 20.6 | 20.6 | 20.4 | 20.2    | 20.3    | 20.3    | 0.6023                      | 0.0692  | gi 635090268         | septin-9 isoform X12                                                         |
| 16.5 | 16.3 | 15.5 | 17.1    | 17.0    | 16.7    | 6.4772                      | 0.0702  | gi 635022070         | ribosome-binding protein 1 isoform X4                                        |
| 25.5 | 25.6 | 25.7 | 26.0    | 26.0    | 25.7    | 2.0886                      | 0.0704  | gi 635082673         | 14-3-3 protein theta                                                         |
| 19.1 | 19.4 | 18.6 | 18.3    | 18.6    | 18.3    | 0.2478                      | 0.0705  | gi 635146182         | sterol-4-alpha-carboxylate 3-dehydrogenase, decarboxylating                  |
| 22.8 | 23.1 | 22.6 | 22.6    | 22.4    | 22.2    | 0.3295                      | 0.0709  | gi 635059421         | signal transducer and activator of transcription 1-alpha/beta                |
| 22.9 | 23.4 | 23.3 | 22.6    | 22.0    | 22.9    | 0.1943                      | 0.0709  | gi 635072639         | clathrin light chain A isoform X4                                            |
| 15.6 | 15.7 | 16.9 | 16.9    | 17.3    | 17.1    | 11.0768                     | 0.0710  | gi 635061114         | cullin-3 isoform X2                                                          |
| 18.4 | 18.8 | 18.5 | 17.1    | 18.0    | 18.1    | 0.1420                      | 0.0720  | gi 635014920         | nucleobindin-2 isoform X1                                                    |
| 21.4 | 22.0 | 21.5 | 21.0    | 21.2    | 21.0    | 0.2890                      | 0.0733  | gi 635014377         | reticulocalbin-1                                                             |
| 18.7 | 18.0 | 19.4 | 19.7    | 20.0    | 19.6    | 11.7622                     | 0.0772  | gi 635120107         | NEDD8-activating enzyme E1 catalytic subunit isoform X2                      |
| 17.3 | 14.3 | 12.9 | 17.6    | 17.8    | 18.1    | 981.2733                    | 0.0794  | gi 635078757         | eukaryotic translation initiation factor 5B isoform X2                       |
| 19.2 | 20.3 | 19.0 | 20.6    | 20.3    | 20.6    | 10.1858                     | 0.0795  | gi 635034151         | coactosin-like protein isoform X2                                            |
| 20.0 | 19.5 | 19.5 | 20.7    | 19.9    | 20.3    | 4.2761                      | 0.0801  | gi 635018123         | transgelin                                                                   |

|      |      |      |      |      |      |            |        |              |                                                            |
|------|------|------|------|------|------|------------|--------|--------------|------------------------------------------------------------|
| 18.6 | 18.6 | 18.8 | 17.9 | 18.4 | 18.5 | 0.3872     | 0.0823 | gi 635086677 | nucleoredoxin                                              |
| 16.4 | 18.0 | 17.7 | 18.5 | 18.6 | 18.4 | 12.7464    | 0.0831 | gi 635035330 | dual specificity mitogen-activated protein kinase kinase 2 |
| 19.8 | 20.2 | 19.7 | 19.7 | 17.6 | 17.7 | 0.0268     | 0.0841 | gi 635054464 | putative hexokinase HKDC1 isoform X4                       |
| 18.2 | 18.7 | 18.1 | 18.7 | 20.3 | 19.6 | 15.0106    | 0.0854 | gi 635075763 | 60S ribosomal protein L7a-like                             |
| 15.9 | 21.8 | 15.7 | 22.0 | 22.0 | 22.8 | 27588.1979 | 0.0921 | gi 635034811 | ATP synthase subunit delta, mitochondrial                  |
| 20.0 | 20.3 | 20.3 | 19.9 | 19.5 | 19.9 | 0.4102     | 0.0937 | gi 635042314 | protein arginine N-methyltransferase 1, partial            |
| 20.8 | 20.7 | 20.7 | 20.2 | 20.5 | 20.6 | 0.5095     | 0.0957 | gi 635139345 | eukaryotic translation initiation factor 4H isoform X2     |
| 22.4 | 22.3 | 22.2 | 21.9 | 22.2 | 22.1 | 0.5674     | 0.0995 | gi 635053631 | annexin A11                                                |
| 22.6 | 21.3 | 20.3 | 22.6 | 22.9 | 22.8 | 23.8933    | 0.1041 | gi 635034872 | 40S ribosomal protein S15 isoform X2                       |
| 18.9 | 19.0 | 18.6 | 18.1 | 18.8 | 18.1 | 0.2912     | 0.1091 | gi 635091531 | vesicle-fusing ATPase isoform X5                           |
| 23.4 | 23.6 | 23.3 | 23.6 | 24.1 | 23.7 | 2.2132     | 0.1100 | gi 635134796 | 60S acidic ribosomal protein P1                            |
| 18.6 | 19.1 | 18.5 | 19.0 | 19.2 | 19.5 | 3.2212     | 0.1101 | gi 635017047 | cysteine and histidine-rich domain-containing protein 1    |
| 23.9 | 24.1 | 23.9 | 23.1 | 23.6 | 23.8 | 0.3517     | 0.1139 | gi 635069752 | tubulin beta-4B chain                                      |
| 18.1 | 18.2 | 17.7 | 17.1 | 17.8 | 17.4 | 0.2930     | 0.1180 | gi 635083230 | serine/threonine-protein kinase OSR1 isoform X1            |
| 20.8 | 21.2 | 21.1 | 21.1 | 21.3 | 21.4 | 1.8129     | 0.1203 | gi 635012825 | 4F2 cell-surface antigen heavy chain isoform X2            |
| 18.3 | 18.1 | 17.2 | 16.6 | 17.2 | 17.3 | 0.1505     | 0.1214 | gi 635114870 | lanosterol 14-alpha demethylase isoform X2                 |
| 20.5 | 17.2 | 16.6 | 20.5 | 20.6 | 20.5 | 256.8207   | 0.1217 | gi 635105734 | rho-related GTP-binding protein RhoC                       |
| 24.6 | 24.8 | 24.6 | 24.8 | 24.8 | 24.9 | 1.4366     | 0.1222 | gi 635136214 | protein disulfide-isomerase A3                             |
| 24.3 | 24.7 | 24.3 | 24.2 | 24.3 | 24.2 | 0.5484     | 0.1263 | gi 635129403 | heat shock protein HSP 90-alpha                            |
| 23.7 | 24.3 | 24.0 | 23.8 | 23.3 | 23.6 | 0.3727     | 0.1291 | gi 635012066 | ras-related protein Rab-1B isoform X3                      |
| 20.7 | 21.6 | 22.3 | 22.4 | 22.3 | 22.8 | 8.7802     | 0.1292 | gi 635127763 | protein SET-like                                           |
| 15.8 | 15.5 | 18.6 | 17.4 | 20.3 | 19.6 | 324.7556   | 0.1338 | gi 635148575 | histone H3                                                 |
| 18.1 | 16.2 | 20.0 | 19.9 | 20.0 | 20.6 | 116.9033   | 0.1380 | gi 635034756 | basigin isoform X2                                         |
| 22.1 | 22.7 | 21.3 | 23.0 | 22.5 | 23.0 | 6.4805     | 0.1405 | gi 635037010 | 60S ribosomal protein L18a isoform X2                      |
| 18.8 | 17.5 | 17.8 | 17.0 | 17.6 | 17.0 | 0.1596     | 0.1437 | gi 635026378 | transmembrane 9 superfamily member 2                       |
| 18.3 | 17.7 | 20.3 | 15.1 | 14.8 | 18.6 | 0.0023     | 0.1446 | gi 635110699 | serine/arginine-rich splicing factor 10 isoform X8         |
| 17.8 | 16.0 | 21.7 | 21.4 | 21.5 | 21.6 | 1065.7533  | 0.1468 | gi 635097595 | tubulin beta-2B chain-like                                 |
| 23.1 | 23.1 | 22.9 | 23.1 | 23.3 | 23.3 | 1.4936     | 0.1505 | gi 635090086 | leucine-rich repeat-containing protein 59                  |
| 19.2 | 19.3 | 19.0 | 18.5 | 19.1 | 18.9 | 0.4622     | 0.1513 | gi 635014302 | caprin-1                                                   |
| 22.2 | 22.8 | 22.7 | 22.9 | 23.1 | 22.8 | 2.1787     | 0.1522 | gi 635118739 | transforming protein RhoA                                  |
| 19.0 | 19.0 | 18.7 | 19.0 | 19.5 | 19.3 | 2.1461     | 0.1523 | gi 635047589 | erlin-2 isoform X2                                         |
| 14.2 | 14.2 | 13.8 | 15.6 | 15.7 | 13.9 | 10.6143    | 0.1526 | gi 635050183 | protein EFR3 homolog A isoform X4                          |
| 20.3 | 21.0 | 20.4 | 20.1 | 20.4 | 19.8 | 0.3249     | 0.1535 | gi 635091792 | glial fibrillary acidic protein isoform X3                 |
| 24.8 | 25.2 | 24.9 | 25.1 | 25.3 | 25.2 | 1.6239     | 0.1575 | gi 635117111 | protein disulfide-isomerase A4                             |
| 20.9 | 21.1 | 20.6 | 20.9 | 21.4 | 21.7 | 2.9523     | 0.1583 | gi 635084397 | translocon-associated protein subunit gamma                |
| 21.1 | 20.9 | 20.5 | 21.2 | 21.2 | 21.1 | 2.0758     | 0.1619 | gi 635013758 | rho GTPase-activating protein 1 isoform X3                 |
| 22.3 | 22.8 | 22.3 | 22.1 | 22.1 | 22.2 | 0.5210     | 0.1628 | gi 635015804 | stress-induced-phosphoprotein 1                            |
| 22.1 | 22.4 | 22.0 | 22.2 | 22.9 | 22.6 | 2.4937     | 0.1644 | gi 635098341 | protein ERGIC-53 isoform X2                                |
| 15.0 | 20.8 | 14.2 | 20.4 | 20.5 | 19.9 | 3712.8437  | 0.1645 | gi 635026932 | [Protein ADP-ribosylarginine] hydrolase-like protein 1     |
| 16.0 | 17.4 | 16.8 | 17.3 | 17.5 | 17.6 | 5.1127     | 0.1652 | gi 635079776 | mannosyl-oligosaccharide glucosidase                       |
| 18.1 | 18.6 | 17.9 | 17.6 | 17.7 | 15.5 | 0.0533     | 0.1675 | gi 635034083 | heat shock factor-binding protein 1                        |

|      |      |      |      |      |      |        |        |              |                                                                              |
|------|------|------|------|------|------|--------|--------|--------------|------------------------------------------------------------------------------|
| 22.0 | 22.1 | 22.0 | 21.6 | 21.9 | 22.0 | 0.6618 | 0.1685 | gi 635052960 | heterogeneous nuclear ribonucleoprotein F                                    |
| 17.6 | 19.0 | 18.3 | 19.3 | 19.2 | 18.6 | 5.3779 | 0.1697 | gi 635030885 | eukaryotic peptide chain release factor GTP-binding subunit ERF3A isoform X3 |
| 21.8 | 22.7 | 22.2 | 22.0 | 21.8 | 21.5 | 0.3159 | 0.1705 | gi 635128197 | transmembrane emp24 domain-containing protein 10                             |
| 21.3 | 21.3 | 21.4 | 21.7 | 21.3 | 21.8 | 1.9244 | 0.1746 | gi 635103547 | prefoldin subunit 2                                                          |
| 22.9 | 22.4 | 22.5 | 22.1 | 22.4 | 22.5 | 0.5088 | 0.1793 | gi 635014587 | copper transport protein ATOX1                                               |
| 20.9 | 21.2 | 22.3 | 20.9 | 20.2 | 20.9 | 0.1577 | 0.1816 | gi 635060556 | 60S ribosomal protein L37a                                                   |
| 21.0 | 20.8 | 20.2 | 20.8 | 21.4 | 21.2 | 2.8329 | 0.1847 | gi 635044167 | hydroxyacyl-coenzyme A dehydrogenase, mitochondrial                          |
| 18.4 | 18.6 | 17.8 | 18.5 | 18.6 | 19.0 | 2.7471 | 0.1879 | gi 635107620 | phosphoglucomutase-1 isoform X2                                              |
| 20.3 | 20.8 | 20.6 | 20.2 | 20.5 | 20.2 | 0.5530 | 0.1885 | gi 635044101 | inorganic pyrophosphatase 2, mitochondrial isoform X2                        |
| 19.8 | 19.7 | 19.6 | 19.7 | 20.1 | 19.9 | 1.5928 | 0.1895 | gi 635011423 | cysteine--tRNA ligase, cytoplasmic isoform X3                                |
| 21.7 | 22.1 | 21.4 | 21.9 | 22.3 | 22.1 | 2.2310 | 0.1929 | gi 635147267 | acidic leucine-rich nuclear phosphoprotein 32 family member E isoform X3     |
| 22.1 | 22.1 | 21.8 | 22.0 | 22.2 | 22.2 | 1.5217 | 0.1950 | gi 635134195 | electron transfer flavoprotein subunit alpha, mitochondrial isoform X1       |
| 20.6 | 20.7 | 20.1 | 21.0 | 20.8 | 20.6 | 2.0703 | 0.1972 | gi 635066390 | dynactin subunit 2 isoform X5                                                |
| 24.1 | 24.7 | 24.2 | 23.0 | 24.4 | 23.6 | 0.2033 | 0.2003 | gi 635040463 | 60S ribosomal protein L13a isoform X2                                        |
| 21.5 | 21.9 | 22.0 | 22.1 | 21.9 | 22.1 | 1.7095 | 0.2029 | gi 635111099 | F-actin-capping protein subunit beta isoform X4                              |
| 21.7 | 21.4 | 21.4 | 21.1 | 21.4 | 21.4 | 0.6001 | 0.2065 | gi 635106454 | calponin-3 isoform X4                                                        |
| 20.2 | 20.6 | 20.3 | 20.1 | 20.3 | 20.1 | 0.6175 | 0.2088 | gi 635109727 | tyrosine--tRNA ligase, cytoplasmic                                           |
| 23.5 | 23.8 | 23.5 | 23.7 | 24.0 | 23.8 | 1.6398 | 0.2094 | gi 635011037 | transaldolase                                                                |
| 18.0 | 18.3 | 17.6 | 18.1 | 18.6 | 18.4 | 2.3503 | 0.2095 | gi 635131842 | ubiquitin carboxyl-terminal hydrolase isozyme L5 isoform X8                  |
| 21.0 | 21.5 | 21.8 | 22.3 | 21.7 | 21.7 | 2.8395 | 0.2098 | gi 635118889 | guanine nucleotide-binding protein G(i) subunit alpha-2                      |
| 17.7 | 17.3 | 17.0 | 17.3 | 18.0 | 18.2 | 3.1381 | 0.2123 | gi 635069658 | 39S ribosomal protein L41, mitochondrial                                     |
| 24.3 | 23.8 | 24.2 | 24.3 | 24.2 | 24.4 | 1.7292 | 0.2143 | gi 635111446 | EF-hand domain-containing protein D2                                         |
| 26.1 | 26.4 | 25.8 | 26.3 | 26.5 | 26.3 | 1.8307 | 0.2153 | gi 635074114 | annexin A1                                                                   |
| 15.8 | 16.3 | 15.5 | 15.8 | 17.2 | 16.5 | 4.4677 | 0.2170 | gi 635061470 | COP9 signalosome complex subunit 7b isoform X3                               |
| 20.6 | 20.9 | 21.1 | 20.7 | 20.6 | 20.0 | 0.4100 | 0.2185 | gi 635104778 | protein S100-A13                                                             |
| 21.5 | 21.7 | 21.2 | 21.2 | 21.3 | 21.2 | 0.6089 | 0.2192 | gi 635036959 | 6-phosphogluconolactonase isoform X1                                         |
| 21.5 | 21.5 | 21.3 | 21.1 | 21.4 | 21.3 | 0.6967 | 0.2267 | gi 635069550 | keratin, type I cytoskeletal 18                                              |
| 23.1 | 23.5 | 23.3 | 23.0 | 23.1 | 23.2 | 0.6294 | 0.2271 | gi 635144600 | signal recognition particle 14 kDa protein-like                              |
| 20.7 | 20.4 | 19.9 | 20.1 | 21.6 | 21.7 | 6.8070 | 0.2296 | gi 635092278 | polymerase I and transcript release factor                                   |
| 18.7 | 18.7 | 18.3 | 18.5 | 19.1 | 19.0 | 2.0343 | 0.2297 | gi 635131548 | importin-9 isoform X1                                                        |
| 17.3 | 16.2 | 15.9 | 17.2 | 17.9 | 16.6 | 5.7934 | 0.2335 | gi 635063151 | ribosomal RNA small subunit methyltransferase NEP1                           |
| 26.6 | 26.9 | 26.6 | 26.8 | 26.9 | 27.1 | 1.5717 | 0.2345 | gi 635087149 | profilin-1                                                                   |
| 18.0 | 17.7 | 17.9 | 17.6 | 17.8 | 17.6 | 0.6545 | 0.2350 | gi 635071600 | 26S proteasome non-ATPase regulatory subunit 5 isoform X2                    |
| 18.3 | 17.5 | 16.7 | 18.1 | 18.6 | 18.0 | 5.3258 | 0.2352 | gi 635136416 | EH domain-containing protein 4                                               |
| 17.1 | 17.0 | 17.0 | 17.3 | 18.1 | 17.0 | 2.8737 | 0.2354 | gi 635122371 | omega-amidase NIT2 isoform X2                                                |
| 18.8 | 19.3 | 18.6 | 19.0 | 19.4 | 19.3 | 2.1642 | 0.2361 | gi 635115571 | dihydrolipoyl dehydrogenase, mitochondrial                                   |
| 17.3 | 18.1 | 17.9 | 17.8 | 16.4 | 17.1 | 0.2237 | 0.2382 | gi 635089252 | TATA-binding protein-associated factor 2N isoform X2                         |
| 16.7 | 16.5 | 16.0 | 16.7 | 17.2 | 16.5 | 2.4208 | 0.2383 | gi 635043866 | rap1 GTPase-GDP dissociation stimulator 1 isoform X6                         |
| 17.1 | 17.1 | 16.5 | 16.6 | 16.7 | 16.6 | 0.5032 | 0.2409 | gi 635090518 | integrin beta-4 isoform X4                                                   |
| 17.9 | 18.3 | 18.4 | 18.3 | 18.5 | 18.5 | 1.6819 | 0.2418 | gi 635112211 | leucine-rich repeat-containing protein 47                                    |
| 19.8 | 19.3 | 19.1 | 19.7 | 19.7 | 19.9 | 1.9884 | 0.2419 | gi 635111691 | spermidine synthase                                                          |

|      |      |      |      |      |      |          |        |               |                                                                         |
|------|------|------|------|------|------|----------|--------|---------------|-------------------------------------------------------------------------|
| 16.2 | 16.2 | 16.1 | 15.7 | 16.3 | 15.8 | 0.5801   | 0.2430 | gi 635036075  | dynamain-2 isoform X8                                                   |
| 17.8 | 18.3 | 17.9 | 17.5 | 17.9 | 17.7 | 0.5643   | 0.2430 | gi 635016095  | nuclear mitotic apparatus protein 1 isoform X2                          |
| 18.0 | 17.8 | 17.0 | 17.4 | 17.0 | 17.1 | 0.3543   | 0.2431 | gi 635048513  | COP9 signalosome complex subunit 5                                      |
| 23.5 | 23.7 | 23.7 | 23.8 | 23.7 | 23.8 | 1.3451   | 0.2446 | gi 635127077  | galectin-3                                                              |
| 19.9 | 20.1 | 20.3 | 20.4 | 20.4 | 20.1 | 1.6693   | 0.2483 | gi 635092051  | dual specificity protein phosphatase 3                                  |
| 16.6 | 15.8 | 14.0 | 13.0 | 15.4 | 13.6 | 0.0367   | 0.2514 | gi 635101418  | THO complex subunit 5 homolog isoform X2                                |
| 18.0 | 18.3 | 18.3 | 18.2 | 18.7 | 18.3 | 1.6729   | 0.2528 | gi 635116062  | ADP-ribosylation factor 5                                               |
| 23.6 | 23.2 | 23.2 | 23.0 | 23.3 | 23.0 | 0.5799   | 0.2530 | gi 635050673  | elongation factor 1-delta isoform X7                                    |
| 18.8 | 19.5 | 18.7 | 17.5 | 19.2 | 18.2 | 0.1843   | 0.2549 | gi 635138937  | LETM1 and EF-hand domain-containing protein 1, mitochondrial isoform X4 |
| 14.8 | 17.9 | 18.4 | 19.5 | 17.8 | 18.9 | 43.3531  | 0.2556 | gi 635035969  | eukaryotic translation initiation factor 3 subunit G                    |
| 21.5 | 20.3 | 20.1 | 20.9 | 21.3 | 21.7 | 5.0210   | 0.2557 | gi 635108906  | solute carrier family 2, facilitated glucose transporter member 1       |
| 16.6 | 16.5 | 17.0 | 15.2 | 16.1 | 16.9 | 0.2026   | 0.2558 | gi 635077640  | nesprin-1 isoform X17                                                   |
| 23.8 | 24.7 | 24.3 | 23.6 | 24.0 | 24.1 | 0.3970   | 0.2573 | gi 635057447  | acyl-CoA-binding protein isoform X2                                     |
| 20.5 | 14.7 | 20.9 | 21.3 | 21.2 | 21.4 | 415.3555 | 0.2577 | gi 635143551  | proteolipid protein 2                                                   |
| 20.2 | 20.8 | 20.7 | 20.2 | 20.2 | 20.4 | 0.5367   | 0.2596 | gi 635132961  | 4-trimethylaminobutyraldehyde dehydrogenase                             |
| 21.7 | 21.8 | 21.4 | 21.2 | 21.5 | 21.6 | 0.6145   | 0.2598 | gi 635131556  | cysteine and glycine-rich protein 1 isoform X2                          |
| 22.7 | 22.2 | 22.1 | 21.9 | 22.3 | 22.1 | 0.5207   | 0.2603 | gi 635020096  | prefoldin subunit 4                                                     |
| 22.5 | 23.0 | 22.3 | 22.1 | 22.4 | 22.4 | 0.5095   | 0.2607 | gi 635058086  | D-dopachrome decarboxylase                                              |
| 22.0 | 22.9 | 22.9 | 22.3 | 22.2 | 22.1 | 0.3941   | 0.2614 | gi 635092753  | 60S ribosomal protein L19                                               |
| 21.6 | 21.0 | 20.5 | 21.4 | 21.5 | 21.6 | 2.6554   | 0.2626 | gi 635104150  | NAD(P)H-hydrate epimerase                                               |
| 22.6 | 22.6 | 22.4 | 22.4 | 22.4 | 22.5 | 0.7727   | 0.2632 | gi 635054259  | prosaposin isoform X3                                                   |
| 24.6 | 25.0 | 24.8 | 24.8 | 25.2 | 24.9 | 1.5241   | 0.2637 | gi 635100200  | 60S ribosomal protein L12                                               |
| 25.4 | 25.7 | 25.4 | 25.4 | 26.1 | 25.9 | 1.8909   | 0.2650 | gi 635135688  | 60S ribosomal protein L18                                               |
| 18.5 | 18.8 | 18.2 | 14.9 | 18.2 | 18.1 | 0.0380   | 0.2665 | gi 635089753  | 28S ribosomal protein S23, mitochondrial                                |
| 24.2 | 24.8 | 24.7 | 25.0 | 24.6 | 24.9 | 1.7909   | 0.2672 | gi 635041348  | 40S ribosomal protein S9                                                |
| 15.9 | 14.6 | 12.7 | 11.8 | 14.4 | 12.2 | 0.0261   | 0.2672 | gi 635129357  | retrotransposon-like protein 1                                          |
| 21.7 | 22.9 | 22.4 | 22.5 | 21.4 | 19.4 | 0.0584   | 0.2680 | gi 635044058  | ubiquitin-conjugating enzyme E2 D3 isoform X1                           |
| 19.8 | 20.8 | 19.7 | 19.4 | 16.5 | 20.1 | 0.0333   | 0.2682 | gi 635104100  | hepatoma-derived growth factor isoform X2                               |
| 22.2 | 22.6 | 22.2 | 22.1 | 22.2 | 22.0 | 0.5967   | 0.2684 | gi 635072111  | UV excision repair protein RAD23 homolog B                              |
| 19.7 | 20.1 | 19.5 | 19.5 | 19.7 | 18.1 | 0.2061   | 0.2692 | gi 635021686  | microtubule-associated protein RP/EB family member 1 isoform X2         |
| 21.8 | 21.2 | 20.7 | 21.3 | 21.8 | 22.1 | 3.1362   | 0.2693 | gi 635070315  | surfeit locus protein 4                                                 |
| 20.3 | 19.3 | 15.0 | 19.9 | 20.5 | 20.3 | 121.2570 | 0.2712 | gi 635114566  | NADH dehydrogenase [ubiquinone] 1 alpha subcomplex subunit 4            |
| 19.1 | 20.5 | 19.7 | 19.6 | 19.2 | 18.8 | 0.2598   | 0.2716 | gi 635101349  | RNA-binding protein EWS isoform X4                                      |
| 18.7 | 19.3 | 17.7 | 18.9 | 19.5 | 19.2 | 4.2529   | 0.2721 | gi 635085400  | U8 snoRNA-decapping enzyme                                              |
| 23.0 | 22.7 | 23.0 | 22.5 | 22.7 | 22.9 | 0.5992   | 0.2724 | gi 635014320  | CD59 glycoprotein isoform X2                                            |
| 18.4 | 18.3 | 18.1 | 17.9 | 18.3 | 17.1 | 0.3429   | 0.2726 | gi 635135615  | E3 ubiquitin-protein ligase NEDD4 isoform X3                            |
| 19.6 | 19.9 | 19.7 | 19.6 | 20.2 | 20.2 | 1.8636   | 0.2726 | gi 635022518  | casein kinase II subunit alpha isoform X1                               |
| 18.0 | 18.1 | 17.8 | 17.7 | 18.0 | 17.8 | 0.7321   | 0.2728 | gi 635050651  | nicotinate phosphoribosyltransferase isoform X4                         |
| 16.6 | 16.5 | 16.4 | 16.5 | 17.2 | 16.7 | 1.9584   | 0.2729 | REV__gi 63502 | multidrug resistance-associated protein 4 isoform X4                    |
| 19.3 | 21.2 | 20.9 | 19.7 | 20.3 | 16.5 | 0.0220   | 0.2767 | gi 635035808  | 40S ribosomal protein S28                                               |
| 22.3 | 21.8 | 21.8 | 21.9 | 21.7 | 21.7 | 0.6226   | 0.2768 | gi 635019970  | vesicle-associated membrane protein-associated protein B/C isoform X3   |

|      |      |      |      |      |      |         |        |              |                                                                                                                     |
|------|------|------|------|------|------|---------|--------|--------------|---------------------------------------------------------------------------------------------------------------------|
| 17.3 | 16.8 | 16.3 | 16.9 | 17.3 | 17.5 | 2.7873  | 0.2772 | gi 635021303 | DDRGK domain-containing protein 1 isoform X2                                                                        |
| 19.1 | 18.7 | 18.5 | 19.4 | 18.8 | 19.1 | 2.0394  | 0.2779 | gi 635094303 | BAG family molecular chaperone regulator 2                                                                          |
| 22.0 | 21.9 | 21.9 | 21.8 | 22.1 | 22.4 | 1.6214  | 0.2785 | gi 635093115 | prohibitin                                                                                                          |
| 21.3 | 21.2 | 20.8 | 21.3 | 21.4 | 21.2 | 1.5801  | 0.2788 | gi 635011196 | cathepsin D                                                                                                         |
| 17.3 | 17.9 | 17.1 | 18.0 | 17.7 | 17.6 | 2.2415  | 0.2801 | gi 635077547 | A-kinase anchor protein 12 isoform X3                                                                               |
| 17.2 | 16.8 | 16.7 | 14.4 | 15.6 | 17.4 | 0.0800  | 0.2808 | gi 635085230 | propionyl-CoA carboxylase beta chain, mitochondrial                                                                 |
| 21.1 | 21.2 | 20.5 | 19.9 | 20.9 | 20.6 | 0.3400  | 0.2827 | gi 635071935 | hydroxysteroid dehydrogenase-like protein 2 isoform X2                                                              |
| 19.6 | 20.0 | 19.7 | 19.3 | 19.8 | 19.3 | 0.5157  | 0.2844 | gi 635118673 | glutamine--tRNA ligase isoform X2                                                                                   |
| 26.0 | 25.9 | 25.5 | 26.1 | 26.0 | 25.9 | 1.6015  | 0.2846 | gi 635031686 | fructose-bisphosphate aldolase A isoform X2                                                                         |
| 20.9 | 16.7 | 21.4 | 21.2 | 21.7 | 21.5 | 65.9331 | 0.2902 | gi 635065838 | coatamer subunit zeta-1                                                                                             |
| 24.4 | 24.5 | 24.0 | 24.4 | 24.6 | 24.4 | 1.5074  | 0.2907 | gi 635110599 | chloride intracellular channel protein 4                                                                            |
| 20.1 | 20.7 | 20.2 | 19.8 | 20.3 | 20.1 | 0.5172  | 0.2933 | gi 635065535 | eukaryotic translation initiation factor 4B isoform X2                                                              |
| 18.8 | 19.1 | 18.9 | 15.4 | 18.6 | 18.8 | 0.0443  | 0.2947 | gi 635108952 | peptidyl-prolyl cis-trans isomerase H                                                                               |
| 20.7 | 21.1 | 20.7 | 20.3 | 20.8 | 20.6 | 0.5535  | 0.2957 | gi 635058271 | 26S proteasome non-ATPase regulatory subunit 14                                                                     |
| 19.0 | 20.8 | 19.5 | 20.3 | 18.1 | 15.5 | 0.0166  | 0.2970 | gi 635067409 | small nuclear ribonucleoprotein F                                                                                   |
| 19.3 | 20.5 | 19.5 | 14.6 | 18.8 | 19.9 | 0.0101  | 0.2978 | gi 635111930 | vesicle-associated membrane protein 3 isoform X2                                                                    |
| 18.5 | 18.3 | 18.0 | 18.3 | 18.7 | 18.4 | 1.7714  | 0.2984 | gi 635089821 | E3 ubiquitin/ISG15 ligase TRIM25                                                                                    |
| 19.0 | 19.2 | 18.2 | 18.3 | 20.2 | 20.7 | 8.9281  | 0.2992 | gi 635040573 | nuclear pore glycoprotein p62                                                                                       |
| 19.9 | 19.8 | 18.4 | 18.8 | 18.7 | 19.0 | 0.2637  | 0.3012 | gi 635084003 | translocation protein SEC62                                                                                         |
| 21.5 | 22.2 | 20.7 | 22.1 | 22.3 | 21.7 | 3.5939  | 0.3017 | gi 635046265 | heat shock protein HSP 90-alpha-like                                                                                |
| 17.9 | 16.9 | 16.2 | 17.4 | 18.2 | 17.5 | 4.9132  | 0.3026 | gi 635034390 | adenine phosphoribosyltransferase isoform X1                                                                        |
| 19.1 | 18.4 | 18.1 | 18.6 | 18.9 | 19.4 | 2.7237  | 0.3053 | gi 635126957 | UPF0568 protein C14orf166 homolog                                                                                   |
| 22.3 | 22.2 | 21.8 | 22.1 | 22.4 | 22.5 | 1.7155  | 0.3056 | gi 635057512 | actin-related protein 3 isoform X2                                                                                  |
| 24.1 | 24.6 | 24.5 | 23.7 | 24.5 | 24.0 | 0.4746  | 0.3069 | gi 635098791 | 60S ribosomal protein L17                                                                                           |
| 23.6 | 23.3 | 23.2 | 23.5 | 23.6 | 23.4 | 1.3960  | 0.3078 | gi 635110833 | cell division control protein 42 homolog isoform X1                                                                 |
| 21.5 | 22.1 | 22.1 | 22.4 | 21.9 | 22.3 | 1.9167  | 0.3088 | gi 635140119 | ras-related C3 botulinum toxin substrate 1 isoform X2                                                               |
| 22.1 | 22.2 | 21.4 | 22.1 | 22.3 | 22.2 | 1.9392  | 0.3102 | gi 635095793 | protein CutA isoform X2                                                                                             |
| 19.4 | 17.5 | 18.7 | 18.8 | 19.4 | 19.4 | 4.8089  | 0.3109 | gi 635141553 | DNA-(apurinic or apyrimidinic site) lyase                                                                           |
| 24.6 | 24.1 | 24.8 | 25.5 | 25.0 | 24.4 | 2.9061  | 0.3122 | gi 635042167 | 40S ribosomal protein S5                                                                                            |
| 16.7 | 16.7 | 16.4 | 16.5 | 16.0 | 16.6 | 0.5514  | 0.3123 | gi 635077891 | cation-independent mannose-6-phosphate receptor                                                                     |
| 25.0 | 25.0 | 24.1 | 25.0 | 25.3 | 24.9 | 2.4597  | 0.3128 | gi 635069251 | GTP-binding nuclear protein Ran isoform X1                                                                          |
| 16.6 | 16.2 | 15.5 | 16.2 | 16.7 | 16.5 | 2.4114  | 0.3133 | gi 635032399 | alpha-ketoglutarate-dependent dioxygenase FTO isoform X2                                                            |
| 14.5 | 14.2 | 14.3 | 13.7 | 14.0 | 14.4 | 0.5344  | 0.3138 | gi 635139626 | neurosecretory protein VGF                                                                                          |
| 17.2 | 16.7 | 17.4 | 17.6 | 17.4 | 17.2 | 1.8172  | 0.3155 | gi 635112882 | procollagen-lysine,2-oxoglutarate 5-dioxygenase 1                                                                   |
| 23.4 | 23.9 | 23.3 | 23.6 | 23.9 | 23.9 | 1.7767  | 0.3173 | gi 635012352 | ubiquitin-like protein ubi and ribosomal protein S30                                                                |
| 20.6 | 19.6 | 20.3 | 20.3 | 18.3 | 19.6 | 0.1741  | 0.3177 | gi 635123623 | voltage-dependent anion-selective channel protein 1 isoform X2                                                      |
| 17.2 | 16.5 | 15.9 | 16.5 | 17.4 | 17.3 | 3.4787  | 0.3217 | gi 635094723 | cell division cycle 5-like protein                                                                                  |
| 18.2 | 15.5 | 18.5 | 18.2 | 18.6 | 18.8 | 12.2777 | 0.3234 | gi 635090645 | peptidyl-tRNA hydrolase ICT1, mitochondrial                                                                         |
| 18.1 | 16.5 | 17.5 | 17.7 | 17.8 | 18.2 | 3.4656  | 0.3239 | gi 635017822 | dihydrolipoyllysine-residue acetyltransferase component of pyruvate dehydrogenase complex, mitochondrial isoform X3 |
| 23.6 | 23.8 | 24.1 | 23.2 | 23.4 | 24.0 | 0.4863  | 0.3241 | gi 635100971 | macrophage migration inhibitory factor                                                                              |
| 22.6 | 23.4 | 23.3 | 23.2 | 23.6 | 23.3 | 1.9657  | 0.3243 | gi 635033325 | NAD(P)H dehydrogenase [quinone] 1                                                                                   |

|      |      |      |      |      |      |         |        |              |                                                                                             |
|------|------|------|------|------|------|---------|--------|--------------|---------------------------------------------------------------------------------------------|
| 16.4 | 16.8 | 16.8 | 16.6 | 15.7 | 16.6 | 0.4421  | 0.3256 | gi 635101518 | splicing factor 3A subunit 1                                                                |
| 20.0 | 20.5 | 19.9 | 19.8 | 20.1 | 19.7 | 0.5804  | 0.3281 | gi 635079570 | macrophage-capping protein                                                                  |
| 17.9 | 17.9 | 17.4 | 17.8 | 18.1 | 17.9 | 1.6232  | 0.3284 | gi 635048956 | carbonic anhydrase 2                                                                        |
| 18.6 | 19.3 | 18.6 | 18.8 | 19.5 | 19.2 | 2.1398  | 0.3293 | gi 635057688 | DNA replication licensing factor MCM6                                                       |
| 22.4 | 22.6 | 22.4 | 22.3 | 22.0 | 22.6 | 0.6493  | 0.3296 | gi 635141002 | isocitrate dehydrogenase [NADP], mitochondrial isoform X1                                   |
| 25.3 | 25.5 | 25.1 | 25.3 | 25.7 | 25.5 | 1.5445  | 0.3298 | gi 635063102 | triosephosphate isomerase                                                                   |
| 23.0 | 24.1 | 23.1 | 24.1 | 23.8 | 23.5 | 2.6287  | 0.3299 | gi 635085736 | 60S ribosomal protein L15                                                                   |
| 21.2 | 21.7 | 21.1 | 20.7 | 21.6 | 17.3 | 0.0340  | 0.3314 | gi 635012608 | protein phosphatase 1 regulatory subunit 14B                                                |
| 18.0 | 18.4 | 17.6 | 15.5 | 18.0 | 17.7 | 0.1154  | 0.3343 | gi 635023881 | 6-phosphofructokinase, liver type                                                           |
| 22.1 | 21.7 | 21.5 | 21.3 | 21.4 | 21.8 | 0.5575  | 0.3346 | gi 635093916 | cytochrome c oxidase subunit 7A2, mitochondrial                                             |
| 15.8 | 14.8 | 14.2 | 13.9 | 14.8 | 14.4 | 0.2682  | 0.3358 | gi 635017740 | serine/threonine-protein phosphatase 2A 65 kDa regulatory subunit A beta isoform isoform X6 |
| 17.9 | 19.1 | 15.3 | 19.0 | 18.4 | 18.6 | 17.0817 | 0.3360 | gi 635063793 | serine-threonine kinase receptor-associated protein                                         |
| 15.5 | 19.9 | 19.1 | 19.3 | 20.0 | 19.7 | 32.1265 | 0.3361 | gi 635032645 | anamorsin                                                                                   |
| 20.0 | 19.9 | 19.1 | 19.7 | 20.1 | 20.1 | 2.2093  | 0.3374 | gi 635073162 | cytoplasmic aconitate hydratase                                                             |
| 22.1 | 22.5 | 22.1 | 22.4 | 22.5 | 22.3 | 1.4454  | 0.3388 | gi 635067826 | cytoskeleton-associated protein 4                                                           |
| 22.0 | 22.2 | 22.4 | 21.9 | 22.3 | 21.7 | 0.5904  | 0.3396 | gi 635095400 | lactoylglutathione lyase                                                                    |
| 22.0 | 21.2 | 21.5 | 20.9 | 21.2 | 21.6 | 0.4573  | 0.3401 | gi 635035063 | tubulin-specific chaperone A                                                                |
| 19.6 | 19.9 | 19.5 | 19.5 | 20.3 | 20.1 | 1.8870  | 0.3413 | gi 635126637 | protein transport protein Sec23A isoform X3                                                 |
| 15.7 | 15.9 | 15.4 | 17.6 | 15.9 | 15.6 | 4.8211  | 0.3421 | gi 635048161 | V-type proton ATPase subunit H isoform X3                                                   |
| 18.7 | 18.1 | 17.7 | 18.5 | 18.2 | 18.7 | 2.2160  | 0.3437 | gi 635090597 | 28S ribosomal protein S7, mitochondrial                                                     |
| 20.4 | 20.7 | 20.0 | 20.2 | 20.4 | 18.4 | 0.1999  | 0.3440 | gi 635105817 | methylosome protein 50                                                                      |
| 18.2 | 18.0 | 17.1 | 18.0 | 18.1 | 18.4 | 2.4461  | 0.3447 | gi 635027992 | UPF0600 protein C5orf51 homolog isoform X2                                                  |
| 20.0 | 19.9 | 19.5 | 19.3 | 19.8 | 19.5 | 0.5764  | 0.3460 | gi 635110721 | hydroxymethylglutaryl-CoA lyase, mitochondrial isoform X5                                   |
| 17.4 | 18.0 | 17.4 | 17.5 | 18.3 | 17.9 | 2.1300  | 0.3482 | gi 635097347 | transmembrane protein 14C                                                                   |
| 15.5 | 20.9 | 20.5 | 21.0 | 20.7 | 20.8 | 69.7483 | 0.3490 | gi 635021824 | microtubule-associated proteins 1A/1B light chain 3A isoform X2                             |
| 22.6 | 23.4 | 23.1 | 23.1 | 23.3 | 23.6 | 1.9805  | 0.3498 | gi 635101104 | small nuclear ribonucleoprotein Sm D3                                                       |
| 17.4 | 19.7 | 15.3 | 17.4 | 20.9 | 19.3 | 52.1427 | 0.3498 | gi 635143942 | histone H3.3-like                                                                           |
| 16.1 | 16.4 | 15.5 | 15.5 | 15.8 | 15.9 | 0.5060  | 0.3513 | gi 635012833 | nuclear RNA export factor 1                                                                 |
| 17.5 | 18.1 | 17.5 | 17.9 | 18.6 | 17.6 | 2.3668  | 0.3515 | gi 635116076 | staphylococcal nuclease domain-containing protein 1                                         |
| 15.3 | 18.3 | 17.3 | 17.5 | 18.2 | 18.0 | 8.9543  | 0.3515 | gi 635055157 | X-ray repair cross-complementing protein 6-like                                             |
| 19.3 | 19.2 | 19.4 | 19.0 | 19.4 | 14.9 | 0.0309  | 0.3519 | gi 635012404 | ADP-ribosylation factor-like protein 2 isoform X2                                           |
| 18.8 | 18.2 | 18.3 | 18.5 | 18.5 | 19.0 | 1.8177  | 0.3529 | gi 635142634 | pyruvate dehydrogenase E1 component subunit alpha, somatic form, mitochondrial isoform X1   |
| 23.1 | 23.5 | 23.1 | 24.6 | 23.3 | 23.2 | 3.1576  | 0.3530 | gi 635141144 | ras GTPase-activating-like protein IQGAP1                                                   |
| 23.6 | 23.9 | 23.4 | 23.2 | 23.7 | 23.4 | 0.6121  | 0.3551 | gi 635125783 | heterogeneous nuclear ribonucleoprotein H                                                   |
| 19.7 | 20.0 | 18.7 | 19.8 | 20.0 | 19.8 | 2.5185  | 0.3553 | gi 635123365 | lamin-B1                                                                                    |
| 18.3 | 18.1 | 17.6 | 18.1 | 18.4 | 18.2 | 1.7639  | 0.3556 | gi 635048014 | DNA replication licensing factor MCM4                                                       |
| 14.4 | 13.0 | 12.6 | 13.8 | 13.7 | 14.2 | 3.9995  | 0.3581 | gi 635089327 | HEAT repeat-containing protein 6 isoform X2                                                 |
| 18.2 | 18.3 | 17.5 | 15.9 | 18.2 | 17.6 | 0.1709  | 0.3583 | gi 635071031 | niban-like protein 1                                                                        |
| 15.7 | 17.3 | 16.5 | 15.6 | 16.6 | 15.6 | 0.2732  | 0.3586 | gi 635049837 | eukaryotic translation initiation factor 3 subunit H                                        |
| 18.3 | 19.6 | 18.3 | 17.7 | 19.0 | 17.7 | 0.2352  | 0.3595 | gi 635144372 | zinc finger CCHC domain-containing protein 13                                               |
| 20.1 | 19.8 | 19.2 | 19.5 | 20.6 | 20.3 | 2.7178  | 0.3607 | gi 635098317 | cytochrome c-like                                                                           |

|      |      |      |      |      |      |         |        |              |                                                                         |
|------|------|------|------|------|------|---------|--------|--------------|-------------------------------------------------------------------------|
| 20.5 | 21.4 | 21.4 | 15.6 | 20.9 | 21.2 | 0.0124  | 0.3613 | gi 635140670 | 60S ribosomal protein L36a                                              |
| 17.8 | 17.7 | 17.4 | 16.6 | 17.4 | 17.7 | 0.4507  | 0.3617 | gi 635121790 | V-type proton ATPase catalytic subunit A                                |
| 21.7 | 21.2 | 21.0 | 21.2 | 22.0 | 21.8 | 2.1006  | 0.3636 | gi 635041664 | splicing factor U2AF 65 kDa subunit isoform X2                          |
| 25.0 | 24.8 | 25.2 | 25.0 | 25.2 | 25.4 | 1.4474  | 0.3660 | gi 635077852 | superoxide dismutase [Mn], mitochondrial                                |
| 24.9 | 25.6 | 25.3 | 25.3 | 25.5 | 26.1 | 2.1592  | 0.3662 | gi 635018368 | 40S ribosomal protein S25                                               |
| 17.4 | 15.6 | 17.4 | 18.1 | 16.6 | 18.2 | 6.4052  | 0.3666 | gi 635117783 | prothymosin alpha-like, partial                                         |
| 16.7 | 17.2 | 16.0 | 16.5 | 17.3 | 17.5 | 2.8774  | 0.3668 | gi 635065065 | 5-AMP-activated protein kinase subunit gamma-1 isoform X3               |
| 23.4 | 24.0 | 23.6 | 23.6 | 23.6 | 16.0 | 0.0025  | 0.3668 | gi 635090611 | small ubiquitin-related modifier 2                                      |
| 22.0 | 22.4 | 21.8 | 22.0 | 23.1 | 22.3 | 2.2934  | 0.3684 | gi 635054358 | GTP-binding protein SAR1a                                               |
| 19.7 | 20.5 | 20.2 | 20.1 | 19.6 | 20.0 | 0.5334  | 0.3694 | gi 635117785 | V-type proton ATPase 116 kDa subunit a isoform 4                        |
| 18.8 | 19.5 | 18.7 | 19.0 | 18.9 | 17.6 | 0.3016  | 0.3700 | gi 635036432 | phenylalanine--tRNA ligase alpha subunit                                |
| 18.7 | 17.6 | 18.6 | 18.6 | 18.7 | 18.6 | 2.2491  | 0.3734 | gi 635119214 | twinfilin-2 isoform X2                                                  |
| 21.9 | 22.0 | 21.1 | 21.7 | 21.1 | 21.3 | 0.4608  | 0.3740 | gi 635109522 | proteasome subunit beta type-2 isoform X1                               |
| 20.7 | 21.2 | 20.6 | 20.5 | 20.6 | 20.8 | 0.6228  | 0.3743 | gi 635062354 | 26S proteasome non-ATPase regulatory subunit 1                          |
| 18.8 | 18.9 | 18.1 | 15.0 | 18.6 | 18.6 | 0.0606  | 0.3751 | gi 635134996 | dual specificity mitogen-activated protein kinase kinase 1              |
| 18.2 | 17.9 | 17.2 | 17.4 | 18.3 | 21.4 | 17.9562 | 0.3753 | gi 635109236 | polyadenylate-binding protein 4 isoform X4                              |
| 19.4 | 19.5 | 18.0 | 19.2 | 15.2 | 18.6 | 0.0484  | 0.3766 | gi 635049944 | multifunctional protein ADE2-like                                       |
| 21.7 | 22.3 | 21.7 | 21.7 | 21.7 | 21.7 | 0.6363  | 0.3767 | gi 635029473 | calpastatin isoform X10                                                 |
| 15.9 | 15.7 | 15.4 | 15.4 | 16.2 | 16.2 | 1.9865  | 0.3768 | gi 635127215 | actin-related protein 10 isoform X2                                     |
| 20.5 | 15.2 | 20.7 | 20.9 | 20.4 | 20.5 | 62.6191 | 0.3789 | gi 635042208 | NEDD8-conjugating enzyme Ubc12                                          |
| 19.5 | 20.2 | 19.1 | 20.4 | 20.2 | 19.5 | 2.6257  | 0.3791 | gi 635012854 | heterogeneous nuclear ribonucleoprotein U-like protein 2 isoform X2     |
| 18.3 | 19.5 | 19.2 | 19.4 | 19.4 | 19.3 | 2.2743  | 0.3792 | gi 635011090 | CD151 antigen isoform X3                                                |
| 18.2 | 17.1 | 16.8 | 17.2 | 18.4 | 18.4 | 3.7722  | 0.3796 | gi 635133944 | elongation factor Tu GTP-binding domain-containing protein 1 isoform X1 |
| 21.4 | 21.8 | 21.4 | 21.4 | 21.5 | 21.1 | 0.6494  | 0.3805 | gi 635081300 | serine/arginine-rich splicing factor 7 isoform X2                       |
| 15.2 | 18.7 | 17.7 | 18.0 | 18.3 | 18.5 | 10.9908 | 0.3809 | gi 635101024 | glutathione S-transferase theta-2B-like                                 |
| 18.7 | 19.4 | 18.6 | 19.0 | 19.3 | 19.1 | 1.8607  | 0.3812 | gi 635117878 | catenin beta-1 isoform X2                                               |
| 19.5 | 19.4 | 19.0 | 19.2 | 19.6 | 19.7 | 1.5824  | 0.3839 | gi 635057049 | xaa-Pro aminopeptidase 2-like                                           |
| 22.1 | 22.7 | 21.5 | 22.4 | 22.5 | 22.4 | 2.2332  | 0.3845 | gi 635097418 | thioredoxin domain-containing protein 5                                 |
| 22.7 | 23.2 | 22.9 | 23.1 | 23.1 | 23.1 | 1.3879  | 0.3846 | gi 635080417 | malate dehydrogenase, cytoplasmic                                       |
| 23.4 | 23.6 | 23.2 | 23.1 | 23.4 | 23.3 | 0.7132  | 0.3849 | gi 635093656 | fatty acid synthase                                                     |
| 21.8 | 22.1 | 21.5 | 21.8 | 22.1 | 22.0 | 1.5442  | 0.3854 | gi 635075393 | heterogeneous nuclear ribonucleoprotein Q isoform X5                    |
| 19.8 | 19.5 | 19.0 | 19.5 | 19.8 | 19.8 | 1.7427  | 0.3864 | gi 635063100 | ubiquitin carboxyl-terminal hydrolase 5 isoform X2                      |
| 21.9 | 21.8 | 21.6 | 21.8 | 15.6 | 21.8 | 0.0101  | 0.3881 | gi 635107390 | guanine nucleotide-binding protein G(I)/G(S)/G(O) subunit gamma-12      |
| 20.1 | 20.2 | 20.0 | 20.0 | 20.2 | 20.4 | 1.3514  | 0.3885 | gi 635019499 | tumor protein D54 isoform X7                                            |
| 21.7 | 22.4 | 21.8 | 21.6 | 21.9 | 21.8 | 0.5938  | 0.3898 | gi 635125625 | drebrin isoform X2                                                      |
| 23.1 | 23.9 | 23.4 | 23.4 | 23.3 | 23.0 | 0.5782  | 0.3902 | gi 635126484 | proteasome subunit alpha type-6                                         |
| 18.7 | 19.6 | 19.9 | 19.5 | 20.1 | 19.7 | 2.4007  | 0.3904 | gi 635130185 | pyrroline-5-carboxylate reductase 2 isoform X3                          |
| 15.4 | 12.9 | 14.8 | 18.2 | 13.1 | 16.8 | 44.6468 | 0.3910 | gi 635077375 | activating signal cointegrator 1 complex subunit 3 isoform X2           |
| 15.9 | 18.2 | 18.5 | 18.6 | 18.2 | 18.1 | 6.1143  | 0.3917 | gi 635021866 | glutathione synthetase                                                  |
| 17.1 | 17.1 | 16.3 | 16.8 | 17.2 | 17.4 | 2.0214  | 0.3920 | gi 635074168 | osteoclast-stimulating factor 1                                         |
| 22.6 | 22.7 | 22.5 | 22.3 | 22.7 | 22.5 | 0.7331  | 0.3930 | gi 635121115 | ruvB-like 1 isoform X1                                                  |

|      |      |      |      |      |      |         |        |              |                                                                        |
|------|------|------|------|------|------|---------|--------|--------------|------------------------------------------------------------------------|
| 17.2 | 17.0 | 16.9 | 16.5 | 17.2 | 16.9 | 0.6608  | 0.3934 | gi 635094858 | exportin-5 isoform X3                                                  |
| 21.8 | 21.6 | 21.1 | 21.4 | 21.9 | 22.1 | 1.8953  | 0.3951 | gi 635074488 | cathepsin L1                                                           |
| 19.6 | 20.2 | 19.7 | 19.4 | 20.1 | 19.1 | 0.4774  | 0.3959 | gi 635091209 | probable ATP-dependent RNA helicase DDX5                               |
| 18.6 | 18.7 | 17.8 | 16.6 | 18.4 | 18.3 | 0.2509  | 0.3960 | gi 635035790 | mitochondrial import inner membrane translocase subunit TIM44          |
| 21.7 | 21.1 | 20.9 | 21.1 | 21.9 | 21.7 | 2.2168  | 0.3967 | gi 635111902 | protein DJ-1                                                           |
| 18.6 | 18.8 | 18.7 | 18.3 | 19.1 | 15.6 | 0.0935  | 0.3970 | gi 635136191 | huntingtin-interacting protein K isoform X1                            |
| 21.8 | 22.1 | 21.6 | 21.7 | 21.7 | 21.7 | 0.7381  | 0.3976 | gi 635081068 | leucine-rich PPR motif-containing protein, mitochondrial               |
| 18.0 | 19.3 | 17.6 | 18.2 | 19.3 | 19.0 | 3.6546  | 0.3987 | gi 635110733 | acyl-protein thioesterase 2                                            |
| 17.2 | 17.6 | 16.4 | 16.9 | 17.9 | 17.8 | 2.7915  | 0.4000 | gi 635109176 | CAAX prenyl protease 1 homolog isoform X2                              |
| 19.9 | 19.9 | 19.4 | 19.2 | 19.7 | 19.6 | 0.6187  | 0.4002 | gi 635147818 | plastin-3                                                              |
| 18.3 | 18.5 | 17.7 | 18.1 | 19.1 | 18.4 | 2.2336  | 0.4025 | gi 635041251 | U4/U6 small nuclear ribonucleoprotein Prp31                            |
| 17.9 | 17.7 | 16.6 | 16.9 | 17.5 | 16.1 | 0.2863  | 0.4026 | gi 635089348 | hepatocyte nuclear factor 1-beta isoform X2                            |
| 20.2 | 21.8 | 20.7 | 21.4 | 21.3 | 21.4 | 2.7974  | 0.4039 | gi 635016307 | ras-related protein Rab-6A isoform X2                                  |
| 23.9 | 23.8 | 23.6 | 23.9 | 23.9 | 23.8 | 1.2401  | 0.4040 | gi 635023389 | carbonyl reductase [NADPH] 1                                           |
| 13.1 | 13.5 | 13.0 | 12.9 | 14.0 | 13.8 | 2.1958  | 0.4040 | gi 635117779 | nuclear pore complex protein Nup205                                    |
| 21.2 | 21.0 | 20.5 | 20.9 | 21.2 | 21.3 | 1.6819  | 0.4044 | gi 635035464 | lon protease homolog, mitochondrial isoform X3                         |
| 18.3 | 19.2 | 18.7 | 18.6 | 18.3 | 18.6 | 0.5659  | 0.4052 | gi 635056707 | C-terminal-binding protein 2 isoform X5                                |
| 18.7 | 18.7 | 18.1 | 18.2 | 18.3 | 18.5 | 0.6289  | 0.4055 | gi 635050750 | poly(U)-binding-splicing factor PUF60 isoform X7                       |
| 17.2 | 17.1 | 16.4 | 16.8 | 17.7 | 17.2 | 2.2320  | 0.4068 | gi 635017207 | double-strand break repair protein MRE11A isoform X3                   |
| 16.7 | 15.7 | 15.4 | 15.9 | 17.0 | 16.3 | 3.0550  | 0.4076 | gi 635111671 | F-box only protein 44 isoform X2                                       |
| 23.9 | 22.9 | 23.1 | 23.3 | 23.9 | 23.8 | 2.0925  | 0.4077 | gi 635065092 | tubulin alpha-1B chain                                                 |
| 17.1 | 17.0 | 16.0 | 16.7 | 17.3 | 17.1 | 2.2469  | 0.4078 | gi 635070014 | mitochondrial-processing peptidase subunit alpha isoform X3            |
| 20.5 | 21.0 | 20.7 | 21.1 | 21.8 | 20.4 | 2.4577  | 0.4081 | gi 635107236 | quinone oxidoreductase isoform X1                                      |
| 18.1 | 18.9 | 17.9 | 17.6 | 18.1 | 18.2 | 0.4705  | 0.4082 | gi 635058740 | cytoplasmic dynein 1 intermediate chain 2 isoform X10                  |
| 24.3 | 24.5 | 23.9 | 24.0 | 24.2 | 24.1 | 0.6670  | 0.4091 | gi 635049314 | 60S ribosomal protein L30                                              |
| 20.8 | 20.8 | 14.7 | 20.1 | 20.6 | 21.4 | 84.5305 | 0.4094 | gi 635113191 | uridine phosphorylase 1 isoform X3                                     |
| 21.1 | 21.6 | 21.2 | 21.0 | 21.4 | 20.8 | 0.6231  | 0.4099 | gi 635104792 | protein S100-A16                                                       |
| 17.0 | 17.5 | 17.6 | 17.3 | 17.7 | 17.9 | 1.7417  | 0.4102 | gi 635108558 | alcohol dehydrogenase [NADP(+)] isoform X2                             |
| 17.7 | 16.2 | 16.3 | 17.9 | 16.4 | 17.8 | 4.2249  | 0.4107 | gi 635117092 | cullin-1                                                               |
| 19.8 | 20.1 | 19.9 | 20.0 | 20.2 | 19.9 | 1.3211  | 0.4108 | gi 635120849 | transmembrane protein 43                                               |
| 23.8 | 24.0 | 23.6 | 23.7 | 23.7 | 23.6 | 0.7482  | 0.4109 | gi 635093872 | ATP-citrate synthase                                                   |
| 15.7 | 16.2 | 15.2 | 16.1 | 16.4 | 15.6 | 2.1973  | 0.4112 | gi 635080598 | polyribonucleotide nucleotidyltransferase 1, mitochondrial isoform X2  |
| 24.8 | 24.6 | 24.6 | 24.7 | 24.9 | 24.7 | 1.2819  | 0.4114 | gi 635083137 | 40S ribosomal protein SA isoform X2                                    |
| 17.4 | 17.2 | 16.8 | 16.5 | 17.0 | 17.2 | 0.5835  | 0.4120 | gi 635034878 | receptor expression-enhancing protein 6 isoform X2                     |
| 18.8 | 20.7 | 20.5 | 20.3 | 21.0 | 20.5 | 3.7465  | 0.4120 | gi 635022382 | small nuclear ribonucleoprotein-associated proteins B and B isoform X2 |
| 15.8 | 16.7 | 16.7 | 16.5 | 16.0 | 15.7 | 0.4578  | 0.4124 | gi 635097427 | desmoplakin isoform X2                                                 |
| 22.0 | 22.7 | 22.0 | 22.3 | 22.4 | 22.6 | 1.7483  | 0.4125 | gi 635043329 | heterogeneous nuclear ribonucleoprotein D0 isoform X4                  |
| 20.9 | 22.0 | 21.0 | 21.5 | 22.4 | 21.4 | 2.7566  | 0.4126 | gi 635114119 | chromobox protein homolog 3 isoform X2                                 |
| 18.5 | 19.0 | 18.6 | 19.2 | 19.0 | 18.6 | 1.6660  | 0.4127 | gi 635034283 | large neutral amino acids transporter small subunit 1 isoform X2       |
| 23.0 | 23.0 | 22.8 | 19.9 | 22.7 | 23.3 | 0.1082  | 0.4132 | gi 635104768 | protein S100-A1                                                        |
| 18.5 | 18.4 | 17.2 | 18.6 | 18.8 | 18.0 | 2.8619  | 0.4136 | gi 635109861 | importin subunit alpha-7                                               |



|      |      |      |      |      |      |         |        |              |                                                                          |
|------|------|------|------|------|------|---------|--------|--------------|--------------------------------------------------------------------------|
| 17.5 | 15.8 | 15.5 | 16.8 | 16.7 | 17.0 | 3.8635  | 0.4140 | gi 635023514 | proteasome assembly chaperone 1                                          |
| 23.2 | 23.2 | 22.4 | 22.8 | 22.7 | 22.4 | 0.5594  | 0.4156 | gi 635092793 | proteasome subunit beta type-3                                           |
| 18.6 | 19.0 | 18.8 | 19.0 | 18.7 | 19.2 | 1.4111  | 0.4167 | gi 635121124 | protein transport protein Sec61 subunit alpha isoform 1                  |
| 19.2 | 18.8 | 18.8 | 18.2 | 18.5 | 19.2 | 0.5015  | 0.4177 | gi 635100049 | NADH dehydrogenase [ubiquinone] flavoprotein 2, mitochondrial isoform X2 |
| 23.0 | 23.1 | 22.8 | 22.6 | 22.8 | 23.1 | 0.6845  | 0.4179 | gi 635100588 | ubiquitin-conjugating enzyme E2 L3 isoform X2                            |
| 19.3 | 19.9 | 19.6 | 19.4 | 19.7 | 18.9 | 0.5644  | 0.4180 | gi 635103354 | adenylosuccinate lyase                                                   |
| 25.4 | 24.7 | 25.0 | 26.1 | 24.8 | 25.4 | 2.3609  | 0.4192 | gi 635139491 | heat shock protein beta-1                                                |
| 16.8 | 18.1 | 16.6 | 17.5 | 15.2 | 16.7 | 0.1845  | 0.4195 | gi 401316367 | MHC class IB protein                                                     |
| 25.0 | 25.7 | 25.2 | 25.7 | 25.3 | 25.5 | 1.6101  | 0.4200 | gi 635092135 | 60S ribosomal protein L27                                                |
| 24.9 | 25.0 | 24.3 | 24.7 | 25.0 | 25.1 | 1.6152  | 0.4208 | gi 635116380 | aldo-keto reductase family 1 member B10 isoform X1                       |
| 19.8 | 20.5 | 15.4 | 19.6 | 20.2 | 20.1 | 27.3598 | 0.4217 | gi 635022032 | U2 small nuclear ribonucleoprotein B                                     |
| 21.4 | 22.1 | 21.8 | 21.8 | 21.1 | 21.6 | 0.5395  | 0.4224 | gi 635034209 | cytochrome c oxidase subunit 4 isoform 1, mitochondrial isoform X2       |
| 16.2 | 16.5 | 15.5 | 15.7 | 17.3 | 16.7 | 3.0130  | 0.4233 | gi 635095034 | 60S ribosomal protein L7-like 1 isoform X1                               |
| 18.6 | 18.4 | 18.3 | 18.3 | 18.8 | 18.8 | 1.5287  | 0.4236 | gi 635072486 | aldehyde dehydrogenase X, mitochondrial isoform X5                       |
| 24.8 | 25.9 | 25.3 | 25.4 | 25.8 | 25.7 | 1.9758  | 0.4238 | gi 635128407 | 60S ribosomal protein L22                                                |
| 19.9 | 19.2 | 19.6 | 19.6 | 20.0 | 19.8 | 1.6069  | 0.4258 | gi 635036371 | ATPase ASNA1                                                             |
| 20.5 | 21.0 | 20.5 | 19.8 | 20.9 | 20.4 | 0.4712  | 0.4258 | gi 635011561 | src substrate cortactin isoform X4                                       |
| 21.7 | 22.3 | 21.3 | 21.8 | 22.4 | 22.0 | 1.9477  | 0.4270 | gi 635043343 | heterogeneous nuclear ribonucleoprotein D-like isoform X2                |
| 14.5 | 18.4 | 17.3 | 17.6 | 17.5 | 18.3 | 11.1862 | 0.4274 | gi 635093749 | ketosamine-3-kinase                                                      |
| 21.7 | 22.0 | 21.6 | 21.3 | 21.8 | 21.6 | 0.6688  | 0.4276 | gi 635071555 | ras-related protein Rab-14                                               |
| 18.7 | 19.0 | 18.8 | 15.2 | 19.1 | 18.8 | 0.0796  | 0.4277 | gi 635100837 | 39S ribosomal protein L40, mitochondrial                                 |
| 22.2 | 22.4 | 21.7 | 22.6 | 22.3 | 22.1 | 1.6714  | 0.4281 | gi 635147622 | membrane-associated progesterone receptor component 1                    |
| 15.7 | 16.8 | 15.9 | 15.6 | 16.0 | 15.9 | 0.4755  | 0.4287 | gi 635143085 | probable ubiquitin carboxyl-terminal hydrolase FAF-X isoform X4          |
| 17.7 | 17.5 | 16.7 | 17.2 | 17.8 | 17.9 | 2.0745  | 0.4297 | gi 635079521 | U4/U6.U5 tri-snRNP-associated protein 2 isoform X4                       |
| 21.9 | 22.2 | 21.9 | 21.9 | 22.3 | 22.1 | 1.3347  | 0.4297 | gi 635141559 | purine nucleoside phosphorylase                                          |
| 20.0 | 19.7 | 19.0 | 19.8 | 15.8 | 19.7 | 0.0700  | 0.4297 | gi 635096080 | U6 snRNA-associated Sm-like protein LSm2                                 |
| 16.9 | 20.2 | 19.2 | 19.8 | 19.4 | 19.7 | 7.4414  | 0.4300 | gi 635129109 | glutaredoxin-related protein 5, mitochondrial                            |
| 18.3 | 19.8 | 15.5 | 18.9 | 19.2 | 18.8 | 12.6437 | 0.4317 | gi 635062257 | thymidylate kinase isoform X1                                            |
| 20.7 | 21.4 | 20.8 | 21.3 | 15.8 | 21.0 | 0.0273  | 0.4328 | gi 635023806 | cystatin-B                                                               |
| 23.7 | 23.7 | 23.5 | 24.0 | 23.7 | 23.5 | 1.3016  | 0.4344 | gi 635040466 | 40S ribosomal protein S11                                                |
| 24.5 | 25.0 | 24.0 | 23.9 | 24.5 | 24.2 | 0.5051  | 0.4361 | gi 635030030 | 40S ribosomal protein S2 isoform X1                                      |
| 20.8 | 15.1 | 20.9 | 20.2 | 21.3 | 20.4 | 47.9156 | 0.4366 | gi 635011354 | CD81 antigen isoform X2                                                  |
| 19.9 | 20.4 | 19.4 | 19.8 | 20.4 | 20.4 | 2.0304  | 0.4367 | gi 635097465 | translocon-associated protein subunit alpha isoform X2                   |
| 24.0 | 22.8 | 23.9 | 23.6 | 24.4 | 23.9 | 2.4304  | 0.4376 | gi 635092357 | 40S ribosomal protein S26-like                                           |
| 22.0 | 22.7 | 22.8 | 22.7 | 22.8 | 22.8 | 1.6936  | 0.4383 | gi 635147909 | 60S ribosomal protein L10                                                |
| 22.9 | 23.4 | 22.9 | 23.1 | 23.3 | 23.1 | 1.3857  | 0.4383 | gi 635022540 | eukaryotic translation initiation factor 6                               |
| 19.7 | 20.1 | 19.6 | 19.7 | 20.1 | 20.1 | 1.4566  | 0.4399 | gi 635128762 | 26S protease regulatory subunit 4                                        |
| 20.9 | 21.0 | 20.3 | 20.7 | 21.0 | 21.2 | 1.7155  | 0.4401 | gi 635068717 | malectin                                                                 |
| 20.1 | 20.4 | 19.6 | 20.1 | 20.4 | 20.3 | 1.6748  | 0.4417 | gi 635124344 | glucosamine-6-phosphate isomerase 1                                      |
| 21.3 | 23.0 | 22.9 | 23.1 | 22.7 | 22.9 | 3.0937  | 0.4425 | gi 635024681 | 60S ribosomal protein L21 isoform X2                                     |
| 22.3 | 22.2 | 21.8 | 22.3 | 21.9 | 21.6 | 0.6346  | 0.4454 | gi 635116813 | single-stranded DNA-binding protein, mitochondrial isoform X2            |

|      |      |      |      |      |      |         |        |              |                                                                                   |
|------|------|------|------|------|------|---------|--------|--------------|-----------------------------------------------------------------------------------|
| 23.0 | 22.8 | 22.2 | 22.8 | 23.0 | 22.8 | 1.6945  | 0.4456 | gi 635041030 | serine/threonine-protein phosphatase 2A 65 kDa regulatory subunit A alpha isoform |
| 16.3 | 16.6 | 15.8 | 16.0 | 16.3 | 15.6 | 0.5384  | 0.4460 | gi 635127008 | fermitin family homolog 2 isoform X4                                              |
| 14.2 | 13.7 | 13.9 | 13.7 | 14.4 | 14.6 | 1.8511  | 0.4467 | gi 635084478 | probable ATP-dependent RNA helicase DHX36 isoform X1                              |
| 21.6 | 22.1 | 21.0 | 22.0 | 21.8 | 21.8 | 1.9244  | 0.4469 | gi 635113719 | septin-7 isoform X5                                                               |
| 24.3 | 24.4 | 24.2 | 24.2 | 24.3 | 24.3 | 0.9019  | 0.4472 | gi 635144319 | 40S ribosomal protein S4, X isoform                                               |
| 20.0 | 21.5 | 21.8 | 21.9 | 21.9 | 21.1 | 3.3353  | 0.4473 | gi 635105821 | ATP synthase F(0) complex subunit B1, mitochondrial isoform X2                    |
| 19.3 | 19.3 | 18.8 | 19.2 | 18.8 | 18.9 | 0.7031  | 0.4474 | gi 635031741 | major vault protein                                                               |
| 18.4 | 18.3 | 18.0 | 17.9 | 18.2 | 18.2 | 0.7410  | 0.4476 | gi 635035071 | thimet oligopeptidase                                                             |
| 23.6 | 21.4 | 21.1 | 18.9 | 21.4 | 22.4 | 0.0789  | 0.4477 | gi 635063458 | transcription elongation factor B polypeptide 2                                   |
| 19.9 | 20.4 | 20.1 | 20.1 | 20.3 | 20.5 | 1.4680  | 0.4487 | gi 635038827 | calpain-12 isoform X4                                                             |
| 20.0 | 20.1 | 19.6 | 19.8 | 20.3 | 20.3 | 1.5661  | 0.4490 | gi 635147869 | plastin-3-like                                                                    |
| 19.8 | 20.2 | 20.0 | 20.2 | 19.1 | 19.8 | 0.4977  | 0.4499 | gi 635146931 | adipocyte plasma membrane-associated protein isoform X2                           |
| 19.5 | 20.3 | 19.5 | 19.9 | 19.9 | 20.3 | 1.7821  | 0.4500 | gi 635100570 | mitogen-activated protein kinase 1                                                |
| 19.9 | 18.9 | 19.3 | 19.4 | 19.7 | 19.8 | 1.8625  | 0.4506 | gi 635017875 | neural cell adhesion molecule 1 isoform X7                                        |
| 18.5 | 19.6 | 19.1 | 20.3 | 17.3 | 16.9 | 0.1174  | 0.4509 | gi 635083729 | fragile X mental retardation syndrome-related protein 1 isoform X7                |
| 17.4 | 19.3 | 18.9 | 15.1 | 18.6 | 18.7 | 0.0802  | 0.4529 | gi 635109822 | histone deacetylase 1 isoform X2                                                  |
| 20.0 | 20.3 | 19.5 | 20.1 | 20.2 | 20.2 | 1.5428  | 0.4530 | gi 635047440 | glutathione reductase, mitochondrial                                              |
| 19.0 | 18.1 | 18.2 | 18.7 | 19.1 | 18.3 | 1.9427  | 0.4530 | gi 635131846 | 60 kDa SS-A/Ro ribonucleoprotein                                                  |
| 23.7 | 24.1 | 23.5 | 23.9 | 24.2 | 23.7 | 1.5106  | 0.4538 | gi 635104156 | lamin                                                                             |
| 22.2 | 22.4 | 22.2 | 22.4 | 22.6 | 22.2 | 1.3230  | 0.4540 | gi 635010939 | ribonuclease inhibitor                                                            |
| 19.1 | 21.0 | 14.3 | 18.8 | 20.7 | 20.0 | 50.5662 | 0.4541 | gi 635069022 | transmembrane emp24 domain-containing protein 2                                   |
| 26.5 | 27.0 | 26.4 | 26.7 | 26.8 | 26.9 | 1.4569  | 0.4542 | gi 635071220 | 78 kDa glucose-regulated protein                                                  |
| 22.6 | 23.2 | 22.6 | 22.7 | 23.2 | 23.2 | 1.6783  | 0.4572 | gi 635139493 | 14-3-3 protein gamma                                                              |
| 25.5 | 26.3 | 26.0 | 26.0 | 26.3 | 26.1 | 1.5690  | 0.4588 | gi 635011074 | 60S acidic ribosomal protein P2                                                   |
| 17.1 | 17.8 | 16.8 | 17.1 | 18.1 | 17.6 | 2.2154  | 0.4589 | gi 635041596 | isochorismatase domain-containing protein 2, mitochondrial isoform X2             |
| 16.6 | 16.6 | 16.4 | 16.4 | 16.8 | 15.3 | 0.4310  | 0.4590 | gi 635110799 | ephrin type-B receptor 2 isoform X4                                               |
| 21.0 | 21.1 | 20.7 | 21.1 | 21.0 | 21.0 | 1.2649  | 0.4595 | gi 635091312 | 26S protease regulatory subunit 8 isoform X2                                      |
| 20.5 | 20.5 | 20.2 | 19.6 | 20.5 | 20.4 | 0.5531  | 0.4613 | gi 635062601 | peptidyl-prolyl cis-trans isomerase FKBP4                                         |
| 19.1 | 19.9 | 19.7 | 19.6 | 20.5 | 19.5 | 2.1097  | 0.4615 | gi 635128386 | SRA stem-loop-interacting RNA-binding protein, mitochondrial                      |
| 19.9 | 20.2 | 19.6 | 19.7 | 20.3 | 20.4 | 1.6567  | 0.4630 | gi 635122445 | oxygen-dependent coproporphyrinogen-III oxidase, mitochondrial                    |
| 18.2 | 18.2 | 16.9 | 17.8 | 18.0 | 18.8 | 2.6754  | 0.4640 | gi 635042286 | SUMO-activating enzyme subunit 1                                                  |
| 22.0 | 22.3 | 21.2 | 21.4 | 21.8 | 21.5 | 0.5016  | 0.4645 | gi 635077868 | acetyl-CoA acetyltransferase, cytosolic                                           |
| 21.3 | 22.3 | 22.0 | 21.2 | 22.0 | 21.5 | 0.4908  | 0.4661 | gi 635105802 | ras-related protein Rap-1A                                                        |
| 20.7 | 19.6 | 20.2 | 20.2 | 20.7 | 20.4 | 1.9127  | 0.4668 | gi 635141900 | polyadenylate-binding protein 2                                                   |
| 24.4 | 24.9 | 24.2 | 24.2 | 24.1 | 24.6 | 0.6151  | 0.4669 | gi 635022989 | superoxide dismutase [Cu-Zn]                                                      |
| 21.9 | 22.5 | 22.2 | 21.8 | 22.2 | 22.0 | 0.6979  | 0.4672 | gi 635012684 | ubiquitin thioesterase OTUB1                                                      |
| 18.8 | 20.9 | 20.5 | 20.9 | 20.2 | 20.7 | 3.5685  | 0.4692 | gi 635123064 | receptor expression-enhancing protein 5                                           |
| 18.0 | 18.2 | 18.1 | 17.9 | 18.2 | 18.0 | 0.8162  | 0.4693 | gi 635101391 | AP-1 complex subunit beta-1 isoform X8                                            |
| 24.5 | 25.1 | 24.6 | 24.8 | 25.0 | 24.8 | 1.3949  | 0.4702 | gi 635119712 | ADP-ribosylation factor 4 isoform X1                                              |
| 15.9 | 16.9 | 15.3 | 15.5 | 17.3 | 17.0 | 3.7302  | 0.4709 | gi 635134118 | WD repeat-containing protein 61 isoform X4                                        |
| 17.9 | 18.2 | 17.6 | 17.7 | 18.4 | 18.4 | 1.7350  | 0.4725 | gi 635054161 | prolyl 4-hydroxylase subunit alpha-1 isoform X2                                   |

|      |      |      |      |      |      |         |        |              |                                                                                         |
|------|------|------|------|------|------|---------|--------|--------------|-----------------------------------------------------------------------------------------|
| 20.5 | 21.2 | 20.1 | 20.3 | 20.6 | 20.2 | 0.5424  | 0.4729 | gi 635040292 | apoptosis regulator BAX isoform X2                                                      |
| 19.7 | 19.3 | 14.1 | 19.3 | 19.3 | 18.8 | 26.7126 | 0.4730 | gi 635084636 | profilin-2                                                                              |
| 22.8 | 23.2 | 22.9 | 23.1 | 23.0 | 22.1 | 0.5299  | 0.4737 | gi 635097855 | 60S ribosomal protein L23                                                               |
| 20.1 | 20.6 | 20.0 | 19.5 | 20.4 | 20.0 | 0.5469  | 0.4749 | gi 635033096 | splicing factor 3B subunit 3                                                            |
| 22.0 | 23.8 | 23.1 | 22.2 | 23.3 | 21.7 | 0.2666  | 0.4760 | gi 635088778 | 60S ribosomal protein L23a                                                              |
| 20.9 | 21.5 | 20.9 | 21.2 | 21.2 | 21.3 | 1.4140  | 0.4762 | gi 635124842 | annexin A6                                                                              |
| 25.5 | 26.4 | 25.8 | 25.6 | 26.1 | 25.1 | 0.5009  | 0.4765 | gi 635137765 | ubiquitin carboxyl-terminal hydrolase isozyme L1                                        |
| 24.7 | 25.3 | 24.7 | 24.8 | 24.6 | 24.8 | 0.6816  | 0.4765 | gi 635103783 | transgelin-2                                                                            |
| 21.3 | 22.1 | 20.2 | 21.6 | 21.7 | 21.6 | 2.7512  | 0.4769 | gi 635138284 | dihydropteridine reductase                                                              |
| 18.3 | 18.3 | 18.8 | 18.2 | 17.4 | 18.8 | 0.4355  | 0.4775 | gi 635120639 | proline-rich transmembrane protein 3 isoform X7                                         |
| 20.2 | 21.9 | 21.8 | 20.9 | 21.1 | 20.5 | 0.3548  | 0.4791 | gi 635071304 | proteasome subunit beta type-7 isoform X2                                               |
| 19.9 | 22.6 | 19.8 | 19.1 | 20.7 | 20.1 | 0.1543  | 0.4805 | gi 635125723 | heterogeneous nuclear ribonucleoprotein A/B                                             |
| 18.3 | 18.0 | 16.8 | 17.8 | 18.2 | 18.2 | 2.3919  | 0.4814 | gi 635062002 | NADH dehydrogenase [ubiquinone] 1 alpha subcomplex subunit 10, mitochondrial isoform X2 |
| 18.7 | 18.6 | 18.0 | 18.4 | 18.7 | 18.7 | 1.5413  | 0.4827 | gi 635142414 | pirin isoform X2                                                                        |
| 24.4 | 24.5 | 23.9 | 24.7 | 24.6 | 24.1 | 1.6246  | 0.4831 | gi 635104919 | protein S100-A11                                                                        |
| 20.4 | 20.0 | 19.7 | 19.8 | 19.9 | 19.8 | 0.6664  | 0.4832 | gi 635143818 | regulator complex protein LAMTOR3                                                       |
| 14.3 | 16.8 | 15.8 | 15.7 | 16.7 | 16.3 | 3.9382  | 0.4852 | gi 635043129 | nucleoporin p54 isoform X2                                                              |
| 20.3 | 20.0 | 19.8 | 19.9 | 20.2 | 19.3 | 0.5766  | 0.4855 | gi 635085677 | ras-related protein Rab-5A                                                              |
| 22.0 | 22.5 | 22.4 | 22.4 | 22.6 | 22.3 | 1.3616  | 0.4857 | gi 635074250 | phosphoserine aminotransferase                                                          |
| 24.7 | 25.1 | 24.5 | 24.4 | 24.7 | 24.7 | 0.7037  | 0.4858 | gi 635074371 | heterogeneous nuclear ribonucleoprotein K                                               |
| 23.4 | 23.6 | 23.4 | 23.4 | 23.7 | 23.7 | 1.2539  | 0.4868 | gi 635126083 | proteasome activator complex subunit 1                                                  |
| 20.1 | 19.8 | 19.7 | 19.7 | 19.6 | 19.9 | 0.7754  | 0.4870 | gi 635112427 | guanine nucleotide-binding protein G(I)/G(S)/G(T) subunit beta-1                        |
| 17.6 | 18.0 | 14.9 | 17.1 | 17.8 | 17.8 | 5.6935  | 0.4872 | gi 635062795 | fructose-2,6-bisphosphatase TIGAR                                                       |
| 21.5 | 22.6 | 22.1 | 20.8 | 22.3 | 21.9 | 0.3793  | 0.4876 | gi 635048018 | ubiquitin-conjugating enzyme E2 variant 2 isoform X2                                    |
| 20.9 | 20.1 | 19.7 | 20.8 | 21.2 | 19.9 | 2.4258  | 0.4878 | gi 635112856 | heterogeneous nuclear ribonucleoprotein R                                               |
| 18.6 | 18.7 | 19.0 | 17.7 | 16.9 | 19.8 | 0.2185  | 0.4885 | gi 635081045 | prolyl endopeptidase-like isoform X3                                                    |
| 20.0 | 20.4 | 19.7 | 19.9 | 20.6 | 20.2 | 1.5896  | 0.4890 | gi 635042913 | MOB kinase activator 1B isoform X5                                                      |
| 18.7 | 20.1 | 19.5 | 19.9 | 19.7 | 14.5 | 0.0420  | 0.4896 | gi 635105075 | 26S proteasome non-ATPase regulatory subunit 4                                          |
| 16.5 | 16.6 | 15.6 | 16.4 | 16.2 | 17.1 | 2.0457  | 0.4897 | gi 635056671 | phospholysine phosphohistidine inorganic pyrophosphate phosphatase isoform X3           |
| 21.6 | 21.8 | 21.4 | 21.5 | 21.6 | 21.3 | 0.7832  | 0.4908 | gi 635092401 | peptidyl-prolyl cis-trans isomerase FKBP10 isoform X2                                   |
| 22.3 | 24.2 | 24.0 | 23.9 | 23.9 | 24.2 | 2.8744  | 0.4916 | gi 635087773 | 60S ribosomal protein L26                                                               |
| 17.9 | 19.4 | 18.9 | 19.3 | 19.6 | 18.5 | 2.6092  | 0.4922 | gi 635116977 | zyxin isoform X3                                                                        |
| 22.4 | 22.5 | 22.3 | 21.8 | 22.5 | 22.4 | 0.6653  | 0.4923 | gi 635089088 | 26S proteasome non-ATPase regulatory subunit 11                                         |
| 17.9 | 17.9 | 17.5 | 17.5 | 18.1 | 18.5 | 1.6993  | 0.4930 | gi 635123387 | protein PRRC1                                                                           |
| 26.4 | 27.1 | 26.8 | 26.5 | 26.6 | 26.6 | 0.6965  | 0.4935 | gi 635094763 | heat shock protein HSP 90-beta                                                          |
| 17.1 | 17.3 | 16.5 | 16.9 | 17.7 | 17.0 | 1.8056  | 0.4935 | gi 635086178 | lipoma-preferred partner                                                                |
| 15.3 | 16.3 | 15.5 | 15.0 | 15.2 | 15.9 | 0.4799  | 0.4945 | gi 635035258 | hepatoma-derived growth factor-related protein 2 isoform X2                             |
| 21.7 | 21.9 | 21.5 | 21.7 | 21.8 | 22.0 | 1.3004  | 0.4946 | gi 635107295 | cystathionine gamma-lyase isoform X1                                                    |
| 18.2 | 18.2 | 17.7 | 18.0 | 18.2 | 18.2 | 1.3887  | 0.4963 | gi 635081726 | BRCA1-A complex subunit BRE isoform X4                                                  |
| 21.0 | 21.3 | 20.4 | 21.2 | 21.2 | 20.9 | 1.5728  | 0.4963 | gi 401316342 | MHC class IA protein, partial                                                           |
| 18.5 | 18.9 | 18.6 | 17.9 | 18.8 | 18.6 | 0.6087  | 0.4963 | gi 635064742 | twinfilin-1 isoform X2                                                                  |

|      |      |      |      |      |      |         |        |              |                                                                                   |
|------|------|------|------|------|------|---------|--------|--------------|-----------------------------------------------------------------------------------|
| 19.2 | 19.2 | 19.0 | 19.0 | 19.4 | 19.2 | 1.2810  | 0.4968 | gi 635101743 | developmentally-regulated GTP-binding protein 1                                   |
| 25.9 | 26.5 | 26.4 | 26.4 | 26.3 | 26.6 | 1.4321  | 0.4969 | gi 635093945 | elongation factor 1-alpha 1                                                       |
| 20.8 | 20.1 | 19.8 | 20.7 | 20.4 | 20.3 | 1.7000  | 0.4983 | gi 635032841 | aspartate aminotransferase, mitochondrial                                         |
| 15.6 | 14.9 | 13.1 | 14.5 | 16.2 | 14.9 | 4.5269  | 0.4986 | gi 635036337 | lysosomal alpha-mannosidase isoform X2                                            |
| 23.0 | 22.9 | 22.1 | 22.8 | 23.0 | 22.8 | 1.6236  | 0.4995 | gi 635113514 | proteasome subunit alpha type-2                                                   |
| 20.3 | 20.8 | 19.8 | 19.9 | 21.1 | 21.0 | 2.2650  | 0.4995 | gi 635033351 | cytochrome b5 type B                                                              |
| 18.7 | 18.1 | 16.9 | 17.8 | 18.1 | 15.9 | 0.2291  | 0.5003 | gi 635073145 | dnaJ homolog subfamily A member 1                                                 |
| 17.5 | 18.0 | 17.4 | 17.4 | 18.0 | 18.1 | 1.6305  | 0.5015 | gi 635032166 | dnaJ homolog subfamily A member 2                                                 |
| 18.8 | 18.9 | 18.1 | 18.4 | 18.0 | 18.8 | 0.5774  | 0.5028 | gi 635028735 | 28S ribosomal protein S27, mitochondrial isoform X2                               |
| 18.5 | 18.9 | 18.6 | 18.6 | 19.0 | 18.7 | 1.2924  | 0.5029 | gi 635108193 | thioredoxin domain-containing protein 12                                          |
| 18.1 | 17.7 | 17.6 | 17.5 | 17.5 | 17.9 | 0.7039  | 0.5036 | gi 635058269 | T-box brain protein 1                                                             |
| 16.3 | 16.6 | 15.4 | 15.7 | 17.1 | 16.7 | 2.5136  | 0.5051 | gi 635116176 | transportin-3 isoform X2                                                          |
| 19.0 | 19.4 | 19.0 | 18.4 | 19.2 | 19.0 | 0.6082  | 0.5059 | gi 635031591 | eukaryotic translation initiation factor 3 subunit C                              |
| 24.4 | 25.0 | 24.5 | 25.1 | 24.8 | 24.6 | 1.5592  | 0.5062 | gi 635099823 | myosin regulatory light chain 12A isoform X2                                      |
| 23.1 | 23.1 | 23.5 | 22.9 | 23.2 | 23.1 | 0.7770  | 0.5075 | gi 635080453 | T-complex protein 1 subunit delta                                                 |
| 16.8 | 16.8 | 16.3 | 16.1 | 16.6 | 16.6 | 0.6742  | 0.5076 | gi 635084309 | elongation factor G, mitochondrial                                                |
| 19.1 | 19.0 | 18.9 | 18.9 | 19.2 | 19.1 | 1.1884  | 0.5083 | gi 635059456 | unconventional myosin-Ib isoform X8                                               |
| 19.8 | 19.8 | 19.7 | 19.5 | 20.1 | 20.2 | 1.4378  | 0.5085 | gi 635049029 | 2,4-dienoyl-CoA reductase, mitochondrial                                          |
| 20.2 | 20.7 | 19.6 | 20.1 | 20.1 | 19.6 | 0.5553  | 0.5090 | gi 635115016 | sorcin isoform X3                                                                 |
| 15.5 | 15.3 | 14.5 | 15.0 | 15.8 | 15.3 | 1.9001  | 0.5095 | gi 635044718 | heat shock 70 kDa protein 4L                                                      |
| 18.1 | 20.3 | 19.4 | 19.4 | 19.7 | 15.3 | 0.0750  | 0.5100 | gi 635047181 | serine/threonine-protein phosphatase 2A 55 kDa regulatory subunit B alpha isoform |
| 19.6 | 19.1 | 19.5 | 19.3 | 19.5 | 20.0 | 1.4942  | 0.5101 | gi 635100580 | stromal cell-derived factor 2-like protein 1                                      |
| 19.1 | 18.6 | 17.7 | 18.2 | 19.1 | 19.1 | 2.2693  | 0.5112 | gi 635021116 | long-chain-fatty-acid--CoA ligase 4-like                                          |
| 20.3 | 21.6 | 20.7 | 21.2 | 21.9 | 20.7 | 2.3444  | 0.5120 | gi 635060667 | actin-related protein 2/3 complex subunit 2 isoform X4                            |
| 21.6 | 22.1 | 21.7 | 21.5 | 22.1 | 21.2 | 0.6034  | 0.5121 | gi 635068565 | phosphatidylethanolamine-binding protein 1 isoform X2                             |
| 23.5 | 23.5 | 23.1 | 23.2 | 23.2 | 23.4 | 0.7860  | 0.5123 | gi 635102530 | aconitate hydratase, mitochondrial isoform X2                                     |
| 21.3 | 21.3 | 20.6 | 20.9 | 21.6 | 21.4 | 1.6183  | 0.5146 | gi 635137115 | enoyl-CoA hydratase, mitochondrial                                                |
| 19.8 | 20.4 | 21.1 | 20.3 | 19.3 | 20.6 | 0.4088  | 0.5150 | gi 635053864 | voltage-dependent anion-selective channel protein 2 isoform X2                    |
| 11.4 | 14.1 | 11.2 | 11.5 | 14.5 | 13.4 | 7.9281  | 0.5158 | gi 635133362 | HEAT repeat-containing protein 1                                                  |
| 19.8 | 19.9 | 18.2 | 19.5 | 16.7 | 19.5 | 0.1733  | 0.5166 | gi 635059722 | peptidyl-prolyl cis-trans isomerase-like 3                                        |
| 21.4 | 21.6 | 21.2 | 21.5 | 21.6 | 21.4 | 1.2151  | 0.5179 | gi 635098466 | asparagine--tRNA ligase, cytoplasmic                                              |
| 25.1 | 24.8 | 24.1 | 23.9 | 24.8 | 24.5 | 0.5334  | 0.5188 | gi 635107875 | cofilin-1                                                                         |
| 22.1 | 22.2 | 21.7 | 21.7 | 21.8 | 22.0 | 0.7424  | 0.5195 | gi 635113469 | biliverdin reductase A isoform X2                                                 |
| 21.1 | 19.8 | 21.3 | 20.9 | 20.9 | 21.6 | 2.3806  | 0.5199 | gi 635014254 | CD44 antigen isoform X19                                                          |
| 17.2 | 17.4 | 17.4 | 17.3 | 15.5 | 17.7 | 0.3267  | 0.5207 | gi 635143828 | melanoma-associated antigen D2                                                    |
| 24.6 | 24.4 | 24.0 | 24.4 | 24.6 | 24.4 | 1.3457  | 0.5207 | gi 635137470 | pyruvate kinase PKM                                                               |
| 17.3 | 20.9 | 18.4 | 17.8 | 21.6 | 20.5 | 12.4037 | 0.5217 | gi 635096862 | histone H3.1                                                                      |
| 23.6 | 24.1 | 23.6 | 23.9 | 23.9 | 23.9 | 1.2711  | 0.5224 | gi 635023078 | T-complex protein 1 subunit theta                                                 |
| 19.8 | 19.1 | 16.2 | 18.5 | 19.3 | 19.7 | 6.4093  | 0.5236 | gi 635130161 | poly [ADP-ribose] polymerase 1                                                    |
| 24.3 | 24.6 | 24.1 | 24.4 | 24.7 | 24.4 | 1.3363  | 0.5246 | gi 635123914 | stress-70 protein, mitochondrial                                                  |
| 23.4 | 23.4 | 23.5 | 23.4 | 23.6 | 23.5 | 1.0977  | 0.5250 | gi 635080147 | poly(rC)-binding protein 1                                                        |

|      |      |      |      |      |      |        |        |              |                                                                      |
|------|------|------|------|------|------|--------|--------|--------------|----------------------------------------------------------------------|
| 21.0 | 21.6 | 21.1 | 21.2 | 21.4 | 21.4 | 1.3610 | 0.5253 | gi 635040861 | electron transfer flavoprotein subunit beta                          |
| 22.0 | 23.5 | 22.7 | 23.0 | 23.3 | 22.9 | 2.0364 | 0.5263 | gi 635057348 | 60S ribosomal protein L34                                            |
| 21.3 | 22.0 | 21.6 | 21.4 | 21.6 | 21.4 | 0.6944 | 0.5268 | gi 635039002 | 26S protease regulatory subunit 6B                                   |
| 18.6 | 18.3 | 18.2 | 17.9 | 18.3 | 18.5 | 0.7167 | 0.5280 | gi 635146583 | vesicle-associated membrane protein 7 isoform X2                     |
| 19.0 | 19.8 | 18.6 | 18.6 | 19.4 | 18.6 | 0.5001 | 0.5293 | gi 635060496 | fibronectin isoform X16                                              |
| 26.0 | 26.7 | 26.4 | 26.4 | 26.5 | 26.5 | 1.3991 | 0.5293 | gi 635116390 | aldo-keto reductase family 1 member B10-like isoform X3              |
| 15.5 | 15.4 | 14.3 | 15.1 | 15.3 | 15.6 | 1.8851 | 0.5294 | gi 635090328 | ubiquitin-conjugating enzyme E2 O isoform X1                         |
| 20.8 | 20.8 | 21.9 | 21.5 | 21.1 | 21.7 | 1.9057 | 0.5309 | gi 635128109 | epididymal secretory protein E1                                      |
| 15.0 | 16.5 | 15.3 | 15.0 | 16.5 | 16.7 | 2.9476 | 0.5312 | gi 635121922 | mycophenolic acid acyl-glucuronide esterase, mitochondrial           |
| 22.6 | 23.4 | 22.8 | 22.7 | 24.2 | 23.1 | 2.2105 | 0.5318 | gi 635139904 | cytochrome P450 3A5 isoform X1                                       |
| 19.2 | 19.3 | 19.3 | 18.8 | 19.4 | 19.2 | 0.7568 | 0.5323 | gi 635116226 | ubiquitin-conjugating enzyme E2 H isoform X2                         |
| 19.9 | 20.3 | 19.8 | 19.4 | 20.2 | 19.8 | 0.6245 | 0.5324 | gi 635070795 | protein SET                                                          |
| 20.6 | 21.5 | 20.2 | 19.5 | 20.4 | 21.1 | 0.3881 | 0.5324 | gi 635029061 | dihydrofolate reductase isoform X2                                   |
| 22.0 | 22.2 | 19.5 | 21.8 | 21.8 | 21.8 | 3.8323 | 0.5326 | gi 635146703 | B-cell receptor-associated protein 31                                |
| 19.9 | 19.7 | 19.3 | 19.9 | 19.9 | 19.5 | 1.3984 | 0.5337 | gi 635066493 | elongation factor Ts, mitochondrial isoform X2                       |
| 16.6 | 17.1 | 15.9 | 16.7 | 17.0 | 16.7 | 1.7602 | 0.5338 | gi 635129880 | serine palmitoyltransferase 2                                        |
| 23.2 | 24.4 | 23.7 | 23.4 | 23.6 | 23.4 | 0.5701 | 0.5344 | gi 635135319 | tropomyosin alpha-1 chain isoform X6                                 |
| 22.6 | 22.9 | 22.4 | 22.4 | 22.6 | 22.5 | 0.7959 | 0.5348 | gi 635096172 | spliceosome RNA helicase DDX39B isoform X1                           |
| 21.7 | 21.8 | 21.5 | 21.5 | 22.3 | 21.8 | 1.5015 | 0.5349 | gi 635063148 | prohibitin-2                                                         |
| 15.9 | 16.4 | 15.2 | 15.6 | 16.2 | 16.7 | 2.0546 | 0.5351 | gi 635013032 | cleavage and polyadenylation specificity factor subunit 7 isoform X4 |
| 18.4 | 18.6 | 18.4 | 18.3 | 18.6 | 18.3 | 0.8165 | 0.5362 | gi 635030178 | enoyl-CoA delta isomerase 1, mitochondrial                           |
| 14.5 | 16.2 | 15.3 | 15.4 | 17.1 | 15.1 | 3.3977 | 0.5363 | gi 635057035 | delta-1-pyrroline-5-carboxylate synthase                             |
| 21.3 | 21.6 | 21.0 | 21.3 | 21.7 | 21.4 | 1.3913 | 0.5365 | gi 635072681 | talin-1 isoform X2                                                   |
| 16.8 | 16.8 | 16.7 | 16.6 | 17.0 | 16.2 | 0.6860 | 0.5367 | gi 635088772 | ras-related protein Rab-34 isoform X6                                |
| 26.8 | 27.5 | 27.1 | 27.1 | 27.4 | 27.4 | 1.4307 | 0.5382 | gi 635116374 | aldose reductase                                                     |
| 20.1 | 20.9 | 20.5 | 20.2 | 20.2 | 20.6 | 0.6691 | 0.5406 | gi 635108546 | nuclear autoantigenic sperm protein isoform X2                       |
| 15.6 | 15.9 | 14.1 | 15.0 | 16.3 | 15.7 | 2.7757 | 0.5407 | gi 635073860 | pumilio domain-containing protein KIAA0020 homolog                   |
| 15.3 | 16.2 | 14.6 | 15.2 | 16.4 | 15.7 | 2.3608 | 0.5408 | gi 635092121 | interferon-induced 35 kDa protein                                    |
| 20.7 | 21.0 | 19.8 | 19.8 | 20.4 | 20.4 | 0.5151 | 0.5414 | gi 635123134 | transmembrane emp24 domain-containing protein 7                      |
| 18.8 | 19.5 | 19.0 | 18.3 | 19.2 | 19.1 | 0.5774 | 0.5425 | gi 635015806 | neuroblast differentiation-associated protein AHNAK                  |
| 23.1 | 23.7 | 23.3 | 24.0 | 23.6 | 23.2 | 1.5503 | 0.5425 | gi 635035458 | 60S ribosomal protein L36                                            |
| 18.2 | 17.5 | 16.6 | 17.3 | 18.1 | 17.8 | 2.2492 | 0.5431 | gi 635039167 | heterogeneous nuclear ribonucleoprotein U-like protein 1 isoform X3  |
| 20.1 | 22.3 | 20.6 | 21.6 | 22.1 | 20.8 | 3.2795 | 0.5435 | gi 635078256 | proteasome subunit beta type-1                                       |
| 21.1 | 21.6 | 20.9 | 21.0 | 21.4 | 20.5 | 0.6071 | 0.5455 | gi 635086547 | transferrin receptor protein 1 isoform X3                            |
| 14.8 | 14.6 | 14.0 | 14.3 | 14.6 | 13.8 | 0.5956 | 0.5464 | gi 635066271 | prolow-density lipoprotein receptor-related protein 1                |
| 24.9 | 25.2 | 25.0 | 25.3 | 25.4 | 24.8 | 1.3642 | 0.5470 | gi 635048663 | 60S ribosomal protein L7                                             |
| 20.3 | 18.5 | 18.2 | 19.7 | 19.5 | 19.2 | 2.8014 | 0.5473 | gi 635140201 | fascin                                                               |
| 15.2 | 15.9 | 15.3 | 15.0 | 16.2 | 16.1 | 2.0265 | 0.5474 | gi 635024086 | formimidoyltransferase-cyclodeaminase isoform X2                     |
| 20.2 | 22.0 | 21.9 | 21.8 | 21.9 | 21.5 | 2.4082 | 0.5477 | gi 635038369 | calpain small subunit 1                                              |
| 17.8 | 19.2 | 17.2 | 18.0 | 19.1 | 18.5 | 2.7713 | 0.5496 | gi 635055363 | transmembrane 9 superfamily member 3                                 |
| 19.1 | 18.7 | 18.0 | 18.7 | 16.5 | 18.9 | 0.2932 | 0.5504 | gi 635018164 | sodium/potassium-transporting ATPase subunit gamma isoform X3        |

|      |      |      |      |      |      |        |        |              |                                                                         |
|------|------|------|------|------|------|--------|--------|--------------|-------------------------------------------------------------------------|
| 26.5 | 27.0 | 27.0 | 27.1 | 26.9 | 26.9 | 1.3146 | 0.5505 | gi 635108560 | peroxiredoxin-1                                                         |
| 20.0 | 19.9 | 19.5 | 19.9 | 20.1 | 19.7 | 1.3155 | 0.5510 | gi 635068288 | aldehyde dehydrogenase, mitochondrial isoform X2                        |
| 18.0 | 17.7 | 17.3 | 17.3 | 17.6 | 17.6 | 0.7077 | 0.5512 | gi 635049530 | V-type proton ATPase subunit C 1                                        |
| 22.5 | 22.9 | 22.1 | 22.6 | 22.9 | 22.4 | 1.4827 | 0.5519 | gi 635060532 | X-ray repair cross-complementing protein 5                              |
| 20.0 | 20.0 | 18.3 | 20.2 | 19.8 | 19.5 | 2.4388 | 0.5521 | gi 635111222 | succinate dehydrogenase [ubiquinone] iron-sulfur subunit, mitochondrial |
| 13.5 | 15.3 | 12.9 | 13.1 | 16.0 | 14.7 | 5.1043 | 0.5537 | gi 635081531 | protein FAM98A                                                          |
| 21.7 | 21.8 | 21.0 | 21.3 | 21.6 | 20.9 | 0.6294 | 0.5540 | gi 635101098 | gamma-glutamyltranspeptidase 1 isoform X2                               |
| 27.3 | 27.5 | 27.1 | 27.3 | 27.7 | 27.3 | 1.2961 | 0.5546 | gi 635111848 | alpha-enolase                                                           |
| 20.6 | 21.1 | 20.7 | 20.6 | 20.5 | 20.9 | 0.7500 | 0.5556 | gi 635068162 | sarcoplasmic/endoplasmic reticulum calcium ATPase 2 isoform X3          |
| 20.4 | 20.5 | 20.2 | 20.1 | 20.7 | 20.0 | 0.7225 | 0.5556 | gi 635028747 | transportin-1 isoform X2                                                |
| 21.8 | 22.0 | 21.7 | 21.7 | 21.9 | 21.6 | 0.8140 | 0.5576 | gi 635018272 | coatamer subunit delta isoform X1                                       |
| 24.9 | 25.4 | 25.0 | 24.9 | 26.5 | 25.0 | 2.1740 | 0.5582 | gi 635120083 | 40S ribosomal protein S20                                               |
| 20.6 | 20.6 | 20.3 | 19.9 | 19.1 | 21.2 | 0.4018 | 0.5583 | gi 635092779 | LIM and SH3 domain protein 1 isoform X1                                 |
| 21.9 | 22.1 | 22.1 | 22.0 | 22.1 | 22.3 | 1.2027 | 0.5585 | gi 635139733 | guanine nucleotide-binding protein G(I)/G(S)/G(T) subunit beta-2        |
| 21.3 | 22.0 | 21.6 | 21.6 | 21.6 | 21.2 | 0.7125 | 0.5602 | gi 635117452 | GTP-binding protein Rheb isoform X2                                     |
| 20.6 | 20.3 | 19.9 | 19.9 | 20.3 | 20.2 | 0.7034 | 0.5629 | gi 635098769 | 3-ketoacyl-CoA thiolase, mitochondrial                                  |
| 22.3 | 22.5 | 21.7 | 22.0 | 22.1 | 21.9 | 0.6910 | 0.5641 | gi 635033323 | 26S proteasome non-ATPase regulatory subunit 7                          |
| 17.8 | 18.4 | 17.4 | 17.7 | 18.4 | 18.1 | 1.6473 | 0.5642 | gi 635086757 | pre-mRNA-processing-splicing factor 8                                   |
| 21.3 | 21.7 | 21.2 | 21.4 | 21.4 | 21.1 | 0.7835 | 0.5648 | gi 635127484 | C-1-tetrahydrofolate synthase, cytoplasmic isoform X1                   |
| 21.0 | 22.2 | 21.8 | 21.8 | 21.9 | 22.0 | 1.6624 | 0.5651 | gi 635132036 | actin-related protein 2/3 complex subunit 5                             |
| 17.4 | 17.3 | 17.4 | 18.0 | 17.4 | 15.0 | 0.2669 | 0.5664 | gi 635030003 | hydroxyacylglutathione hydrolase, mitochondrial isoform X3              |
| 19.3 | 20.9 | 19.8 | 20.5 | 20.0 | 20.5 | 2.1054 | 0.5666 | gi 635032481 | cleavage and polyadenylation specificity factor subunit 5               |
| 13.9 | 14.3 | 13.6 | 13.6 | 14.8 | 14.1 | 1.7888 | 0.5668 | gi 635088898 | ARF GTPase-activating protein GIT1 isoform X1                           |
| 19.1 | 19.0 | 20.8 | 20.0 | 19.5 | 20.9 | 2.8571 | 0.5677 | gi 635052355 | ras-related protein Rab-18 isoform X3                                   |
| 20.6 | 21.6 | 20.9 | 21.0 | 21.2 | 21.6 | 1.5815 | 0.5679 | gi 635038809 | eukaryotic translation initiation factor 3 subunit K isoform X1         |
| 19.5 | 17.7 | 17.9 | 18.9 | 18.4 | 18.8 | 2.2737 | 0.5682 | gi 635079986 | sepiapterin reductase                                                   |
| 17.3 | 17.6 | 16.7 | 16.9 | 17.9 | 17.6 | 1.7526 | 0.5683 | gi 635090444 | signal recognition particle subunit SRP68 isoform X1                    |
| 18.1 | 18.6 | 18.1 | 18.1 | 18.0 | 18.3 | 0.7556 | 0.5696 | gi 635138602 | wolframin                                                               |
| 20.0 | 21.3 | 20.5 | 20.8 | 20.7 | 21.1 | 1.7387 | 0.5698 | gi 635143925 | ubiquilin-2                                                             |
| 21.4 | 22.2 | 21.9 | 21.6 | 21.6 | 21.9 | 0.7038 | 0.5701 | gi 635134829 | acidic leucine-rich nuclear phosphoprotein 32 family member A           |
| 21.6 | 20.9 | 20.9 | 21.1 | 21.5 | 21.3 | 1.4272 | 0.5704 | gi 635014368 | eukaryotic translation initiation factor 3 subunit M                    |
| 21.7 | 21.5 | 21.2 | 21.3 | 21.9 | 21.6 | 1.3889 | 0.5705 | gi 635046283 | alcohol dehydrogenase class-3                                           |
| 24.6 | 25.1 | 24.8 | 24.8 | 25.0 | 25.1 | 1.2995 | 0.5714 | gi 635016430 | 40S ribosomal protein S3                                                |
| 19.8 | 19.9 | 19.8 | 19.7 | 19.9 | 20.0 | 1.1435 | 0.5722 | gi 635043400 | protein transport protein Sec31A isoform X17                            |
| 17.9 | 19.0 | 18.4 | 18.2 | 18.9 | 19.0 | 1.8005 | 0.5732 | gi 635094971 | inactive tyrosine-protein kinase 7 isoform X3                           |
| 18.4 | 17.9 | 18.0 | 18.7 | 17.8 | 18.3 | 1.5559 | 0.5739 | gi 635066035 | extended synaptotagmin-1 isoform X2                                     |
| 18.7 | 18.2 | 17.3 | 18.4 | 18.4 | 18.1 | 1.7691 | 0.5742 | gi 635060726 | cell differentiation protein RCD1 homolog isoform X2                    |
| 19.4 | 19.0 | 18.8 | 19.0 | 19.2 | 19.4 | 1.3434 | 0.5749 | gi 635078586 | cytochrome c oxidase subunit 5B, mitochondrial                          |
| 23.4 | 23.9 | 23.1 | 23.4 | 23.8 | 23.6 | 1.4548 | 0.5758 | gi 635082905 | 40S ribosomal protein S7                                                |
| 25.1 | 25.0 | 25.0 | 24.7 | 25.1 | 25.0 | 0.8390 | 0.5763 | gi 635076368 | 40S ribosomal protein S12                                               |
| 21.7 | 22.6 | 22.1 | 21.4 | 22.2 | 22.1 | 0.6009 | 0.5766 | gi 635142479 | histone-binding protein RBBP7 isoform X2                                |

|      |      |      |      |      |      |        |        |              |                                                                          |
|------|------|------|------|------|------|--------|--------|--------------|--------------------------------------------------------------------------|
| 20.9 | 21.7 | 21.6 | 21.3 | 21.2 | 21.3 | 0.6922 | 0.5768 | gi 635127684 | eukaryotic translation initiation factor 2 subunit 1                     |
| 21.1 | 21.6 | 21.4 | 20.9 | 21.8 | 22.1 | 1.6874 | 0.5771 | gi 635115790 | caveolin-1 isoform X2                                                    |
| 19.4 | 20.1 | 19.5 | 19.6 | 20.0 | 19.9 | 1.4258 | 0.5799 | gi 635017590 | acetyl-CoA acetyltransferase, mitochondrial                              |
| 18.4 | 17.4 | 16.8 | 18.5 | 18.2 | 17.1 | 2.3821 | 0.5799 | gi 635051365 | prostaglandin F synthase 1-like                                          |
| 22.3 | 22.8 | 22.0 | 22.3 | 22.9 | 22.3 | 1.5352 | 0.5804 | gi 635127211 | proteasome subunit alpha type-3                                          |
| 22.0 | 22.5 | 22.0 | 22.0 | 22.1 | 22.2 | 0.8126 | 0.5805 | gi 635036777 | tropomyosin alpha-4 chain isoform X2                                     |
| 15.9 | 17.2 | 15.3 | 15.9 | 17.3 | 16.5 | 2.5950 | 0.5812 | gi 635077491 | E3 UFM1-protein ligase 1 isoform X2                                      |
| 14.7 | 15.5 | 14.2 | 14.4 | 15.5 | 15.5 | 2.0615 | 0.5816 | gi 635101879 | F-box only protein 7 isoform X3                                          |
| 21.6 | 22.6 | 21.5 | 22.1 | 22.5 | 21.9 | 1.7625 | 0.5823 | gi 635120395 | ADP-ribosylation factor-like protein 8B                                  |
| 24.2 | 24.5 | 23.9 | 24.1 | 24.5 | 24.4 | 1.3338 | 0.5833 | gi 635134960 | 60S ribosomal protein L4                                                 |
| 21.7 | 22.2 | 20.1 | 21.5 | 21.7 | 21.9 | 2.3899 | 0.5833 | gi 51104726  | cytochrome oxidase subunit II, partial (mitochondrion)                   |
| 13.8 | 14.6 | 14.2 | 13.6 | 14.3 | 14.1 | 0.6632 | 0.5835 | gi 635127473 | nesprin-2 isoform X9                                                     |
| 24.7 | 24.9 | 24.4 | 24.7 | 24.9 | 24.8 | 1.2175 | 0.5836 | gi 635119400 | transketolase                                                            |
| 16.9 | 15.6 | 14.1 | 15.4 | 17.5 | 15.7 | 4.2153 | 0.5836 | gi 635110233 | replication protein A 32 kDa subunit                                     |
| 17.7 | 17.3 | 16.9 | 17.5 | 16.6 | 17.2 | 0.6217 | 0.5848 | gi 635139851 | DNA replication licensing factor MCM7 isoform X1                         |
| 23.9 | 24.3 | 23.8 | 23.9 | 23.9 | 23.9 | 0.8257 | 0.5850 | gi 635066769 | T-complex protein 1 subunit beta isoform X1                              |
| 20.3 | 20.4 | 19.8 | 20.0 | 20.5 | 20.4 | 1.4109 | 0.5850 | gi 635036020 | hsp90 co-chaperone Cdc37                                                 |
| 22.4 | 22.6 | 22.0 | 22.2 | 22.8 | 22.4 | 1.4179 | 0.5852 | gi 635026294 | importin-5                                                               |
| 21.6 | 22.5 | 24.0 | 22.8 | 24.8 | 22.3 | 4.1144 | 0.5863 | gi 635147201 | histone H2B type 2-F isoform X2                                          |
| 20.6 | 22.0 | 21.9 | 20.3 | 21.8 | 21.3 | 0.4144 | 0.5868 | gi 635088740 | fructose-bisphosphate aldolase C isoform X2                              |
| 18.6 | 19.9 | 19.3 | 19.3 | 19.6 | 19.6 | 1.7156 | 0.5876 | gi 635084230 | importin subunit alpha-3                                                 |
| 24.4 | 25.0 | 24.9 | 24.6 | 24.9 | 25.3 | 1.4221 | 0.5880 | gi 635086799 | 14-3-3 protein epsilon isoform X1                                        |
| 20.8 | 21.2 | 20.3 | 20.6 | 21.0 | 20.1 | 0.6200 | 0.5882 | gi 635126915 | glycogen phosphorylase, liver form isoform X2                            |
| 17.2 | 17.5 | 16.2 | 16.9 | 17.7 | 17.2 | 1.8433 | 0.5890 | gi 635015830 | nuclear pore complex protein Nup160                                      |
| 15.6 | 16.1 | 15.1 | 15.3 | 16.5 | 15.9 | 1.8245 | 0.5896 | gi 635070647 | torsin-1A                                                                |
| 24.0 | 23.9 | 23.4 | 23.6 | 23.9 | 24.2 | 1.3994 | 0.5902 | gi 635053733 | 40S ribosomal protein S24 isoform X10                                    |
| 19.1 | 20.0 | 19.8 | 19.3 | 19.7 | 19.4 | 0.6688 | 0.5902 | gi 635073970 | cAMP-dependent protein kinase catalytic subunit gamma                    |
| 17.0 | 16.9 | 16.7 | 16.6 | 16.9 | 16.9 | 0.8230 | 0.5904 | gi 635145965 | fragile X mental retardation protein 1 isoform X9                        |
| 19.5 | 21.8 | 19.4 | 20.1 | 19.6 | 19.6 | 0.3395 | 0.5907 | gi 635113388 | synaptobrevin homolog YKT6 isoform X2                                    |
| 20.7 | 19.6 | 19.0 | 19.9 | 20.4 | 19.9 | 2.0004 | 0.5912 | gi 635116405 | bisphosphoglycerate mutase                                               |
| 26.3 | 27.0 | 26.5 | 26.6 | 26.4 | 26.3 | 0.7202 | 0.5927 | gi 635104814 | protein S100-A6                                                          |
| 19.8 | 21.2 | 20.7 | 20.6 | 20.5 | 19.8 | 0.5165 | 0.5940 | gi 635125681 | transmembrane emp24 domain-containing protein 9                          |
| 22.8 | 23.1 | 20.0 | 22.4 | 23.3 | 22.1 | 4.1303 | 0.5945 | gi 635125079 | 60S ribosomal protein L3-like                                            |
| 17.9 | 17.5 | 16.3 | 17.8 | 18.5 | 16.6 | 2.6416 | 0.5954 | gi 635051852 | ras suppressor protein 1 isoform X4                                      |
| 24.0 | 23.8 | 23.5 | 23.5 | 23.6 | 24.0 | 0.7679 | 0.5956 | gi 635072402 | acidic leucine-rich nuclear phosphoprotein 32 family member B isoform X2 |
| 22.2 | 22.8 | 22.4 | 22.3 | 22.5 | 22.2 | 0.7728 | 0.5962 | gi 635135038 | ras-related protein Rab-11A                                              |
| 24.4 | 25.1 | 24.7 | 24.9 | 24.9 | 24.8 | 1.3189 | 0.5966 | gi 635067688 | endoplasmic                                                              |
| 20.3 | 21.7 | 20.2 | 20.4 | 21.0 | 19.6 | 0.4424 | 0.5971 | gi 635093564 | THO complex subunit 4                                                    |
| 20.9 | 21.4 | 21.5 | 21.2 | 21.4 | 21.6 | 1.3739 | 0.5974 | gi 635087097 | proteasome subunit beta type-6 isoform X1                                |
| 20.3 | 20.4 | 18.8 | 19.1 | 19.6 | 19.8 | 0.4848 | 0.5977 | gi 635103362 | NADH-cytochrome b5 reductase 3                                           |
| 21.2 | 19.0 | 19.0 | 19.3 | 19.3 | 19.2 | 0.3777 | 0.5992 | gi 635079368 | copine-2-like                                                            |

|      |      |      |      |      |      |        |        |              |                                                                             |
|------|------|------|------|------|------|--------|--------|--------------|-----------------------------------------------------------------------------|
| 20.3 | 20.3 | 19.3 | 19.1 | 19.9 | 20.1 | 0.5488 | 0.5993 | gi 635124885 | ras GTPase-activating protein-binding protein 1 isoform X2                  |
| 20.4 | 20.2 | 18.8 | 19.4 | 20.3 | 20.8 | 2.3268 | 0.6008 | gi 635081584 | protein dpy-30 homolog isoform X3                                           |
| 21.8 | 22.3 | 22.0 | 21.7 | 22.1 | 22.0 | 0.7855 | 0.6013 | gi 635040300 | ruvB-like 2 isoform X1                                                      |
| 21.8 | 22.1 | 21.7 | 21.6 | 21.9 | 21.9 | 0.8122 | 0.6018 | gi 635062203 | septin-2                                                                    |
| 22.3 | 22.6 | 22.2 | 22.3 | 22.4 | 22.6 | 1.2374 | 0.6022 | gi 635122198 | 60S ribosomal protein L24                                                   |
| 17.9 | 18.6 | 18.2 | 18.2 | 18.4 | 18.3 | 1.2790 | 0.6023 | gi 635052760 | presequence protease, mitochondrial                                         |
| 21.1 | 22.0 | 20.5 | 21.0 | 21.8 | 21.7 | 1.9492 | 0.6026 | gi 635048336 | ras-related protein Rab-2A isoform X1                                       |
| 20.5 | 20.1 | 19.7 | 20.0 | 20.5 | 20.2 | 1.4408 | 0.6029 | gi 635013418 | FACT complex subunit SSRP1                                                  |
| 21.4 | 22.0 | 21.5 | 21.6 | 21.8 | 21.8 | 1.2585 | 0.6033 | gi 635054135 | annexin A7 isoform X2                                                       |
| 21.3 | 22.1 | 20.5 | 20.9 | 21.7 | 20.0 | 0.4142 | 0.6042 | gi 635109874 | KH domain-containing, RNA-binding, signal transduction-associated protein 1 |
| 18.7 | 18.7 | 17.9 | 18.6 | 18.7 | 18.6 | 1.4300 | 0.6046 | gi 635083921 | neutral cholesterol ester hydrolase 1                                       |
| 22.7 | 23.8 | 23.0 | 23.0 | 23.5 | 23.6 | 1.6288 | 0.6049 | gi 635099704 | small nuclear ribonucleoprotein Sm D1                                       |
| 18.7 | 19.6 | 18.9 | 19.1 | 19.4 | 19.2 | 1.4516 | 0.6050 | gi 635082031 | trifunctional enzyme subunit alpha, mitochondrial                           |
| 24.2 | 24.3 | 23.8 | 24.1 | 24.2 | 24.2 | 1.2292 | 0.6054 | gi 635038961 | 40S ribosomal protein S16                                                   |
| 22.4 | 21.8 | 21.7 | 22.1 | 22.4 | 21.9 | 1.3732 | 0.6059 | gi 635120567 | actin-related protein 2/3 complex subunit 4 isoform X3                      |
| 25.7 | 25.8 | 25.4 | 25.6 | 25.9 | 25.7 | 1.1845 | 0.6066 | gi 635139449 | malate dehydrogenase, mitochondrial isoform X1                              |
| 20.7 | 19.9 | 19.6 | 20.0 | 20.7 | 20.1 | 1.6508 | 0.6082 | gi 635080395 | UTP--glucose-1-phosphate uridylyltransferase isoform X3                     |
| 20.9 | 21.3 | 20.8 | 20.9 | 21.0 | 20.8 | 0.8052 | 0.6083 | gi 635086028 | programmed cell death 6-interacting protein isoform X2                      |
| 19.4 | 20.3 | 19.9 | 20.5 | 19.9 | 19.7 | 1.5552 | 0.6085 | gi 635067417 | leukotriene A-4 hydrolase isoform X3                                        |
| 24.0 | 24.3 | 23.9 | 23.9 | 24.0 | 24.1 | 0.8272 | 0.6090 | gi 635061448 | nucleolin                                                                   |
| 23.2 | 22.8 | 22.2 | 23.0 | 22.9 | 22.7 | 1.4610 | 0.6091 | gi 635056476 | thioredoxin-dependent peroxide reductase, mitochondrial                     |
| 14.1 | 15.2 | 14.4 | 13.9 | 15.3 | 15.4 | 2.0540 | 0.6098 | gi 635106586 | glomulin isoform X3                                                         |
| 15.3 | 17.8 | 18.3 | 18.4 | 17.1 | 17.5 | 3.5018 | 0.6111 | gi 635092387 | dnaJ homolog subfamily C member 7 isoform X3                                |
| 19.3 | 20.0 | 19.0 | 19.0 | 19.7 | 19.0 | 0.6243 | 0.6130 | gi 635072392 | sialic acid synthase                                                        |
| 20.2 | 19.8 | 19.4 | 20.1 | 19.5 | 20.2 | 1.5074 | 0.6132 | gi 635100421 | BH3-interacting domain death agonist isoform X3                             |
| 21.0 | 21.9 | 21.4 | 22.0 | 22.0 | 21.0 | 1.6914 | 0.6139 | gi 635109711 | adenylate kinase 2, mitochondrial isoform X3                                |
| 22.7 | 22.9 | 22.4 | 22.7 | 22.5 | 23.1 | 1.3247 | 0.6146 | gi 635086597 | 60S ribosomal protein L35a isoform X2                                       |
| 25.6 | 25.8 | 25.6 | 25.6 | 25.8 | 25.8 | 1.1220 | 0.6149 | gi 635014753 | L-lactate dehydrogenase A chain isoform X1                                  |
| 18.5 | 17.6 | 17.2 | 18.0 | 17.9 | 18.0 | 1.6154 | 0.6154 | gi 635054551 | phenazine biosynthesis-like domain-containing protein isoform X3            |
| 23.1 | 23.9 | 23.7 | 23.2 | 23.3 | 23.6 | 0.7018 | 0.6167 | gi 635078830 | 60S ribosomal protein L31                                                   |
| 13.0 | 13.7 | 10.8 | 12.4 | 13.9 | 12.7 | 3.3549 | 0.6170 | gi 635081111 | thyroid adenoma-associated protein isoform X6                               |
| 19.0 | 18.7 | 17.9 | 18.4 | 19.0 | 18.8 | 1.6074 | 0.6192 | gi 635072850 | stomatin-like protein 2, mitochondrial                                      |
| 17.6 | 18.7 | 18.1 | 18.3 | 18.1 | 17.5 | 0.6123 | 0.6194 | gi 635082029 | trifunctional enzyme subunit beta, mitochondrial                            |
| 20.5 | 22.4 | 20.5 | 21.9 | 21.8 | 20.8 | 2.4503 | 0.6197 | gi 635038851 | heterogeneous nuclear ribonucleoprotein L isoform X4                        |
| 19.7 | 20.4 | 18.1 | 19.4 | 20.2 | 19.7 | 2.4097 | 0.6202 | gi 635030879 | ribosomal L1 domain-containing protein 1                                    |
| 23.1 | 24.1 | 23.6 | 23.1 | 23.9 | 23.2 | 0.6307 | 0.6209 | gi 635106063 | proteasome subunit alpha type-5 isoform X1                                  |
| 19.5 | 22.8 | 22.0 | 21.5 | 22.3 | 22.0 | 3.3964 | 0.6222 | gi 635022058 | destrin                                                                     |
| 15.6 | 15.3 | 12.9 | 12.2 | 15.6 | 13.9 | 0.2018 | 0.6223 | gi 635027852 | nuclear pore complex protein Nup155                                         |
| 21.4 | 21.8 | 21.3 | 21.1 | 21.4 | 21.6 | 0.7858 | 0.6225 | gi 635065615 | prefoldin subunit 5                                                         |
| 21.4 | 21.8 | 21.7 | 21.1 | 21.7 | 21.7 | 0.7409 | 0.6227 | gi 635119955 | 26S proteasome non-ATPase regulatory subunit 6 isoform X1                   |
| 17.3 | 17.6 | 15.6 | 16.1 | 18.2 | 17.6 | 2.9344 | 0.6228 | gi 635043215 | annexin A3                                                                  |



|      |      |      |      |      |      |        |        |              |                                                                          |
|------|------|------|------|------|------|--------|--------|--------------|--------------------------------------------------------------------------|
| 19.3 | 19.8 | 18.9 | 19.2 | 19.1 | 19.2 | 0.7128 | 0.6237 | gi 635011135 | AP-2 complex subunit alpha-2 isoform X3                                  |
| 19.9 | 19.7 | 19.4 | 19.4 | 19.8 | 19.5 | 0.8145 | 0.6245 | gi 635145500 | apoptosis-inducing factor 1, mitochondrial isoform X2                    |
| 14.4 | 14.6 | 13.6 | 13.9 | 14.5 | 14.8 | 1.6284 | 0.6245 | gi 635141099 | protein unc-45 homolog A isoform X4                                      |
| 19.1 | 19.4 | 18.8 | 19.3 | 19.4 | 18.9 | 1.3192 | 0.6256 | gi 635039000 | rRNA 2-O-methyltransferase fibrillarin                                   |
| 17.7 | 19.7 | 20.8 | 19.8 | 19.0 | 17.7 | 0.2643 | 0.6262 | gi 635119169 | aminoacylase-1 isoform X4                                                |
| 19.5 | 20.3 | 19.7 | 20.1 | 19.0 | 19.7 | 0.6219 | 0.6268 | gi 635090143 | integrin alpha-3 isoform X1                                              |
| 20.3 | 21.4 | 19.8 | 20.6 | 20.8 | 20.9 | 1.7649 | 0.6278 | gi 635045558 | translation machinery-associated protein 16 isoform X2                   |
| 20.9 | 20.5 | 20.1 | 20.2 | 20.6 | 20.2 | 0.7238 | 0.6279 | gi 635147704 | lysosome-associated membrane glycoprotein 2 isoform X3                   |
| 19.8 | 19.6 | 19.2 | 19.4 | 19.8 | 19.8 | 1.3180 | 0.6285 | gi 635060903 | tubulin alpha-4A chain isoform X3                                        |
| 21.7 | 20.3 | 20.4 | 20.7 | 21.0 | 21.4 | 1.7967 | 0.6290 | gi 635011413 | nucleosome assembly protein 1-like 4 isoform X5                          |
| 21.7 | 21.8 | 21.2 | 21.4 | 21.6 | 21.6 | 0.7860 | 0.6297 | gi 635145809 | RNA-binding motif protein, X chromosome isoform X2                       |
| 26.3 | 26.2 | 26.0 | 26.3 | 26.1 | 26.1 | 0.8666 | 0.6299 | gi 635102142 | galectin-1                                                               |
| 22.8 | 23.0 | 22.6 | 22.7 | 23.1 | 22.7 | 1.2298 | 0.6301 | gi 635051439 | rab GDP dissociation inhibitor beta                                      |
| 18.8 | 18.4 | 18.6 | 18.8 | 17.5 | 18.7 | 0.6020 | 0.6320 | gi 635123720 | GTP-binding protein SAR1b isoform X2                                     |
| 21.2 | 22.2 | 21.9 | 21.7 | 21.9 | 21.1 | 0.6215 | 0.6327 | gi 635015024 | proteasome subunit alpha type-1 isoform X2                               |
| 24.3 | 24.8 | 24.4 | 24.1 | 24.7 | 24.4 | 0.7639 | 0.6333 | gi 635131696 | phosphoglycerate mutase 1                                                |
| 14.3 | 14.3 | 13.3 | 13.9 | 14.4 | 14.2 | 1.5359 | 0.6345 | gi 635073737 | ran-binding protein 6 isoform X2                                         |
| 21.7 | 23.0 | 22.9 | 21.6 | 24.0 | 23.3 | 2.5900 | 0.6350 | gi 635096734 | histone H2A type 1-H                                                     |
| 14.8 | 15.6 | 14.4 | 14.8 | 15.3 | 15.3 | 1.6211 | 0.6353 | gi 635014300 | N-acetyltransferase 10                                                   |
| 17.5 | 17.6 | 16.9 | 16.8 | 17.3 | 17.4 | 0.7029 | 0.6360 | gi 635066600 | N-acetylglucosamine-6-sulfatase                                          |
| 22.1 | 22.6 | 22.6 | 22.3 | 22.4 | 22.2 | 0.8019 | 0.6365 | gi 635142711 | eukaryotic translation initiation factor 1A, X-chromosomal               |
| 17.8 | 19.2 | 20.0 | 19.6 | 18.3 | 18.0 | 0.3897 | 0.6379 | gi 635129566 | eukaryotic translation initiation factor 5 isoform X2                    |
| 23.1 | 23.9 | 23.2 | 23.5 | 23.8 | 23.4 | 1.3971 | 0.6381 | gi 635130058 | ADP-ribosylation factor 1 isoform X3                                     |
| 22.8 | 22.9 | 22.6 | 22.5 | 22.8 | 22.9 | 0.8313 | 0.6395 | gi 635058664 | lupus La protein                                                         |
| 19.4 | 20.2 | 19.5 | 20.2 | 20.0 | 19.4 | 1.4982 | 0.6404 | gi 635033049 | alanine--tRNA ligase, cytoplasmic                                        |
| 21.0 | 21.7 | 21.2 | 21.3 | 20.6 | 21.5 | 0.6861 | 0.6408 | gi 635103350 | eukaryotic translation initiation factor 3 subunit L                     |
| 20.4 | 20.1 | 19.7 | 20.0 | 20.3 | 20.3 | 1.2918 | 0.6409 | gi 635065975 | ras-related protein Rab-5B                                               |
| 19.3 | 19.9 | 21.0 | 19.6 | 20.1 | 19.7 | 0.5536 | 0.6420 | gi 635092175 | proteasome activator complex subunit 3 isoform X2                        |
| 27.1 | 27.1 | 27.0 | 27.1 | 27.4 | 27.0 | 1.1489 | 0.6431 | gi 635065096 | tubulin alpha-1A chain isoform X2                                        |
| 20.1 | 19.9 | 19.7 | 19.6 | 20.3 | 20.2 | 1.3220 | 0.6432 | gi 635016929 | phosphatidylinositol-binding clathrin assembly protein isoform X13       |
| 15.2 | 15.2 | 14.1 | 14.6 | 15.3 | 15.2 | 1.6452 | 0.6448 | gi 635139031 | cyclin-G-associated kinase isoform X4                                    |
| 22.3 | 22.8 | 22.5 | 22.4 | 22.7 | 22.1 | 0.7859 | 0.6450 | gi 635027616 | activated RNA polymerase II transcriptional coactivator p15              |
| 19.7 | 19.9 | 19.3 | 19.6 | 19.8 | 19.9 | 1.2583 | 0.6456 | gi 635082464 | ATP-dependent RNA helicase DDX1                                          |
| 16.1 | 16.0 | 15.7 | 15.2 | 15.8 | 16.3 | 0.6850 | 0.6473 | gi 635015184 | eukaryotic translation initiation factor 4 gamma 2                       |
| 18.5 | 18.4 | 18.4 | 18.1 | 18.5 | 18.4 | 0.8500 | 0.6474 | gi 635058942 | alkyldihydroxyacetonephosphate synthase, peroxisomal isoform X3          |
| 19.0 | 18.9 | 18.6 | 18.7 | 19.3 | 18.8 | 1.3001 | 0.6483 | gi 635081793 | protein phosphatase 1G                                                   |
| 21.0 | 22.1 | 21.3 | 21.4 | 21.0 | 21.4 | 0.6782 | 0.6490 | gi 635116647 | putative RNA-binding protein Luc7-like 2 isoform X5                      |
| 19.8 | 19.2 | 18.6 | 19.2 | 19.4 | 19.6 | 1.4877 | 0.6495 | gi 635028098 | succinate dehydrogenase [ubiquinone] flavoprotein subunit, mitochondrial |
| 21.7 | 22.0 | 22.3 | 22.4 | 22.5 | 21.6 | 1.4293 | 0.6499 | gi 635033554 | nuclear transport factor 2 isoform X2                                    |
| 20.6 | 22.2 | 21.2 | 22.3 | 21.9 | 20.8 | 2.0232 | 0.6504 | gi 635065947 | CD63 antigen                                                             |
| 22.9 | 23.0 | 22.8 | 22.4 | 22.7 | 23.2 | 0.7793 | 0.6510 | gi 635100745 | ran-specific GTPase-activating protein isoform X2                        |

|      |      |      |      |      |      |        |        |              |                                                                         |
|------|------|------|------|------|------|--------|--------|--------------|-------------------------------------------------------------------------|
| 24.8 | 24.5 | 24.3 | 24.4 | 24.6 | 24.3 | 0.8461 | 0.6518 | gij635059577 | 60 kDa heat shock protein, mitochondrial                                |
| 18.7 | 18.9 | 18.3 | 18.6 | 18.5 | 19.2 | 1.3504 | 0.6529 | gij635044862 | N-alpha-acetyltransferase 15, NatA auxiliary subunit isoform X3         |
| 19.2 | 19.6 | 19.1 | 19.4 | 19.4 | 19.2 | 1.2152 | 0.6530 | gij635028725 | microtubule-associated protein 1B isoform X3                            |
| 20.1 | 20.7 | 20.0 | 20.2 | 20.6 | 20.4 | 1.3332 | 0.6532 | gij635088315 | serine hydroxymethyltransferase, cytosolic isoform X1                   |
| 25.2 | 25.3 | 25.1 | 25.0 | 25.4 | 25.2 | 1.1514 | 0.6549 | gij635117835 | 60S ribosomal protein L14 isoform X2                                    |
| 19.7 | 21.3 | 20.4 | 20.3 | 20.3 | 20.0 | 0.5924 | 0.6555 | gij635027630 | threonine--tRNA ligase, cytoplasmic isoform X1                          |
| 18.7 | 20.8 | 20.2 | 19.9 | 20.5 | 20.2 | 1.9988 | 0.6556 | gij635147631 | ADP/ATP translocase 2                                                   |
| 20.2 | 20.8 | 20.6 | 20.4 | 20.8 | 20.7 | 1.2447 | 0.6559 | gij635091037 | cAMP-dependent protein kinase type I-alpha regulatory subunit           |
| 26.2 | 26.4 | 26.0 | 26.1 | 26.7 | 26.2 | 1.2927 | 0.6568 | gij635018648 | heat shock cognate 71 kDa protein isoform X3                            |
| 17.5 | 20.8 | 18.4 | 18.0 | 18.5 | 18.8 | 0.3257 | 0.6571 | gij635092393 | 2,3-cyclic-nucleotide 3-phosphodiesterase isoform X2                    |
| 22.6 | 23.2 | 22.7 | 22.8 | 22.7 | 22.7 | 0.8209 | 0.6587 | gij635052592 | integrin beta-1                                                         |
| 17.8 | 18.4 | 17.5 | 17.3 | 18.1 | 17.8 | 0.6829 | 0.6597 | gij635036576 | ATP-dependent RNA helicase DDX39A                                       |
| 21.0 | 20.8 | 20.1 | 20.4 | 21.0 | 20.9 | 1.4133 | 0.6598 | gij635069578 | actin-related protein 2/3 complex subunit 3                             |
| 15.4 | 16.2 | 15.3 | 15.5 | 16.2 | 15.8 | 1.4755 | 0.6599 | gij635087024 | myb-binding protein 1A isoform X1                                       |
| 22.8 | 23.8 | 23.4 | 23.5 | 23.0 | 22.9 | 0.6762 | 0.6601 | gij635071246 | 60S ribosomal protein L35                                               |
| 22.5 | 22.9 | 21.3 | 22.4 | 22.8 | 22.2 | 1.7395 | 0.6602 | gij635133612 | heterogeneous nuclear ribonucleoprotein U isoform X2                    |
| 20.6 | 19.9 | 19.6 | 20.0 | 20.3 | 20.2 | 1.4195 | 0.6606 | gij635044770 | membrane-associated progesterone receptor component 2                   |
| 18.4 | 18.2 | 17.9 | 17.8 | 18.3 | 18.1 | 0.7938 | 0.6608 | gij635043595 | estradiol 17-beta-dehydrogenase 11 isoform X2                           |
| 24.8 | 25.1 | 24.8 | 24.7 | 24.9 | 24.9 | 0.8760 | 0.6612 | gij635035336 | elongation factor 2                                                     |
| 17.7 | 17.8 | 17.4 | 17.8 | 18.0 | 17.4 | 1.2644 | 0.6615 | gij635132241 | torsin-1A-interacting protein 1 isoform X4                              |
| 20.2 | 20.5 | 19.8 | 20.7 | 20.0 | 20.1 | 1.3767 | 0.6618 | gij635123660 | serine/threonine-protein phosphatase 2A catalytic subunit alpha isoform |
| 15.7 | 16.4 | 15.8 | 15.6 | 16.7 | 16.0 | 1.5248 | 0.6619 | gij635124954 | la-related protein 1 isoform X4                                         |
| 20.3 | 20.9 | 21.4 | 20.7 | 21.6 | 20.9 | 1.5889 | 0.6621 | gij635020823 | serine/arginine-rich splicing factor 6                                  |
| 17.9 | 18.2 | 17.8 | 17.5 | 17.9 | 18.1 | 0.8019 | 0.6628 | gij635062945 | condensin complex subunit 1 isoform X2                                  |
| 22.8 | 23.4 | 23.3 | 22.6 | 23.1 | 23.4 | 0.7053 | 0.6629 | gij635120791 | 60S ribosomal protein L32                                               |
| 19.5 | 21.3 | 21.0 | 20.6 | 21.0 | 19.2 | 0.4386 | 0.6631 | gij635110729 | UDP-glucose 4-epimerase isoform X2                                      |
| 15.5 | 16.0 | 15.2 | 15.1 | 16.5 | 15.7 | 1.6406 | 0.6633 | gij635124202 | histidine--tRNA ligase, cytoplasmic                                     |
| 19.7 | 19.5 | 19.1 | 19.3 | 19.6 | 19.8 | 1.2758 | 0.6644 | gij635055592 | aspartate aminotransferase, cytoplasmic                                 |
| 18.5 | 19.2 | 18.0 | 18.3 | 19.1 | 17.6 | 0.5609 | 0.6656 | gij635027677 | ribosome biogenesis protein BRX1 homolog                                |
| 15.4 | 15.6 | 14.6 | 14.8 | 15.8 | 15.5 | 1.5864 | 0.6674 | gij635028426 | importin-11                                                             |
| 18.7 | 18.3 | 18.7 | 19.0 | 18.2 | 19.0 | 1.3666 | 0.6693 | gij635126053 | phosphoenolpyruvate carboxykinase [GTP], mitochondrial isoform X4       |
| 21.8 | 22.2 | 22.0 | 22.2 | 22.2 | 21.9 | 1.1754 | 0.6698 | gij635105509 | sodium/potassium-transporting ATPase subunit alpha-1 isoform X2         |
| 23.6 | 24.2 | 23.5 | 23.3 | 23.9 | 23.7 | 0.7426 | 0.6699 | gij635098964 | ATP synthase subunit alpha, mitochondrial                               |
| 23.3 | 23.2 | 22.7 | 22.8 | 23.1 | 22.9 | 0.8035 | 0.6706 | gij635105760 | F-actin-capping protein subunit alpha-1                                 |
| 22.4 | 22.2 | 21.4 | 21.7 | 22.1 | 21.8 | 0.7055 | 0.6710 | gij635129312 | tryptophan--tRNA ligase, cytoplasmic isoform X2                         |
| 17.0 | 16.7 | 15.9 | 16.3 | 16.9 | 16.9 | 1.4574 | 0.6724 | gij635030710 | 4-aminobutyrate aminotransferase, mitochondrial isoform X5              |
| 24.2 | 25.4 | 24.2 | 24.2 | 24.5 | 24.5 | 0.6506 | 0.6755 | gij635096112 | chloride intracellular channel protein 1                                |
| 24.0 | 24.7 | 24.1 | 24.4 | 24.4 | 24.2 | 1.2504 | 0.6765 | gij635125937 | guanine nucleotide-binding protein subunit beta-2-like 1                |
| 17.5 | 19.0 | 14.7 | 18.4 | 16.2 | 18.7 | 4.6756 | 0.6777 | gij635054706 | cyclin-dependent kinase 1                                               |
| 19.9 | 20.0 | 19.4 | 19.0 | 19.7 | 20.1 | 0.6849 | 0.6778 | gij635086850 | platelet-activating factor acetylhydrolase IB subunit alpha             |
| 23.6 | 23.4 | 23.7 | 23.4 | 23.8 | 23.6 | 1.1443 | 0.6785 | gij635104202 | T-complex protein 1 subunit gamma                                       |

|      |      |      |      |      |      |        |        |              |                                                                                  |
|------|------|------|------|------|------|--------|--------|--------------|----------------------------------------------------------------------------------|
| 23.6 | 23.4 | 23.3 | 23.2 | 23.4 | 23.5 | 0.8678 | 0.6786 | gij635140723 | 40S ribosomal protein S17 isoform X2                                             |
| 18.2 | 18.2 | 17.7 | 18.0 | 18.5 | 17.9 | 1.3119 | 0.6787 | gij635147552 | extended synaptotagmin-2-like                                                    |
| 21.9 | 22.8 | 22.4 | 22.3 | 22.8 | 22.5 | 1.3773 | 0.6793 | gij635025422 | translationally-controlled tumor protein                                         |
| 20.7 | 20.8 | 19.9 | 19.0 | 20.8 | 20.8 | 0.5057 | 0.6806 | gij635126443 | cofilin-2 isoform X3                                                             |
| 23.8 | 23.9 | 23.4 | 23.6 | 23.8 | 23.9 | 1.1971 | 0.6809 | gij635066506 | 40S ribosomal protein S13                                                        |
| 20.0 | 19.9 | 18.1 | 19.6 | 20.2 | 19.1 | 2.0126 | 0.6811 | gij635023773 | splicing factor U2AF 35 kDa subunit isoform X1                                   |
| 22.8 | 23.4 | 23.1 | 23.0 | 23.3 | 23.3 | 1.2134 | 0.6815 | gij635145639 | hypoxanthine-guanine phosphoribosyltransferase                                   |
| 20.0 | 20.6 | 20.0 | 20.3 | 20.5 | 20.1 | 1.2854 | 0.6832 | gij635091770 | glycylpeptide N-tetradecanoyltransferase 1                                       |
| 23.9 | 24.3 | 23.6 | 23.9 | 24.1 | 24.1 | 1.2349 | 0.6837 | gij635072864 | transitional endoplasmic reticulum ATPase isoform X1                             |
| 21.6 | 20.3 | 20.7 | 20.7 | 21.0 | 21.4 | 1.5430 | 0.6842 | gij635044198 | oligosaccharyltransferase complex subunit OSTC isoform X2                        |
| 19.4 | 20.0 | 19.8 | 19.8 | 20.2 | 18.6 | 0.5976 | 0.6858 | gij635069530 | vacuolar protein sorting-associated protein 29-like                              |
| 20.3 | 21.0 | 20.3 | 20.6 | 20.6 | 20.7 | 1.2539 | 0.6862 | gij635140070 | aminoacyl tRNA synthase complex-interacting multifunctional protein 2 isoform X1 |
| 14.9 | 16.0 | 13.7 | 13.5 | 15.8 | 14.2 | 0.3912 | 0.6867 | gij635081618 | EH domain-containing protein 3 isoform X2                                        |
| 15.6 | 16.2 | 15.1 | 15.4 | 16.1 | 15.9 | 1.4765 | 0.6872 | gij635011689 | serine/threonine-protein phosphatase 6 regulatory subunit 3 isoform X13          |
| 21.1 | 21.6 | 21.5 | 21.1 | 21.5 | 21.4 | 0.8121 | 0.6874 | gij635066285 | serine hydroxymethyltransferase, mitochondrial isoform X6                        |
| 18.9 | 18.4 | 17.5 | 18.1 | 19.0 | 18.4 | 1.6057 | 0.6893 | gij635088561 | COP9 signalosome complex subunit 3                                               |
| 13.6 | 12.8 | 13.2 | 12.7 | 13.4 | 14.0 | 1.5160 | 0.6897 | gij635040622 | DNA polymerase delta catalytic subunit isoform X1                                |
| 22.4 | 22.6 | 22.3 | 22.2 | 22.6 | 22.3 | 0.8660 | 0.6901 | gij635144038 | moesin isoform X2                                                                |
| 24.3 | 24.7 | 24.5 | 24.3 | 24.4 | 24.6 | 0.8572 | 0.6902 | gij635080170 | annexin A4                                                                       |
| 19.5 | 20.4 | 19.5 | 19.7 | 20.5 | 19.7 | 1.5151 | 0.6912 | gij635034983 | lamin-B2 isoform X2                                                              |
| 25.3 | 25.6 | 25.3 | 25.3 | 25.6 | 25.6 | 1.1492 | 0.6913 | gij635144463 | phosphoglycerate kinase 1                                                        |
| 19.5 | 20.0 | 19.9 | 20.0 | 19.7 | 19.5 | 0.8108 | 0.6916 | gij635071992 | prostaglandin reductase 1 isoform X2                                             |
| 18.4 | 19.4 | 18.6 | 18.9 | 19.1 | 18.7 | 1.3693 | 0.6917 | gij635032545 | nuclear pore complex protein Nup93 isoform X2                                    |
| 18.9 | 19.7 | 19.7 | 19.9 | 19.3 | 19.6 | 1.3592 | 0.6919 | gij635031803 | dCTP pyrophosphatase 1                                                           |
| 19.4 | 19.9 | 19.3 | 19.3 | 19.3 | 19.7 | 0.7847 | 0.6926 | gij635064916 | 6-phosphofructokinase, muscle type isoform X4                                    |
| 16.3 | 16.4 | 15.3 | 15.9 | 16.5 | 16.1 | 1.4653 | 0.6931 | gij635020702 | serine/threonine-protein kinase 4 isoform X2                                     |
| 20.1 | 16.1 | 18.3 | 19.3 | 17.0 | 16.4 | 0.2472 | 0.6950 | gij635035126 | guanine nucleotide-binding protein subunit alpha-11                              |
| 21.5 | 21.5 | 21.1 | 21.2 | 21.3 | 21.4 | 0.8666 | 0.6950 | gij635114607 | replication protein A 14 kDa subunit                                             |
| 21.6 | 21.3 | 21.2 | 21.3 | 21.1 | 21.5 | 0.8491 | 0.6951 | gij635125273 | arginine--tRNA ligase, cytoplasmic                                               |
| 18.7 | 19.3 | 18.6 | 18.7 | 19.1 | 18.5 | 0.7758 | 0.6952 | gij635012005 | dipeptidyl peptidase 3                                                           |
| 19.0 | 20.7 | 18.3 | 18.8 | 19.4 | 18.9 | 0.4877 | 0.6967 | gij635083513 | DNA-directed RNA polymerases I, II, and III subunit RPABC3                       |
| 18.7 | 19.6 | 19.4 | 19.5 | 19.5 | 18.0 | 0.5827 | 0.6974 | gij635018350 | probable ATP-dependent RNA helicase DDX6                                         |
| 17.7 | 16.7 | 16.1 | 16.6 | 17.7 | 17.0 | 1.7436 | 0.6975 | gij635071536 | erythrocyte band 7 integral membrane protein                                     |
| 16.2 | 17.9 | 17.4 | 16.6 | 17.9 | 17.8 | 1.8780 | 0.6976 | gij635141412 | U2 small nuclear ribonucleoprotein A                                             |
| 18.5 | 19.1 | 18.3 | 18.3 | 18.7 | 18.6 | 0.7812 | 0.6978 | gij635100620 | crk-like protein                                                                 |
| 20.1 | 21.3 | 21.3 | 21.1 | 21.2 | 20.9 | 1.4922 | 0.6979 | gij635112983 | phosphoserine phosphatase                                                        |
| 19.7 | 20.0 | 19.3 | 19.4 | 19.8 | 19.6 | 0.7875 | 0.6980 | gij635013048 | DNA damage-binding protein 1                                                     |
| 19.5 | 19.7 | 20.1 | 20.7 | 19.7 | 19.4 | 1.4949 | 0.6983 | gij635090305 | serine/arginine-rich splicing factor 2                                           |
| 15.8 | 17.5 | 16.0 | 16.3 | 15.9 | 16.4 | 0.5847 | 0.6987 | gij635139710 | thyroid receptor-interacting protein 6 isoform X2                                |
| 24.2 | 24.3 | 23.9 | 23.7 | 24.5 | 23.9 | 0.7748 | 0.6995 | gij635066208 | nascent polypeptide-associated complex subunit alpha                             |
| 18.8 | 20.1 | 18.4 | 18.9 | 19.5 | 19.6 | 1.7170 | 0.7008 | gij635126999 | glucosamine 6-phosphate N-acetyltransferase                                      |

|      |      |      |      |      |      |        |        |              |                                                                               |
|------|------|------|------|------|------|--------|--------|--------------|-------------------------------------------------------------------------------|
| 23.4 | 23.7 | 23.2 | 23.5 | 23.4 | 23.6 | 1.1507 | 0.7009 | gi 635116144 | filamin-C isoform X2                                                          |
| 21.3 | 22.1 | 21.5 | 21.6 | 22.2 | 21.5 | 1.3640 | 0.7018 | gi 635141834 | proteasome subunit beta type-5 isoform X1                                     |
| 16.9 | 15.3 | 14.0 | 16.9 | 14.3 | 16.4 | 3.0421 | 0.7025 | gi 635079850 | dynactin subunit 1 isoform X11                                                |
| 18.5 | 19.7 | 19.7 | 19.6 | 18.7 | 19.0 | 0.6401 | 0.7035 | gi 635030720 | phosphomannomutase 2 isoform X1                                               |
| 18.9 | 18.8 | 18.4 | 18.6 | 19.2 | 18.8 | 1.2528 | 0.7035 | gi 635125648 | PDZ and LIM domain protein 7 isoform X4                                       |
| 20.5 | 20.4 | 19.6 | 19.7 | 20.7 | 20.7 | 1.5298 | 0.7043 | gi 635108339 | UMP-CMP kinase                                                                |
| 15.8 | 15.9 | 14.8 | 15.3 | 15.8 | 16.0 | 1.4685 | 0.7050 | gi 635055455 | MMS19 nucleotide excision repair protein homolog isoform X3                   |
| 20.0 | 21.7 | 20.6 | 19.8 | 21.4 | 20.1 | 0.5154 | 0.7054 | gi 635029119 | 40S ribosomal protein S23                                                     |
| 20.4 | 20.3 | 19.7 | 19.7 | 20.3 | 20.1 | 0.7730 | 0.7056 | gi 635098407 | mucosa-associated lymphoid tissue lymphoma translocation protein 1 isoform X2 |
| 17.9 | 17.6 | 17.0 | 17.0 | 17.6 | 18.4 | 1.5601 | 0.7057 | gi 635093624 | L-xylulose reductase                                                          |
| 19.3 | 19.9 | 18.7 | 19.0 | 20.0 | 19.4 | 1.5329 | 0.7057 | gi 635059570 | splicing factor 3B subunit 1 isoform X2                                       |
| 19.5 | 20.1 | 19.6 | 19.9 | 20.1 | 19.5 | 1.3000 | 0.7059 | gi 635015034 | ras-related protein R-Ras2                                                    |
| 20.7 | 21.4 | 20.3 | 20.0 | 20.7 | 21.1 | 0.6477 | 0.7068 | gi 635037175 | coatamer subunit epsilon                                                      |
| 24.2 | 24.8 | 24.6 | 24.5 | 25.1 | 24.4 | 1.3061 | 0.7074 | gi 635051073 | 60S ribosomal protein L8                                                      |
| 16.6 | 16.2 | 16.1 | 15.9 | 16.2 | 16.5 | 0.7835 | 0.7075 | gi 635100210 | proteasome assembly chaperone 2 isoform X2                                    |
| 15.4 | 16.1 | 14.7 | 15.0 | 15.6 | 15.1 | 0.6695 | 0.7098 | gi 635042400 | ubiquitin-like modifier-activating enzyme 6 isoform X2                        |
| 22.3 | 22.0 | 21.8 | 21.6 | 22.4 | 21.8 | 0.7723 | 0.7110 | gi 635021820 | dynein light chain roadblock-type 1                                           |
| 17.6 | 17.2 | 16.6 | 16.5 | 17.5 | 16.9 | 0.6981 | 0.7112 | gi 635147913 | deoxyribonuclease-1-like 1                                                    |
| 19.1 | 19.1 | 17.9 | 19.2 | 18.7 | 18.5 | 1.4952 | 0.7137 | gi 635113429 | drebrin-like protein isoform X3                                               |
| 20.1 | 20.6 | 20.6 | 20.4 | 20.7 | 20.5 | 1.1936 | 0.7141 | gi 635142821 | eukaryotic translation initiation factor 2 subunit 3                          |
| 25.6 | 25.8 | 25.7 | 25.6 | 25.7 | 25.9 | 1.1230 | 0.7143 | gi 635089952 | nucleoside diphosphate kinase A                                               |
| 23.7 | 24.4 | 23.7 | 23.6 | 24.1 | 24.5 | 1.3711 | 0.7143 | gi 635110740 | 60S ribosomal protein L11                                                     |
| 20.2 | 20.8 | 20.2 | 20.0 | 20.5 | 20.4 | 0.7963 | 0.7154 | gi 635087747 | phosphoribosylformylglycinamide synthase                                      |
| 16.3 | 18.3 | 17.2 | 16.7 | 18.5 | 17.6 | 2.0081 | 0.7160 | gi 635145159 | ribose-phosphate pyrophosphokinase 1                                          |
| 20.4 | 21.0 | 20.6 | 20.7 | 20.7 | 20.5 | 0.8696 | 0.7181 | gi 635056871 | glutaredoxin-3                                                                |
| 21.1 | 20.7 | 20.1 | 20.1 | 20.6 | 20.8 | 0.7262 | 0.7187 | gi 635036387 | peroxiredoxin-2                                                               |
| 21.3 | 21.1 | 20.6 | 20.8 | 21.2 | 21.2 | 1.2319 | 0.7192 | gi 635086640 | coatamer subunit beta                                                         |
| 24.0 | 24.3 | 23.9 | 23.9 | 24.1 | 24.3 | 1.1470 | 0.7199 | gi 635062909 | CD9 antigen                                                                   |
| 19.2 | 19.7 | 18.6 | 18.8 | 19.1 | 19.1 | 0.7388 | 0.7205 | gi 635123774 | core histone macro-H2A.1 isoform X4                                           |
| 20.0 | 20.7 | 20.3 | 20.6 | 20.5 | 20.2 | 1.2190 | 0.7211 | gi 635037700 | cytochrome b-c1 complex subunit Rieske, mitochondrial                         |
| 23.0 | 23.9 | 22.5 | 22.9 | 23.8 | 23.3 | 1.5612 | 0.7211 | gi 635116486 | myotrophin                                                                    |
| 22.1 | 22.6 | 21.6 | 22.0 | 22.2 | 21.8 | 0.7540 | 0.7213 | gi 635066098 | citrate synthase, mitochondrial isoform X2                                    |
| 17.6 | 18.3 | 16.7 | 17.0 | 18.1 | 18.2 | 1.7046 | 0.7216 | gi 635093572 | ethanolamine-phosphate cytidyltransferase isoform X3                          |
| 21.9 | 22.5 | 22.1 | 22.2 | 22.6 | 22.0 | 1.2402 | 0.7223 | gi 635143237 | ubiquitin-like modifier-activating enzyme 1 isoform X3                        |
| 18.6 | 17.4 | 16.5 | 17.2 | 17.5 | 18.7 | 1.9810 | 0.7224 | gi 635055114 | insulin-degrading enzyme isoform X3                                           |
| 15.8 | 16.7 | 15.2 | 13.9 | 16.5 | 16.2 | 0.4365 | 0.7229 | gi 635057139 | UDP-glucose:glycoprotein glucosyltransferase 1                                |
| 20.7 | 21.3 | 20.7 | 20.6 | 20.7 | 21.1 | 0.8057 | 0.7230 | gi 635115796 | F-actin-capping protein subunit alpha-2                                       |
| 21.2 | 22.2 | 20.9 | 21.8 | 21.8 | 21.2 | 1.4912 | 0.7231 | gi 635102550 | NHP2-like protein 1 isoform X2                                                |
| 20.2 | 20.0 | 19.7 | 19.8 | 20.4 | 20.1 | 1.2073 | 0.7233 | gi 635084904 | sodium/potassium-transporting ATPase subunit beta-3 isoform X3                |
| 23.8 | 24.0 | 23.4 | 23.5 | 24.2 | 23.9 | 1.3043 | 0.7251 | gi 635137880 | 60S ribosomal protein L9                                                      |
| 19.1 | 19.3 | 18.5 | 18.3 | 19.1 | 19.0 | 0.7478 | 0.7254 | gi 635098242 | apoptosis regulator Bcl-2                                                     |

|      |      |      |      |      |      |        |        |              |                                                                                          |
|------|------|------|------|------|------|--------|--------|--------------|------------------------------------------------------------------------------------------|
| 19.5 | 20.7 | 20.2 | 20.5 | 20.5 | 19.9 | 1.4401 | 0.7254 | gi 635130443 | 3(2),5-bisphosphate nucleotidase 1                                                       |
| 21.5 | 21.8 | 21.1 | 21.3 | 21.8 | 20.9 | 0.7480 | 0.7257 | gi 635024825 | heat shock protein 105 kDa isoform X2                                                    |
| 17.1 | 17.5 | 17.4 | 16.7 | 17.6 | 17.4 | 0.7748 | 0.7276 | gi 635126107 | magnesium-dependent phosphatase 1 isoform X5                                             |
| 24.2 | 23.8 | 23.8 | 24.2 | 24.0 | 23.3 | 0.7712 | 0.7278 | gi 635095836 | 40S ribosomal protein S18                                                                |
| 21.4 | 21.1 | 21.0 | 21.0 | 21.5 | 21.3 | 1.1666 | 0.7278 | gi 635037870 | programmed cell death protein 5 isoform X2                                               |
| 23.0 | 23.3 | 22.9 | 23.2 | 23.1 | 23.1 | 1.1231 | 0.7295 | gi 635109198 | adenylyl cyclase-associated protein 1 isoform X1                                         |
| 17.9 | 19.3 | 19.2 | 19.0 | 18.7 | 19.2 | 1.4991 | 0.7298 | gi 635118578 | cytochrome b-c1 complex subunit 1, mitochondrial                                         |
| 21.3 | 20.9 | 20.2 | 20.7 | 21.1 | 21.2 | 1.3698 | 0.7298 | gi 635106483 | glutamate--cysteine ligase regulatory subunit                                            |
| 25.3 | 25.5 | 24.8 | 25.1 | 25.4 | 25.4 | 1.2090 | 0.7307 | gi 635044581 | annexin A5                                                                               |
| 20.5 | 20.3 | 19.7 | 19.8 | 20.3 | 20.1 | 0.7810 | 0.7320 | gi 635080465 | exportin-1 isoform X1                                                                    |
| 23.7 | 25.0 | 24.2 | 24.4 | 24.6 | 24.3 | 1.3701 | 0.7335 | gi 635142241 | brain acid soluble protein 1                                                             |
| 19.4 | 20.3 | 19.6 | 19.5 | 20.1 | 19.9 | 1.2996 | 0.7341 | gi 635143387 | putative RNA-binding protein 3                                                           |
| 21.4 | 21.5 | 21.3 | 21.3 | 21.7 | 21.4 | 1.1241 | 0.7346 | gi 635057694 | aspartate--tRNA ligase, cytoplasmic                                                      |
| 23.8 | 24.2 | 23.6 | 23.7 | 23.9 | 23.8 | 0.8648 | 0.7354 | gi 635146477 | glucose-6-phosphate 1-dehydrogenase isoform X7                                           |
| 23.0 | 23.4 | 23.0 | 22.9 | 23.2 | 23.1 | 0.8744 | 0.7355 | gi 635039073 | flavin reductase (NADPH) isoform X1                                                      |
| 17.3 | 17.5 | 16.6 | 16.5 | 17.3 | 17.1 | 0.7496 | 0.7364 | gi 635037169 | regulator of nonsense transcripts 1 isoform X4                                           |
| 20.2 | 21.1 | 19.4 | 20.4 | 20.9 | 20.0 | 1.5753 | 0.7372 | gi 635035551 | far upstream element-binding protein 2 isoform X4                                        |
| 19.1 | 20.9 | 20.1 | 18.3 | 20.6 | 20.3 | 0.4856 | 0.7375 | gi 635050269 | protein NDRG1 isoform X5                                                                 |
| 19.6 | 20.4 | 20.1 | 20.0 | 20.7 | 19.9 | 1.3197 | 0.7377 | gi 635045006 | ATP-binding cassette sub-family E member 1                                               |
| 19.3 | 19.8 | 19.2 | 19.2 | 19.6 | 19.8 | 1.2491 | 0.7377 | gi 635113345 | 2-oxoglutarate dehydrogenase, mitochondrial isoform X3                                   |
| 21.4 | 21.9 | 21.3 | 21.2 | 21.5 | 21.7 | 0.8367 | 0.7381 | gi 635125810 | sequestosome-1 isoform X2                                                                |
| 18.6 | 18.9 | 17.6 | 18.5 | 18.8 | 18.4 | 1.4089 | 0.7388 | gi 635126282 | sec1 family domain-containing protein 1 isoform X1                                       |
| 18.3 | 19.0 | 17.8 | 17.3 | 18.5 | 18.6 | 0.6456 | 0.7402 | gi 635039808 | vasodilator-stimulated phosphoprotein isoform X3                                         |
| 20.1 | 20.2 | 20.2 | 19.9 | 20.3 | 20.4 | 1.1177 | 0.7412 | gi 635146559 | prefoldin subunit 3                                                                      |
| 21.0 | 21.5 | 21.1 | 21.4 | 21.2 | 21.3 | 1.1560 | 0.7420 | gi 635124121 | prefoldin subunit 1 isoform X4                                                           |
| 19.3 | 18.2 | 18.6 | 18.6 | 18.5 | 18.7 | 0.7758 | 0.7422 | gi 635088981 | bleomycin hydrolase isoform X2                                                           |
| 16.1 | 15.9 | 15.1 | 15.6 | 15.8 | 15.5 | 0.7820 | 0.7422 | gi 635063661 | probable ATP-dependent RNA helicase DDX47                                                |
| 20.9 | 20.9 | 20.4 | 20.5 | 20.8 | 20.8 | 0.8527 | 0.7436 | gi 635044138 | aminoacyl tRNA synthase complex-interacting multifunctional protein 1 isoform X2         |
| 19.8 | 19.6 | 18.2 | 19.7 | 19.8 | 18.7 | 1.6235 | 0.7437 | gi 635120681 | protein SEC13 homolog isoform X4                                                         |
| 21.5 | 22.3 | 21.9 | 22.0 | 22.1 | 21.8 | 1.2249 | 0.7439 | gi 635089744 | serine/arginine-rich splicing factor 1                                                   |
| 20.4 | 20.7 | 20.1 | 20.8 | 20.3 | 19.7 | 0.7441 | 0.7442 | gi 635126917 | thioredoxin-related transmembrane protein 1                                              |
| 21.5 | 22.2 | 21.6 | 21.6 | 22.0 | 21.8 | 1.2152 | 0.7447 | gi 635111000 | dolichyl-diphosphooligosaccharide--protein glycosyltransferase 48 kDa subunit isoform X2 |
| 23.8 | 24.2 | 23.7 | 23.6 | 24.1 | 24.2 | 1.1823 | 0.7454 | gi 635132557 | peroxiredoxin-6                                                                          |
| 14.4 | 15.1 | 14.7 | 14.2 | 15.4 | 15.0 | 1.3745 | 0.7461 | gi 635032485 | 2-oxoglutarate and iron-dependent oxygenase domain-containing protein 1 isoform X2       |
| 22.7 | 23.3 | 23.0 | 23.4 | 23.3 | 22.7 | 1.2466 | 0.7466 | gi 635123430 | histidine triad nucleotide-binding protein 1                                             |
| 14.2 | 15.6 | 12.4 | 13.0 | 15.1 | 15.4 | 2.6072 | 0.7466 | gi 635118439 | putative ATP-dependent RNA helicase DHX30 isoform X6                                     |
| 19.4 | 20.0 | 20.1 | 19.7 | 20.0 | 19.5 | 0.8102 | 0.7468 | gi 635137496 | eukaryotic translation initiation factor 3 subunit J                                     |
| 18.9 | 18.2 | 17.8 | 18.1 | 18.7 | 18.5 | 1.3123 | 0.7471 | gi 635027119 | pachytene checkpoint protein 2 homolog                                                   |
| 22.1 | 22.6 | 22.2 | 21.9 | 22.5 | 22.2 | 0.8226 | 0.7474 | gi 635118669 | inosine-5-monophosphate dehydrogenase 2 isoform X2                                       |
| 22.8 | 22.8 | 22.7 | 22.6 | 22.8 | 22.9 | 0.9294 | 0.7479 | gi 635068305 | endoplasmic reticulum resident protein 29 isoform X1                                     |
| 17.4 | 18.5 | 16.9 | 17.6 | 18.2 | 17.6 | 1.5079 | 0.7492 | gi 635070706 | serine/threonine-protein phosphatase 2A activator isoform X4                             |

|      |      |      |      |      |      |        |        |               |                                                                            |
|------|------|------|------|------|------|--------|--------|---------------|----------------------------------------------------------------------------|
| 22.8 | 24.0 | 23.2 | 23.2 | 23.2 | 23.2 | 0.7575 | 0.7492 | gij 635104668 | tropomyosin alpha-3 chain isoform X8                                       |
| 19.3 | 19.7 | 19.4 | 19.2 | 19.8 | 19.8 | 1.2026 | 0.7500 | gij 635066109 | protein canopy homolog 2                                                   |
| 22.2 | 21.9 | 21.9 | 21.8 | 22.1 | 22.3 | 1.1394 | 0.7513 | gij 635109089 | CTP synthase 1 isoform X2                                                  |
| 19.3 | 19.9 | 19.7 | 19.0 | 19.1 | 20.4 | 0.6832 | 0.7519 | gij 635051381 | tubulin alpha chain-like 3                                                 |
| 18.7 | 18.5 | 17.6 | 18.2 | 18.4 | 17.9 | 0.7521 | 0.7519 | gij 635120895 | 28S ribosomal protein S25, mitochondrial                                   |
| 16.2 | 17.5 | 16.8 | 17.3 | 17.3 | 16.4 | 1.4238 | 0.7522 | gij 635084821 | procollagen-lysine,2-oxoglutarate 5-dioxygenase 2 isoform X4               |
| 23.1 | 23.4 | 22.8 | 23.1 | 23.1 | 22.9 | 0.8648 | 0.7522 | gij 635096072 | heat shock 70 kDa protein 1A/1B                                            |
| 18.3 | 18.7 | 18.4 | 18.3 | 18.6 | 18.7 | 1.1345 | 0.7527 | gij 635017660 | radixin isoform X1                                                         |
| 18.5 | 19.2 | 17.9 | 17.9 | 19.2 | 19.1 | 1.5298 | 0.7536 | gij 635028565 | splicing regulatory glutamine/lysine-rich protein 1 isoform X8             |
| 23.8 | 24.9 | 24.2 | 24.1 | 24.6 | 23.8 | 0.7408 | 0.7543 | gij 635054210 | 40S ribosomal protein S15a                                                 |
| 16.0 | 16.3 | 15.9 | 15.4 | 16.5 | 16.0 | 0.7613 | 0.7544 | gij 635084840 | U2 snRNP-associated SURP motif-containing protein isoform X1               |
| 17.0 | 17.1 | 16.7 | 17.4 | 17.5 | 16.4 | 1.3528 | 0.7552 | gij 635080728 | spectrin beta chain, non-erythrocytic 1 isoform X3                         |
| 23.5 | 23.9 | 23.8 | 23.5 | 23.9 | 23.7 | 0.8848 | 0.7565 | gij 635112884 | 6-phosphogluconate dehydrogenase, decarboxylating                          |
| 17.5 | 17.2 | 17.9 | 16.2 | 17.4 | 18.3 | 0.6104 | 0.7566 | gij 635055963 | cytosolic purine 5-nucleotidase isoform X4                                 |
| 15.3 | 15.9 | 14.1 | 14.6 | 15.8 | 15.6 | 1.6521 | 0.7574 | gij 635036365 | transportin-2 isoform X4                                                   |
| 25.1 | 25.1 | 24.8 | 24.7 | 25.1 | 25.5 | 1.2172 | 0.7581 | gij 635108638 | 40S ribosomal protein S8 isoform X1                                        |
| 18.0 | 18.2 | 17.1 | 17.4 | 18.2 | 18.1 | 1.3731 | 0.7586 | gij 635093778 | tubulin-specific chaperone D isoform X2                                    |
| 19.9 | 20.0 | 19.3 | 19.5 | 19.9 | 19.6 | 0.8309 | 0.7611 | gij 635052538 | kinesin-1 heavy chain                                                      |
| 19.4 | 20.9 | 19.4 | 20.0 | 20.5 | 19.8 | 1.5134 | 0.7617 | gij 635107125 | far upstream element-binding protein 1 isoform X9                          |
| 18.1 | 20.2 | 19.3 | 19.6 | 20.1 | 18.7 | 1.7149 | 0.7621 | gij 635014049 | apoptosis inhibitor 5                                                      |
| 23.2 | 23.6 | 23.1 | 23.1 | 23.4 | 23.3 | 0.8819 | 0.7623 | gij 635092337 | ras-related protein Rab-5C isoform X2                                      |
| 23.5 | 24.6 | 24.5 | 24.2 | 24.3 | 24.4 | 1.3066 | 0.7627 | gij 635095598 | 60S ribosomal protein L10a                                                 |
| 17.8 | 18.4 | 18.3 | 17.9 | 18.1 | 18.2 | 0.8591 | 0.7632 | gij 635142725 | ribosomal protein S6 kinase alpha-3 isoform X6                             |
| 17.5 | 19.6 | 19.5 | 19.1 | 19.5 | 18.7 | 1.7099 | 0.7636 | gij 635145627 | glypican-4                                                                 |
| 15.4 | 16.2 | 14.9 | 15.0 | 15.7 | 16.3 | 1.4930 | 0.7640 | gij 635019735 | opioid growth factor receptor isoform X2                                   |
| 21.8 | 23.0 | 22.4 | 22.5 | 22.5 | 21.7 | 0.7161 | 0.7648 | gij 635083081 | low molecular weight phosphotyrosine protein phosphatase isoform X6        |
| 20.1 | 19.6 | 19.3 | 19.3 | 19.9 | 20.1 | 1.2671 | 0.7655 | gij 635023948 | pituitary tumor-transforming gene 1 protein-interacting protein isoform X5 |
| 19.7 | 20.2 | 19.4 | 19.7 | 20.0 | 19.8 | 1.1806 | 0.7664 | gij 635127102 | kinectin isoform X8                                                        |
| 22.7 | 23.6 | 22.9 | 23.1 | 23.3 | 23.0 | 1.2369 | 0.7665 | gij 635051361 | aldo-keto reductase family 1 member C3-like                                |
| 17.0 | 15.8 | 15.8 | 16.0 | 16.6 | 16.4 | 1.3581 | 0.7679 | gij 635092308 | signal transducer and activator of transcription 3 isoform X10             |
| 22.1 | 23.2 | 22.5 | 22.6 | 22.1 | 22.6 | 0.7728 | 0.7680 | gij 635110337 | nuclear migration protein nudC isoform X2                                  |
| 21.3 | 22.1 | 21.4 | 21.7 | 21.7 | 21.6 | 1.2141 | 0.7708 | gij 635083372 | dnaJ homolog subfamily B member 11                                         |
| 19.4 | 19.4 | 19.5 | 19.1 | 19.8 | 19.6 | 1.1701 | 0.7709 | gij 635121177 | DNA replication licensing factor MCM2 isoform X2                           |
| 24.5 | 25.1 | 24.5 | 24.5 | 25.0 | 24.8 | 1.1882 | 0.7717 | gij 635066200 | ATP synthase subunit beta, mitochondrial                                   |
| 20.8 | 21.3 | 20.0 | 20.5 | 21.1 | 20.1 | 0.7234 | 0.7731 | gij 635035797 | ELAV-like protein 1                                                        |
| 20.5 | 20.5 | 20.0 | 20.0 | 20.6 | 20.8 | 1.2154 | 0.7734 | gij 635140562 | uncharacterized protein LOC103246949                                       |
| 22.0 | 22.6 | 22.1 | 22.0 | 22.6 | 21.9 | 0.8219 | 0.7743 | gij 635137858 | ubiquitin-conjugating enzyme E2 K isoform X2                               |
| 19.8 | 19.6 | 20.1 | 19.9 | 19.7 | 20.1 | 1.1305 | 0.7757 | gij 635143125 | farnesyl pyrophosphate synthase-like                                       |
| 18.4 | 18.2 | 18.0 | 17.7 | 18.6 | 18.7 | 1.2643 | 0.7777 | gij 635142763 | spermine synthase isoform X2                                               |
| 21.5 | 22.2 | 21.6 | 21.8 | 22.0 | 21.7 | 1.1553 | 0.7782 | gij 635053952 | vinculin isoform X2                                                        |
| 20.7 | 20.2 | 20.5 | 20.6 | 20.3 | 20.4 | 0.8924 | 0.7784 | gij 635071982 | guanine nucleotide-binding protein G(I)/G(S)/G(O) subunit gamma-10         |

|      |      |      |      |      |      |        |        |              |                                                                                                                  |
|------|------|------|------|------|------|--------|--------|--------------|------------------------------------------------------------------------------------------------------------------|
| 20.2 | 20.6 | 20.1 | 20.3 | 20.4 | 20.3 | 1.1157 | 0.7794 | gi 635091100 | 26S proteasome non-ATPase regulatory subunit 12 isoform X1                                                       |
| 21.4 | 21.6 | 20.6 | 20.7 | 21.5 | 21.0 | 0.7743 | 0.7798 | gi 635130328 | calpain-2 catalytic subunit isoform X3                                                                           |
| 18.9 | 18.9 | 18.7 | 18.6 | 18.9 | 19.1 | 1.1132 | 0.7821 | gi 635140454 | Golgi to ER traffic protein 4 homolog isoform X2                                                                 |
| 22.0 | 22.4 | 21.6 | 21.9 | 22.2 | 21.7 | 0.8295 | 0.7821 | gi 635124529 | dihydropyrimidinase-related protein 3 isoform X1                                                                 |
| 15.9 | 16.1 | 14.8 | 15.5 | 16.2 | 15.4 | 1.3844 | 0.7822 | gi 635048008 | DNA-dependent protein kinase catalytic subunit isoform X2                                                        |
| 24.0 | 24.2 | 23.5 | 23.6 | 24.1 | 24.0 | 1.1865 | 0.7833 | gi 635104925 | protein S100-A10 isoform X2                                                                                      |
| 19.3 | 19.3 | 19.0 | 19.0 | 19.5 | 19.4 | 1.1432 | 0.7837 | gi 635021516 | minor histocompatibility antigen H13 isoform X2                                                                  |
| 21.2 | 22.1 | 21.7 | 22.0 | 21.4 | 21.3 | 0.8011 | 0.7840 | gi 635100204 | tubulin beta-6 chain                                                                                             |
| 16.2 | 17.3 | 16.3 | 16.1 | 17.2 | 16.8 | 1.3854 | 0.7847 | gi 635072952 | dynactin subunit 3 isoform X3                                                                                    |
| 19.0 | 19.2 | 18.9 | 18.9 | 19.1 | 19.2 | 1.0795 | 0.7862 | gi 635081861 | CAD protein                                                                                                      |
| 22.2 | 21.5 | 21.8 | 22.9 | 21.1 | 21.9 | 1.4599 | 0.7871 | gi 635104692 | 40S ribosomal protein S27                                                                                        |
| 25.9 | 25.9 | 25.5 | 25.5 | 26.2 | 25.9 | 1.1851 | 0.7874 | gi 635049432 | 14-3-3 protein zeta/delta                                                                                        |
| 18.0 | 17.9 | 17.1 | 17.6 | 17.9 | 17.9 | 1.2194 | 0.7874 | gi 635095005 | serine/threonine-protein phosphatase 2A 56 kDa regulatory subunit delta isoform                                  |
| 17.7 | 18.3 | 17.2 | 17.5 | 18.3 | 17.9 | 1.3043 | 0.7877 | gi 635062184 | protein phosphatase 1 regulatory subunit 7 isoform X5                                                            |
| 22.6 | 23.6 | 22.6 | 22.6 | 23.1 | 22.6 | 0.7840 | 0.7878 | gi 635132429 | calcyclin-binding protein isoform X2                                                                             |
| 17.3 | 16.2 | 16.4 | 16.6 | 16.5 | 17.1 | 1.2856 | 0.7880 | gi 635057745 | kynureninase isoform X2                                                                                          |
| 22.2 | 22.3 | 22.0 | 21.8 | 22.8 | 22.2 | 1.2203 | 0.7887 | gi 635134098 | proteasome subunit alpha type-4 isoform X2                                                                       |
| 21.9 | 22.1 | 21.5 | 21.5 | 22.3 | 21.9 | 1.1878 | 0.7890 | gi 635082041 | ras-related protein Rab-10                                                                                       |
| 18.2 | 18.8 | 17.8 | 17.8 | 18.0 | 18.7 | 0.7659 | 0.7892 | gi 635012758 | atlastin-3 isoform X2                                                                                            |
| 16.2 | 16.2 | 15.6 | 15.6 | 16.4 | 16.2 | 1.2217 | 0.7894 | gi 635093391 | E3 ubiquitin-protein ligase RNF213 isoform X2                                                                    |
| 19.2 | 19.9 | 18.4 | 19.0 | 19.0 | 19.1 | 0.7492 | 0.7904 | gi 635083533 | eukaryotic translation initiation factor 4 gamma 1 isoform X5                                                    |
| 25.3 | 26.0 | 25.0 | 25.6 | 25.4 | 25.5 | 1.2048 | 0.7904 | gi 635140804 | 60S ribosomal protein L7a                                                                                        |
| 21.6 | 23.1 | 22.2 | 22.6 | 22.2 | 22.4 | 1.3411 | 0.7914 | gi 635080331 | actin-related protein 2                                                                                          |
| 24.7 | 25.1 | 24.7 | 24.3 | 24.7 | 25.9 | 1.3825 | 0.7919 | gi 635057886 | L-lactate dehydrogenase A chain                                                                                  |
| 15.9 | 17.6 | 16.6 | 15.6 | 17.7 | 16.1 | 0.5844 | 0.7925 | gi 635123556 | kinesin-like protein KIF3A isoform X10                                                                           |
| 19.5 | 18.9 | 18.0 | 18.7 | 19.3 | 18.7 | 1.3828 | 0.7927 | gi 635067985 | coronin-1C isoform X3                                                                                            |
| 17.6 | 18.1 | 17.0 | 17.5 | 17.7 | 17.2 | 0.8033 | 0.7936 | gi 635026894 | cullin-4A isoform X2                                                                                             |
| 18.6 | 19.9 | 19.7 | 19.2 | 19.3 | 20.1 | 1.3607 | 0.7936 | gi 635128132 | dihydrolipoyllysine-residue succinyltransferase component of 2-oxoglutarate dehydrogenase complex, mitochondrial |
| 19.2 | 19.5 | 19.1 | 19.2 | 19.7 | 18.7 | 0.8246 | 0.7940 | gi 635061054 | phenylalanine--tRNA ligase beta subunit                                                                          |
| 18.7 | 19.4 | 18.2 | 19.6 | 18.9 | 18.2 | 1.3897 | 0.7940 | gi 635088412 | fatty aldehyde dehydrogenase isoform X4                                                                          |
| 21.9 | 21.9 | 20.8 | 21.5 | 21.8 | 21.6 | 1.2655 | 0.7942 | gi 635060458 | bifunctional purine biosynthesis protein PURH isoform X1                                                         |
| 20.9 | 21.4 | 21.1 | 20.9 | 21.2 | 21.2 | 0.8932 | 0.7949 | gi 635079545 | S-adenosylmethionine synthase isoform type-2                                                                     |
| 22.1 | 21.8 | 21.6 | 21.8 | 21.9 | 21.6 | 0.8982 | 0.7958 | gi 635049324 | ribonuclease UK114                                                                                               |
| 27.8 | 28.0 | 27.6 | 27.8 | 28.0 | 27.7 | 1.1133 | 0.7959 | gi 635093488 | actin, cytoplasmic 2                                                                                             |
| 21.8 | 21.9 | 21.3 | 21.4 | 21.7 | 21.7 | 0.8718 | 0.7963 | gi 635083535 | 26S proteasome non-ATPase regulatory subunit 2                                                                   |
| 19.7 | 20.0 | 18.7 | 19.2 | 19.6 | 20.0 | 1.3251 | 0.7964 | gi 635042196 | transcription intermediary factor 1-beta isoform X2                                                              |
| 20.1 | 20.6 | 20.3 | 20.2 | 20.9 | 20.1 | 1.1964 | 0.7967 | gi 635047011 | zinc transporter ZIP14 isoform X2                                                                                |
| 21.3 | 22.5 | 22.2 | 21.5 | 22.0 | 22.2 | 0.7682 | 0.7972 | gi 635034824 | cold-inducible RNA-binding protein isoform X2                                                                    |
| 17.5 | 18.4 | 16.5 | 17.3 | 17.7 | 17.0 | 0.6855 | 0.7972 | gi 635147230 | splicing factor 3B subunit 4                                                                                     |
| 19.1 | 19.6 | 18.5 | 18.7 | 19.7 | 19.2 | 1.3188 | 0.7989 | gi 635043347 | enolase-phosphatase E1 isoform X2                                                                                |
| 17.3 | 17.4 | 17.0 | 16.7 | 17.9 | 17.4 | 1.2482 | 0.7997 | gi 635050639 | gasdermin-D isoform X3                                                                                           |

|      |      |      |      |      |      |        |        |              |                                                                 |
|------|------|------|------|------|------|--------|--------|--------------|-----------------------------------------------------------------|
| 24.7 | 24.6 | 23.3 | 24.5 | 24.3 | 24.1 | 1.3433 | 0.8008 | gi 635074755 | prothymosin alpha                                               |
| 22.1 | 22.5 | 22.2 | 22.1 | 22.7 | 22.3 | 1.1461 | 0.8025 | gi 635049421 | polyadenylate-binding protein 1                                 |
| 17.4 | 17.8 | 17.2 | 17.1 | 17.7 | 17.5 | 0.8579 | 0.8032 | gi 635086793 | unconventional myosin-Ic                                        |
| 18.1 | 18.0 | 17.7 | 17.9 | 18.2 | 17.9 | 1.0954 | 0.8055 | gi 635103668 | nicastrin isoform X2                                            |
| 17.2 | 19.0 | 18.8 | 17.3 | 19.6 | 18.7 | 1.7004 | 0.8059 | gi 635122674 | 1,4-alpha-glucan-branching enzyme                               |
| 22.1 | 22.2 | 21.7 | 21.9 | 22.1 | 22.0 | 1.1115 | 0.8059 | gi 635012585 | peroxiredoxin-5, mitochondrial isoform X1                       |
| 19.5 | 19.8 | 19.5 | 19.5 | 19.8 | 19.7 | 1.0954 | 0.8061 | gi 635146912 | glycogen phosphorylase, brain form isoform X4                   |
| 18.7 | 18.7 | 16.3 | 17.7 | 18.9 | 17.9 | 1.6917 | 0.8078 | gi 635025875 | paraspeckle component 1                                         |
| 17.9 | 18.3 | 17.4 | 17.3 | 18.0 | 18.1 | 0.8072 | 0.8080 | gi 635059413 | glutaminase kidney isoform, mitochondrial isoform X2            |
| 19.2 | 17.7 | 17.9 | 18.0 | 18.3 | 18.2 | 0.7503 | 0.8083 | gi 635066592 | exportin-T isoform X2                                           |
| 18.9 | 18.9 | 18.6 | 19.3 | 18.1 | 18.7 | 0.8157 | 0.8085 | gi 635046021 | caspase-3                                                       |
| 22.8 | 23.7 | 22.7 | 22.7 | 23.1 | 23.2 | 0.8058 | 0.8096 | gi 635081686 | serine/threonine-protein phosphatase PP1-beta catalytic subunit |
| 25.2 | 25.5 | 25.3 | 25.4 | 25.4 | 25.2 | 1.0674 | 0.8098 | gi 635093546 | protein disulfide-isomerase isoform X1                          |
| 19.7 | 20.3 | 19.5 | 19.9 | 20.0 | 19.9 | 1.1624 | 0.8098 | gi 635077828 | dynein light chain Tctex-type 1 isoform X2                      |
| 21.1 | 21.0 | 20.9 | 20.7 | 21.2 | 21.3 | 1.1145 | 0.8106 | gi 635134123 | isocitrate dehydrogenase [NAD] subunit alpha, mitochondrial     |
| 17.2 | 18.4 | 18.0 | 18.7 | 17.5 | 16.8 | 0.6742 | 0.8109 | gi 635039348 | platelet-activating factor acetylhydrolase IB subunit gamma     |
| 20.7 | 20.1 | 20.9 | 20.8 | 19.7 | 20.8 | 0.7713 | 0.8113 | gi 635103716 | astrocytic phosphoprotein PEA-15                                |
| 24.7 | 25.4 | 24.5 | 24.5 | 25.2 | 24.7 | 0.8203 | 0.8130 | gi 635066023 | myosin light polypeptide 6                                      |
| 20.2 | 20.5 | 19.8 | 20.0 | 20.0 | 20.3 | 0.8826 | 0.8132 | gi 635141789 | protein arginine N-methyltransferase 5 isoform X3               |
| 19.6 | 19.8 | 18.8 | 18.8 | 19.9 | 19.2 | 0.7792 | 0.8137 | gi 635077553 | UPF0364 protein C6orf211 homolog                                |
| 14.7 | 15.6 | 12.5 | 12.9 | 15.8 | 13.1 | 0.4663 | 0.8139 | gi 635112820 | splicing factor 3A subunit 3                                    |
| 22.5 | 22.3 | 22.1 | 22.2 | 22.3 | 22.6 | 1.1082 | 0.8141 | gi 635148115 | ADP/ATP translocase 3                                           |
| 20.4 | 20.3 | 19.6 | 20.0 | 20.2 | 20.2 | 1.1650 | 0.8152 | gi 635142324 | ras-related protein Rab-9A                                      |
| 20.2 | 20.2 | 19.5 | 19.3 | 20.7 | 20.3 | 1.3050 | 0.8175 | gi 635115839 | LSM8 homolog, U6 small nuclear RNA associated                   |
| 19.8 | 21.5 | 18.1 | 20.1 | 20.3 | 19.8 | 1.7535 | 0.8176 | gi 635111706 | TAR DNA-binding protein 43                                      |
| 20.9 | 21.0 | 20.9 | 20.4 | 21.6 | 21.0 | 1.2211 | 0.8194 | gi 635132761 | sodium/potassium-transporting ATPase subunit beta-1             |
| 20.9 | 21.3 | 21.0 | 21.1 | 21.1 | 21.1 | 1.0647 | 0.8195 | gi 635103664 | coatomer subunit alpha isoform X2                               |
| 19.6 | 19.9 | 19.3 | 19.4 | 19.6 | 19.6 | 0.8979 | 0.8195 | gi 635076626 | ethylmalonyl-CoA decarboxylase isoform X4                       |
| 24.1 | 25.0 | 24.1 | 24.1 | 24.6 | 24.3 | 0.8332 | 0.8203 | gi 635089946 | nucleoside diphosphate kinase B isoform X1                      |
| 22.7 | 23.1 | 22.5 | 23.0 | 22.4 | 22.8 | 0.8645 | 0.8205 | gi 635016456 | serpin H1 isoform X2                                            |
| 18.1 | 18.5 | 17.3 | 17.4 | 18.4 | 18.5 | 1.3183 | 0.8210 | gi 635135860 | COP9 signalosome complex subunit 2 isoform X2                   |
| 20.4 | 21.8 | 21.0 | 21.0 | 21.4 | 21.1 | 1.2625 | 0.8215 | gi 635105192 | RNA-binding protein 8A isoform X2                               |
| 25.8 | 26.1 | 25.2 | 26.0 | 25.9 | 25.4 | 1.2020 | 0.8216 | gi 635128768 | calmodulin                                                      |
| 18.1 | 18.6 | 17.7 | 18.0 | 18.5 | 18.2 | 1.1767 | 0.8217 | gi 635133894 | isoleucine--tRNA ligase, mitochondrial                          |
| 18.3 | 19.7 | 18.5 | 18.6 | 19.4 | 18.8 | 1.3170 | 0.8218 | gi 635135250 | sorting nexin-1 isoform X4                                      |
| 19.2 | 20.1 | 20.1 | 18.9 | 20.4 | 19.8 | 0.7518 | 0.8219 | gi 635024954 | serine/threonine-protein kinase DCLK1 isoform X9                |
| 18.8 | 18.3 | 18.0 | 18.5 | 18.3 | 18.5 | 1.1438 | 0.8231 | gi 635112764 | serine--tRNA ligase, cytoplasmic                                |
| 22.9 | 23.3 | 23.0 | 22.8 | 23.2 | 23.3 | 1.1165 | 0.8232 | gi 635112985 | T-complex protein 1 subunit zeta                                |
| 27.1 | 27.0 | 26.7 | 26.8 | 27.1 | 26.9 | 1.0776 | 0.8234 | gi 635096313 | tubulin beta chain                                              |
| 19.8 | 19.9 | 19.5 | 19.9 | 20.0 | 19.4 | 1.1225 | 0.8245 | gi 635043079 | general vesicular transport factor p115 isoform X4              |
| 23.3 | 23.7 | 23.3 | 23.4 | 23.7 | 23.3 | 1.1086 | 0.8250 | gi 635102544 | X-ray repair cross-complementing protein 6                      |



|      |      |      |      |      |      |        |        |              |                                                                         |
|------|------|------|------|------|------|--------|--------|--------------|-------------------------------------------------------------------------|
| 23.0 | 24.0 | 23.2 | 23.6 | 23.3 | 23.1 | 0.8372 | 0.8258 | gi 635020678 | 14-3-3 protein beta/alpha                                               |
| 18.6 | 19.1 | 18.4 | 18.6 | 19.1 | 18.6 | 1.1475 | 0.8267 | gi 635055159 | myoferlin                                                               |
| 19.2 | 21.7 | 21.3 | 20.8 | 20.9 | 21.1 | 1.5142 | 0.8270 | gi 635109853 | eukaryotic translation initiation factor 3 subunit I                    |
| 22.3 | 22.9 | 21.2 | 21.1 | 22.5 | 22.3 | 0.6976 | 0.8271 | gi 635083409 | transformer-2 protein homolog beta isoform X2                           |
| 20.1 | 20.1 | 19.7 | 19.6 | 20.0 | 20.1 | 0.8931 | 0.8272 | gi 635140582 | eukaryotic translation initiation factor 3 subunit B                    |
| 19.0 | 18.2 | 17.7 | 18.1 | 18.4 | 18.1 | 0.8124 | 0.8278 | gi 635091067 | importin subunit alpha-1                                                |
| 17.2 | 17.8 | 16.8 | 16.1 | 17.7 | 17.6 | 0.7281 | 0.8286 | gi 635106512 | protein Dr1                                                             |
| 22.5 | 23.2 | 21.2 | 22.4 | 22.9 | 22.0 | 1.4109 | 0.8287 | gi 635034731 | polypyrimidine tract-binding protein 1 isoform X4                       |
| 19.1 | 18.9 | 17.9 | 17.9 | 19.0 | 18.6 | 0.7721 | 0.8292 | gi 635011139 | toll-interacting protein                                                |
| 24.3 | 25.3 | 24.5 | 24.6 | 24.8 | 24.5 | 0.8559 | 0.8293 | gi 635036434 | calreticulin                                                            |
| 24.6 | 25.3 | 24.8 | 24.5 | 25.1 | 24.9 | 0.8606 | 0.8305 | gi 635087440 | eukaryotic translation initiation factor 5A-1 isoform X2                |
| 22.2 | 22.7 | 22.3 | 22.4 | 22.5 | 22.3 | 0.9143 | 0.8306 | gi 635051288 | 6-phosphofructokinase type C                                            |
| 19.5 | 19.2 | 18.2 | 18.5 | 19.5 | 19.1 | 1.2865 | 0.8312 | gi 635014034 | estradiol 17-beta-dehydrogenase 12                                      |
| 19.6 | 19.3 | 18.5 | 18.7 | 19.4 | 19.6 | 1.2336 | 0.8313 | gi 635135073 | very-long-chain (3R)-3-hydroxyacyl-[acyl-carrier protein] dehydratase 3 |
| 17.6 | 20.7 | 18.6 | 18.0 | 20.4 | 19.4 | 1.8257 | 0.8315 | gi 635131321 | small nuclear ribonucleoprotein E isoform X2                            |
| 11.1 | 11.5 | 11.0 | 10.6 | 11.7 | 11.6 | 1.2227 | 0.8315 | gi 635112818 | microtubule-actin cross-linking factor 1                                |
| 17.7 | 17.7 | 17.9 | 16.8 | 18.5 | 18.3 | 1.3217 | 0.8324 | gi 635078401 | U5 small nuclear ribonucleoprotein 200 kDa helicase                     |
| 16.7 | 18.0 | 16.3 | 16.4 | 17.6 | 17.4 | 1.3749 | 0.8324 | gi 635073810 | GTP:AMP phosphotransferase AK3, mitochondrial isoform X4                |
| 20.9 | 21.7 | 20.2 | 20.8 | 21.6 | 20.8 | 1.3072 | 0.8325 | gi 635125721 | heterogeneous nuclear ribonucleoprotein A/B-like                        |
| 19.9 | 20.5 | 20.4 | 20.1 | 20.6 | 20.2 | 1.1354 | 0.8330 | gi 635126974 | ERO1-like protein alpha isoform X2                                      |
| 21.0 | 22.1 | 21.1 | 21.2 | 21.5 | 21.1 | 0.8208 | 0.8331 | gi 635033916 | lysine--tRNA ligase isoform X2                                          |
| 19.9 | 21.9 | 21.5 | 20.9 | 20.6 | 21.4 | 0.7165 | 0.8339 | gi 635125502 | clathrin light chain B                                                  |
| 21.2 | 21.5 | 21.1 | 21.2 | 21.5 | 21.2 | 1.0790 | 0.8341 | gi 635032154 | vacuolar protein sorting-associated protein 35 isoform X2               |
| 20.5 | 20.9 | 20.2 | 20.2 | 20.7 | 20.6 | 0.8742 | 0.8342 | gi 635137969 | phosphoglucomutase-2                                                    |
| 19.5 | 19.5 | 19.1 | 19.3 | 19.6 | 19.1 | 0.9027 | 0.8352 | gi 635099726 | ubiquitin carboxyl-terminal hydrolase 14 isoform X2                     |
| 18.9 | 19.1 | 18.3 | 18.1 | 19.1 | 18.9 | 0.8204 | 0.8354 | gi 635107325 | serine/arginine-rich splicing factor 11 isoform X4                      |
| 23.2 | 23.7 | 22.5 | 23.1 | 23.3 | 22.7 | 0.8139 | 0.8359 | gi 635058930 | heterogeneous nuclear ribonucleoprotein A3                              |
| 23.0 | 23.2 | 22.7 | 23.2 | 23.1 | 22.7 | 1.1055 | 0.8364 | gi 635108941 | nuclease-sensitive element-binding protein 1 isoform X1                 |
| 27.1 | 27.4 | 27.0 | 27.1 | 27.0 | 27.3 | 0.9259 | 0.8376 | gi 635135402 | annexin A2                                                              |
| 17.4 | 17.4 | 16.1 | 16.4 | 17.8 | 17.2 | 1.3503 | 0.8379 | gi 635103407 | UDP-N-acetylhexosamine pyrophosphorylase isoform X5                     |
| 18.5 | 18.3 | 18.3 | 18.2 | 18.6 | 18.4 | 1.0766 | 0.8383 | gi 635094615 | CD2-associated protein isoform X2                                       |
| 20.2 | 19.8 | 19.5 | 19.9 | 19.4 | 20.0 | 0.8714 | 0.8384 | gi 635141713 | FACT complex subunit SPT16                                              |
| 16.1 | 16.2 | 15.1 | 15.4 | 16.4 | 15.9 | 1.2539 | 0.8393 | gi 635029477 | leucyl-cystinyl aminopeptidase                                          |
| 17.5 | 17.7 | 17.3 | 17.3 | 17.8 | 17.5 | 1.1008 | 0.8397 | gi 635088250 | developmentally-regulated GTP-binding protein 2                         |
| 22.2 | 22.3 | 22.1 | 22.1 | 22.4 | 22.0 | 0.9291 | 0.8404 | gi 635057282 | translin isoform X1                                                     |
| 22.2 | 22.5 | 22.2 | 22.1 | 22.8 | 22.2 | 1.1203 | 0.8416 | gi 635015756 | 26S proteasome non-ATPase regulatory subunit 13                         |
| 20.3 | 22.9 | 22.1 | 22.0 | 22.2 | 21.5 | 1.4826 | 0.8420 | gi 635105025 | proteasome subunit beta type-4                                          |
| 23.7 | 24.2 | 23.7 | 23.6 | 24.0 | 23.8 | 0.9067 | 0.8433 | gi 635067296 | ubiquitin-conjugating enzyme E2 N                                       |
| 20.9 | 21.4 | 20.4 | 20.5 | 21.3 | 21.1 | 1.2018 | 0.8435 | gi 635055905 | alpha-centractin                                                        |
| 23.5 | 24.1 | 23.7 | 23.7 | 23.9 | 23.6 | 0.9160 | 0.8441 | gi 635012908 | elongation factor 1-gamma                                               |
| 18.7 | 18.6 | 18.4 | 18.3 | 18.6 | 18.6 | 0.9396 | 0.8443 | gi 635011864 | serine/threonine-protein phosphatase PP1-alpha catalytic subunit        |

|      |      |      |      |      |      |        |        |              |                                                                                     |
|------|------|------|------|------|------|--------|--------|--------------|-------------------------------------------------------------------------------------|
| 21.3 | 22.6 | 21.9 | 21.4 | 22.0 | 22.0 | 0.8144 | 0.8444 | gi 635036188 | glucosidase 2 subunit beta isoform X2                                               |
| 21.6 | 21.7 | 20.6 | 21.3 | 21.2 | 21.3 | 0.8446 | 0.8458 | gi 635018094 | platelet-activating factor acetylhydrolase IB subunit beta isoform X2               |
| 25.8 | 25.7 | 25.2 | 25.4 | 25.6 | 25.5 | 0.9196 | 0.8460 | gi 635011771 | glutathione S-transferase P isoform X2                                              |
| 21.8 | 22.4 | 22.0 | 22.4 | 21.9 | 22.1 | 1.1150 | 0.8469 | gi 635039836 | small nuclear ribonucleoprotein Sm D2                                               |
| 24.6 | 25.7 | 23.8 | 24.8 | 25.5 | 24.3 | 1.3609 | 0.8475 | gi 635065817 | heterogeneous nuclear ribonucleoprotein A1 isoform X2                               |
| 17.0 | 17.9 | 18.3 | 17.2 | 18.1 | 18.1 | 1.2543 | 0.8481 | gi 635081066 | protein phosphatase 1B isoform X5                                                   |
| 16.1 | 16.6 | 15.8 | 16.0 | 16.3 | 16.3 | 1.1216 | 0.8481 | gi 635035597 | cdc42-interacting protein 4 isoform X4                                              |
| 19.3 | 20.9 | 20.1 | 19.5 | 20.3 | 20.3 | 0.7837 | 0.8484 | gi 635029829 | SUMO-conjugating enzyme UBC9                                                        |
| 19.7 | 20.0 | 19.8 | 20.1 | 19.8 | 19.4 | 0.9018 | 0.8486 | gi 635134356 | cytochrome c oxidase subunit 5A, mitochondrial                                      |
| 20.7 | 21.2 | 19.5 | 20.2 | 20.8 | 20.0 | 0.7634 | 0.8490 | gi 635026919 | lysosome-associated membrane glycoprotein 1                                         |
| 22.3 | 22.7 | 22.8 | 22.7 | 22.3 | 22.9 | 1.1053 | 0.8500 | gi 635105349 | D-3-phosphoglycerate dehydrogenase                                                  |
| 23.1 | 23.6 | 23.0 | 23.1 | 23.4 | 23.3 | 1.1084 | 0.8507 | gi 635121096 | ras-related protein Rab-7a                                                          |
| 23.6 | 23.7 | 23.3 | 23.5 | 23.6 | 23.5 | 0.9481 | 0.8509 | gi 635112732 | putative protein FAM10A4                                                            |
| 21.7 | 22.6 | 22.1 | 22.2 | 22.3 | 21.7 | 0.8615 | 0.8513 | gi 635012770 | reticulon-3 isoform X5                                                              |
| 22.9 | 23.4 | 23.0 | 23.6 | 22.8 | 22.7 | 0.8592 | 0.8514 | gi 635020930 | 60S ribosomal protein L6                                                            |
| 19.8 | 19.7 | 19.0 | 19.5 | 19.6 | 19.5 | 1.1312 | 0.8518 | gi 635083421 | insulin-like growth factor 2 mRNA-binding protein 2 isoform X6                      |
| 21.1 | 21.3 | 20.7 | 20.7 | 21.2 | 21.0 | 0.8982 | 0.8520 | gi 635022798 | trifunctional purine biosynthetic protein adenosine-3                               |
| 21.0 | 21.7 | 21.3 | 21.5 | 21.4 | 21.0 | 0.8837 | 0.8521 | gi 635092643 | 26S proteasome non-ATPase regulatory subunit 3                                      |
| 21.3 | 20.8 | 20.1 | 20.4 | 20.7 | 21.3 | 1.2154 | 0.8528 | gi 635065098 | tubulin alpha-1C chain                                                              |
| 21.1 | 21.3 | 20.8 | 20.8 | 21.4 | 21.1 | 1.1118 | 0.8531 | gi 635015028 | coatamer subunit beta                                                               |
| 20.8 | 21.1 | 20.6 | 20.5 | 21.2 | 20.6 | 0.8894 | 0.8537 | gi 635038773 | 26S proteasome non-ATPase regulatory subunit 8                                      |
| 21.2 | 21.5 | 20.9 | 21.1 | 21.5 | 21.2 | 1.0985 | 0.8543 | gi 635040342 | U1 small nuclear ribonucleoprotein 70 kDa isoform X2                                |
| 17.8 | 18.0 | 17.0 | 17.4 | 17.9 | 17.7 | 1.1710 | 0.8543 | gi 635068638 | translational activator GCN1                                                        |
| 11.5 | 16.1 | 12.4 | 12.5 | 16.0 | 12.7 | 2.2738 | 0.8544 | gi 635029168 | ras GTPase-activating protein 1 isoform X2                                          |
| 21.2 | 21.4 | 21.0 | 20.9 | 21.4 | 21.3 | 1.0914 | 0.8548 | gi 635118489 | microtubule-associated protein 4 isoform X16                                        |
| 15.5 | 16.6 | 16.1 | 15.8 | 15.9 | 16.8 | 1.2202 | 0.8551 | gi 635084253 | structural maintenance of chromosomes protein 4 isoform X2                          |
| 21.5 | 22.0 | 21.1 | 21.4 | 21.5 | 21.5 | 0.8798 | 0.8555 | gi 635102245 | probable ATP-dependent RNA helicase DDX17 isoform X2                                |
| 19.2 | 19.5 | 18.7 | 19.3 | 19.3 | 18.7 | 0.8747 | 0.8560 | gi 635031255 | cytochrome b-c1 complex subunit 2, mitochondrial                                    |
| 20.6 | 21.5 | 21.6 | 21.4 | 21.5 | 20.9 | 1.1809 | 0.8566 | gi 635031953 | RNA-binding protein FUS isoform X2                                                  |
| 23.0 | 24.1 | 23.2 | 22.6 | 24.0 | 23.3 | 0.7861 | 0.8581 | gi 635041590 | 60S ribosomal protein L28                                                           |
| 21.6 | 22.6 | 22.1 | 22.5 | 21.9 | 21.8 | 0.8490 | 0.8583 | gi 635098498 | thioredoxin-like protein 1 isoform X2                                               |
| 12.2 | 14.6 | 14.2 | 12.9 | 14.3 | 14.2 | 1.4653 | 0.8584 | gi 635104237 | ras GTPase-activating-like protein IQGAP3 isoform X3                                |
| 19.2 | 20.0 | 18.3 | 18.9 | 19.3 | 19.1 | 0.8030 | 0.8584 | gi 635093642 | COP9 signalosome complex subunit 1 isoform X9                                       |
| 22.1 | 22.6 | 21.6 | 22.0 | 22.4 | 22.0 | 1.1455 | 0.8619 | gi 635132088 | ATP-dependent RNA helicase A isoform X1                                             |
| 21.2 | 21.0 | 20.7 | 20.5 | 21.6 | 21.1 | 1.1688 | 0.8626 | gi 635139994 | 28 kDa heat- and acid-stable phosphoprotein                                         |
| 16.3 | 19.3 | 18.2 | 18.1 | 18.0 | 18.2 | 1.4567 | 0.8634 | gi 635077026 | tyrosine-protein kinase Fyn isoform X3                                              |
| 23.2 | 23.7 | 23.0 | 23.1 | 23.4 | 23.3 | 0.9131 | 0.8639 | gi 635054352 | inorganic pyrophosphatase                                                           |
| 17.4 | 17.7 | 17.0 | 16.7 | 17.8 | 17.6 | 0.8465 | 0.8640 | gi 635132243 | torsin-1A-interacting protein 2                                                     |
| 20.9 | 22.1 | 21.2 | 20.7 | 21.6 | 21.6 | 0.8192 | 0.8646 | gi 635093341 | eukaryotic initiation factor 4A-III                                                 |
| 22.7 | 23.0 | 22.5 | 22.3 | 22.8 | 23.0 | 0.9036 | 0.8649 | gi 635021048 | dolichyl-diphosphooligosaccharide--protein glycosyltransferase subunit 2 isoform X3 |
| 19.9 | 20.2 | 19.5 | 19.4 | 20.2 | 19.8 | 0.8800 | 0.8652 | gi 635091808 | 116 kDa U5 small nuclear ribonucleoprotein component                                |

|      |      |      |      |      |      |        |        |              |                                                                                   |
|------|------|------|------|------|------|--------|--------|--------------|-----------------------------------------------------------------------------------|
| 15.7 | 15.1 | 15.5 | 14.5 | 15.6 | 16.4 | 1.2771 | 0.8652 | gi 635066796 | rab-3A-interacting protein isoform X5                                             |
| 23.8 | 23.7 | 23.0 | 23.2 | 23.8 | 23.7 | 1.1363 | 0.8659 | gi 635066204 | prostaglandin E synthase 3 isoform X2                                             |
| 25.5 | 25.5 | 25.2 | 25.2 | 25.5 | 25.5 | 0.9514 | 0.8665 | gi 635082618 | protein disulfide-isomerase A6 isoform X2                                         |
| 21.9 | 20.2 | 20.0 | 20.4 | 20.3 | 21.7 | 1.3636 | 0.8666 | gi 635139078 | ATP synthase subunit e, mitochondrial                                             |
| 17.8 | 17.6 | 16.4 | 17.0 | 17.5 | 17.6 | 1.2259 | 0.8667 | gi 635057257 | myc box-dependent-interacting protein 1 isoform X16                               |
| 17.0 | 18.6 | 17.6 | 17.1 | 17.8 | 18.6 | 1.3006 | 0.8682 | gi 635091346 | coiled-coil domain-containing protein 47 isoform X4                               |
| 22.5 | 23.1 | 22.5 | 22.5 | 22.8 | 22.8 | 1.0935 | 0.8691 | gi 635113900 | glycine--tRNA ligase                                                              |
| 15.8 | 15.2 | 15.0 | 15.2 | 16.2 | 14.9 | 1.2025 | 0.8695 | gi 635127171 | exocyst complex component 5 isoform X1                                            |
| 18.8 | 18.8 | 18.0 | 18.4 | 18.6 | 18.8 | 1.1179 | 0.8696 | gi 635076689 | HD domain-containing protein 2                                                    |
| 20.0 | 20.4 | 19.6 | 19.5 | 20.1 | 20.3 | 0.8758 | 0.8702 | gi 635112077 | cytosolic acyl coenzyme A thioester hydrolase isoform X5                          |
| 22.0 | 23.0 | 21.0 | 21.9 | 22.8 | 21.0 | 0.7355 | 0.8713 | gi 635109561 | splicing factor, proline- and glutamine-rich isoform X2                           |
| 17.0 | 18.5 | 18.0 | 17.7 | 17.9 | 17.9 | 0.8377 | 0.8715 | gi 635061841 | leucine-rich repeat flightless-interacting protein 1 isoform X22                  |
| 19.6 | 21.5 | 20.8 | 20.4 | 21.2 | 20.5 | 1.2557 | 0.8723 | gi 635054561 | heterogeneous nuclear ribonucleoprotein H3 isoform X4                             |
| 24.1 | 25.0 | 24.4 | 24.2 | 24.8 | 24.6 | 1.1352 | 0.8724 | gi 635093554 | rho GDP-dissociation inhibitor 1 isoform X2                                       |
| 16.4 | 18.0 | 17.5 | 16.6 | 17.2 | 17.8 | 0.7961 | 0.8730 | gi 635139608 | procollagen-lysine,2-oxoglutarate 5-dioxygenase 3 isoform X1                      |
| 18.7 | 18.9 | 18.6 | 18.4 | 19.1 | 18.7 | 0.9160 | 0.8738 | gi 635070805 | spectrin alpha chain, non-erythrocytic 1 isoform X5                               |
| 19.2 | 18.9 | 18.5 | 18.2 | 19.3 | 18.9 | 0.8638 | 0.8744 | gi 635113023 | lanC-like protein 2 isoform X2                                                    |
| 18.6 | 19.2 | 18.8 | 18.2 | 19.0 | 19.5 | 1.1643 | 0.8750 | gi 635054084 | serine/threonine-protein phosphatase 2B catalytic subunit beta isoform isoform X5 |
| 25.0 | 24.9 | 24.8 | 24.6 | 25.0 | 25.2 | 0.9352 | 0.8752 | gi 635059587 | 10 kDa heat shock protein, mitochondrial isoform X4                               |
| 14.0 | 13.8 | 13.5 | 13.5 | 14.0 | 13.9 | 1.0917 | 0.8764 | gi 635111139 | E3 ubiquitin-protein ligase UBR4 isoform X8                                       |
| 23.5 | 23.7 | 23.0 | 23.2 | 23.6 | 23.4 | 1.0985 | 0.8768 | gi 635095703 | 40S ribosomal protein S10                                                         |
| 18.0 | 18.5 | 17.4 | 18.1 | 18.3 | 17.8 | 1.1431 | 0.8769 | gi 635087799 | myosin-10 isoform X9                                                              |
| 15.9 | 16.3 | 15.9 | 15.5 | 16.6 | 16.2 | 1.1388 | 0.8769 | gi 635056632 | short/branched chain specific acyl-CoA dehydrogenase, mitochondrial               |
| 26.5 | 27.2 | 27.1 | 26.9 | 27.0 | 26.7 | 0.9081 | 0.8769 | gi 635051897 | vimentin                                                                          |
| 20.8 | 21.6 | 21.0 | 21.0 | 21.4 | 21.0 | 1.1173 | 0.8774 | gi 635015439 | eukaryotic translation initiation factor 3 subunit F                              |
| 26.3 | 27.0 | 26.9 | 26.7 | 26.8 | 26.8 | 1.0882 | 0.8776 | gi 635083879 | thioredoxin                                                                       |
| 16.8 | 16.2 | 15.9 | 15.8 | 16.4 | 16.8 | 1.1538 | 0.8781 | gi 635048998 | copine-3                                                                          |
| 20.5 | 20.6 | 19.8 | 20.2 | 20.2 | 20.3 | 0.9129 | 0.8789 | gi 635098014 | cytosolic non-specific dipeptidase                                                |
| 17.0 | 16.8 | 16.5 | 16.5 | 17.0 | 16.8 | 0.9302 | 0.8792 | gi 635126095 | importin-4                                                                        |
| 21.1 | 21.0 | 20.5 | 20.9 | 21.1 | 20.6 | 0.9141 | 0.8795 | gi 67082898  | ATPase6                                                                           |
| 16.5 | 16.5 | 16.0 | 16.1 | 16.4 | 16.7 | 1.0871 | 0.8798 | gi 635104338 | 28S ribosomal protein S29, mitochondrial isoform X5                               |
| 19.0 | 17.2 | 18.4 | 18.4 | 18.2 | 18.3 | 1.2236 | 0.8809 | gi 635036781 | ras-related protein Rab-8A                                                        |
| 18.7 | 19.8 | 18.3 | 19.1 | 19.3 | 18.7 | 1.1847 | 0.8816 | gi 635091642 | integrin beta-3 isoform X2                                                        |
| 23.8 | 24.6 | 24.8 | 24.0 | 24.7 | 24.6 | 1.1429 | 0.8831 | gi 635015383 | 60S ribosomal protein L27a                                                        |
| 21.0 | 20.9 | 20.4 | 20.6 | 20.8 | 20.8 | 0.9317 | 0.8832 | gi 635119802 | pyruvate dehydrogenase E1 component subunit beta, mitochondrial                   |
| 20.0 | 19.8 | 18.9 | 19.2 | 20.1 | 19.1 | 0.8402 | 0.8834 | gi 635123897 | heterogeneous nuclear ribonucleoprotein A0                                        |
| 17.5 | 18.7 | 17.3 | 17.0 | 18.4 | 18.4 | 1.2630 | 0.8840 | gi 635081909 | microtubule-associated protein RP/EB family member 3 isoform X2                   |
| 15.9 | 14.8 | 14.9 | 15.0 | 15.2 | 15.6 | 1.1491 | 0.8846 | gi 635086860 | clustered mitochondria protein homolog isoform X5                                 |
| 20.4 | 21.5 | 20.2 | 20.7 | 21.5 | 20.2 | 1.2179 | 0.8852 | gi 635138151 | putative pre-mRNA-splicing factor ATP-dependent RNA helicase DHX15                |
| 23.9 | 24.3 | 23.9 | 23.8 | 24.2 | 24.1 | 1.0697 | 0.8857 | gi 635089580 | clathrin heavy chain 1 isoform X2                                                 |
| 14.4 | 15.3 | 14.8 | 14.9 | 15.7 | 14.2 | 1.1905 | 0.8858 | gi 635067276 | early endosome antigen 1                                                          |

|      |      |      |      |      |      |        |        |              |                                                                          |
|------|------|------|------|------|------|--------|--------|--------------|--------------------------------------------------------------------------|
| 17.4 | 19.8 | 18.1 | 19.1 | 18.2 | 18.3 | 1.3227 | 0.8858 | gi 635037967 | SUMO-activating enzyme subunit 2 isoform X2                              |
| 18.2 | 18.5 | 17.8 | 18.1 | 18.2 | 18.3 | 1.0840 | 0.8866 | gi 635100241 | nucleoporin SEH1 isoform X3                                              |
| 17.4 | 18.0 | 16.6 | 18.0 | 17.5 | 16.3 | 0.7954 | 0.8870 | gi 635054055 | protein transport protein Sec24C isoform X3                              |
| 25.3 | 25.4 | 24.6 | 24.8 | 25.3 | 25.4 | 1.1082 | 0.8884 | gi 635068640 | 60S acidic ribosomal protein P0                                          |
| 24.9 | 24.8 | 24.5 | 24.6 | 24.8 | 24.7 | 0.9577 | 0.8902 | gi 635131967 | peptidyl-prolyl cis-trans isomerase B                                    |
| 23.0 | 24.0 | 23.3 | 23.2 | 23.5 | 23.4 | 0.9084 | 0.8911 | gi 635019794 | proteasome subunit alpha type-7                                          |
| 20.4 | 20.3 | 18.8 | 19.7 | 20.1 | 19.9 | 1.1907 | 0.8915 | gi 635066751 | cleavage and polyadenylation specificity factor subunit 6 isoform X4     |
| 17.3 | 18.7 | 14.7 | 15.6 | 18.6 | 15.9 | 0.6096 | 0.8935 | gi 635123572 | septin-8 isoform X7                                                      |
| 22.5 | 23.9 | 23.5 | 23.2 | 23.2 | 23.3 | 0.8745 | 0.8936 | gi 635024322 | 60S ribosomal protein L29-like, partial                                  |
| 21.6 | 22.3 | 21.5 | 22.0 | 22.0 | 21.6 | 1.1005 | 0.8942 | gi 635137664 | transcription factor BTF3                                                |
| 15.8 | 15.0 | 14.5 | 14.6 | 16.1 | 14.4 | 0.8081 | 0.8946 | gi 635028233 | superkiller viralicidic activity 2-like 2                                |
| 21.8 | 22.2 | 21.6 | 21.5 | 22.0 | 22.0 | 0.9283 | 0.8958 | gi 635015295 | importin-7 isoform X2                                                    |
| 18.7 | 19.6 | 19.3 | 19.3 | 19.3 | 19.0 | 0.9081 | 0.8967 | gi 635049713 | eukaryotic translation initiation factor 3 subunit E isoform X1          |
| 19.2 | 19.1 | 18.6 | 18.7 | 19.2 | 19.0 | 1.0796 | 0.8973 | gi 635094501 | DNA replication licensing factor MCM3 isoform X1                         |
| 21.3 | 22.8 | 22.2 | 21.9 | 22.3 | 22.0 | 0.8691 | 0.8975 | gi 635051535 | ATP synthase subunit gamma, mitochondrial isoform X2                     |
| 22.9 | 22.5 | 21.8 | 22.3 | 22.5 | 22.5 | 1.1012 | 0.8975 | gi 635146311 | translocon-associated protein subunit delta                              |
| 23.4 | 24.7 | 24.1 | 24.0 | 24.2 | 24.3 | 1.1242 | 0.8982 | gi 635039265 | 40S ribosomal protein S19                                                |
| 19.4 | 19.3 | 18.5 | 18.9 | 19.5 | 19.0 | 1.1115 | 0.8987 | gi 635045872 | signal peptidase complex subunit 3                                       |
| 21.3 | 22.1 | 21.8 | 21.9 | 21.7 | 21.6 | 0.9252 | 0.8987 | gi 635125595 | vesicular integral-membrane protein VIP36                                |
| 19.5 | 20.1 | 19.4 | 19.6 | 19.7 | 19.7 | 0.9365 | 0.8987 | gi 635120073 | succinyl-CoA ligase [GDP-forming] subunit beta, mitochondrial isoform X1 |
| 19.2 | 21.2 | 19.4 | 20.2 | 20.4 | 19.0 | 0.7884 | 0.8992 | gi 635146664 | non-POU domain-containing octamer-binding protein                        |
| 18.8 | 18.8 | 18.3 | 18.1 | 18.3 | 19.7 | 1.1800 | 0.9001 | gi 635070587 | argininosuccinate synthase isoform X2                                    |
| 22.9 | 24.4 | 24.6 | 23.0 | 24.7 | 24.4 | 1.2428 | 0.9019 | gi 635096864 | histone H3.1-like                                                        |
| 20.7 | 20.9 | 19.9 | 20.2 | 20.8 | 20.7 | 1.1142 | 0.9031 | gi 635023804 | pyridoxal kinase isoform X2                                              |
| 23.3 | 23.8 | 23.3 | 23.3 | 23.6 | 23.4 | 0.9445 | 0.9054 | gi 635027385 | T-complex protein 1 subunit epsilon isoform X1                           |
| 16.1 | 16.2 | 15.8 | 14.8 | 17.0 | 16.1 | 0.8269 | 0.9056 | gi 635080131 | nucleolysin TIA-1 isoform p40 isoform X3                                 |
| 26.4 | 26.6 | 26.0 | 26.0 | 26.7 | 26.2 | 0.9287 | 0.9056 | gi 635080675 | ubiquitin-40S ribosomal protein S27a                                     |
| 21.2 | 21.3 | 20.6 | 20.6 | 21.3 | 21.3 | 1.1015 | 0.9063 | gi 635124018 | matrin-3 isoform X2                                                      |
| 19.5 | 20.2 | 18.9 | 19.4 | 19.7 | 19.3 | 0.8906 | 0.9067 | gi 635071961 | polypyrimidine tract-binding protein 3 isoform X12                       |
| 21.5 | 21.6 | 20.9 | 20.7 | 21.7 | 21.5 | 0.8973 | 0.9085 | gi 635074604 | serine palmitoyltransferase 1                                            |
| 19.2 | 19.1 | 18.9 | 18.8 | 19.4 | 19.1 | 1.0648 | 0.9087 | gi 635102037 | eukaryotic translation initiation factor 3 subunit D                     |
| 19.5 | 19.0 | 19.0 | 19.1 | 19.5 | 18.9 | 0.9310 | 0.9092 | gi 635144515 | SH3 domain-binding glutamic acid-rich-like protein                       |
| 16.3 | 16.9 | 16.0 | 16.2 | 17.1 | 15.8 | 0.8813 | 0.9101 | gi 635026577 | KDEL motif-containing protein 1 isoform X4                               |
| 17.7 | 18.3 | 17.2 | 17.3 | 18.1 | 17.9 | 1.1193 | 0.9102 | gi 635072000 | proteasome-associated protein ECM29 homolog isoform X2                   |
| 21.3 | 21.9 | 21.0 | 21.1 | 21.5 | 21.4 | 0.9222 | 0.9103 | gi 635035577 | tubulin beta-4A chain                                                    |
| 23.6 | 23.8 | 22.8 | 23.8 | 23.1 | 23.4 | 1.1079 | 0.9105 | gi 635128370 | activator of 90 kDa heat shock protein ATPase homolog 1                  |
| 22.8 | 23.6 | 22.9 | 22.4 | 23.3 | 23.5 | 0.8898 | 0.9107 | gi 635012126 | barrier-to-autointegration factor                                        |
| 18.3 | 19.5 | 18.8 | 19.3 | 18.2 | 19.0 | 0.8737 | 0.9107 | gi 332268712 | MHC class IA antigen                                                     |
| 17.6 | 17.1 | 16.2 | 16.3 | 17.2 | 17.7 | 1.1682 | 0.9113 | gi 635018414 | porphobilinogen deaminase isoform X2                                     |
| 20.9 | 22.0 | 21.2 | 21.3 | 21.9 | 21.0 | 1.1172 | 0.9121 | gi 635108082 | protein mago nashi homolog                                               |
| 22.6 | 22.7 | 22.2 | 22.3 | 22.6 | 22.4 | 0.9504 | 0.9121 | gi 635092873 | puromycin-sensitive aminopeptidase isoform X1                            |

|      |      |      |      |      |      |        |        |              |                                                                        |
|------|------|------|------|------|------|--------|--------|--------------|------------------------------------------------------------------------|
| 14.4 | 14.8 | 13.9 | 13.6 | 15.0 | 14.2 | 0.8786 | 0.9131 | gi 635031106 | UPF0505 protein C16orf62 homolog isoform X2                            |
| 19.8 | 19.5 | 18.2 | 20.1 | 20.0 | 17.7 | 1.2789 | 0.9140 | gi 635095493 | serine/arginine-rich splicing factor 3                                 |
| 22.3 | 22.8 | 22.4 | 22.4 | 22.7 | 22.4 | 0.9538 | 0.9149 | gi 635127756 | alpha-actinin-1 isoform X2                                             |
| 20.0 | 20.0 | 19.5 | 19.5 | 19.9 | 20.1 | 1.0678 | 0.9163 | gi 635043189 | septin-11 isoform X4                                                   |
| 17.9 | 16.4 | 18.9 | 19.0 | 17.1 | 17.4 | 1.2746 | 0.9165 | gi 635050135 | protein FAM49B isoform X1                                              |
| 19.7 | 20.1 | 18.9 | 19.0 | 20.0 | 19.8 | 1.1243 | 0.9174 | gi 635012486 | splicing factor 1 isoform X9                                           |
| 21.7 | 21.5 | 21.8 | 21.9 | 21.6 | 21.5 | 1.0330 | 0.9191 | gi 635022786 | ATP synthase subunit O, mitochondrial                                  |
| 17.0 | 17.6 | 16.5 | 16.5 | 17.5 | 17.0 | 0.8965 | 0.9201 | gi 635067235 | plasma membrane calcium-transporting ATPase 1 isoform X3               |
| 21.2 | 22.2 | 21.6 | 21.4 | 22.0 | 21.7 | 1.0851 | 0.9202 | gi 635012887 | neutral alpha-glucosidase AB                                           |
| 24.0 | 24.3 | 23.6 | 23.6 | 24.3 | 23.9 | 0.9360 | 0.9223 | gi 635087218 | complement component 1 Q subcomponent-binding protein, mitochondrial   |
| 16.0 | 16.0 | 15.3 | 15.5 | 16.0 | 16.0 | 1.0704 | 0.9224 | gi 635061311 | E3 ubiquitin-protein ligase TRIP12 isoform X9                          |
| 18.7 | 18.7 | 17.9 | 18.2 | 18.6 | 18.6 | 1.0719 | 0.9227 | gi 635137527 | OClA domain-containing protein 2 isoform X1                            |
| 18.9 | 19.1 | 17.6 | 17.9 | 19.2 | 18.7 | 1.1549 | 0.9230 | gi 635133178 | translin-associated protein X                                          |
| 14.6 | 15.1 | 13.8 | 14.7 | 16.0 | 12.5 | 0.7749 | 0.9240 | gi 635018987 | signal recognition particle receptor subunit alpha isoform X2          |
| 18.2 | 18.1 | 17.4 | 17.2 | 18.2 | 18.4 | 1.1078 | 0.9249 | gi 635102724 | tubulin--tyrosine ligase-like protein 12 isoform X2                    |
| 15.9 | 16.2 | 15.3 | 15.0 | 16.4 | 15.9 | 0.8950 | 0.9264 | gi 635100081 | serine/threonine-protein phosphatase 4 regulatory subunit 1 isoform X4 |
| 17.7 | 18.7 | 17.9 | 16.9 | 18.8 | 18.8 | 1.1699 | 0.9264 | gi 635133277 | mitochondrial import receptor subunit TOM20 homolog isoform X2         |
| 20.0 | 20.3 | 18.2 | 19.4 | 19.7 | 19.6 | 1.1614 | 0.9265 | gi 635043422 | COP9 signalosome complex subunit 4 isoform X2                          |
| 21.0 | 21.6 | 21.2 | 21.2 | 21.3 | 21.3 | 1.0409 | 0.9268 | gi 635126983 | 26S protease regulatory subunit 10B                                    |
| 19.8 | 19.5 | 19.0 | 18.7 | 19.7 | 19.8 | 0.9144 | 0.9283 | gi 635066866 | ras-related protein Rab-21                                             |
| 18.0 | 17.5 | 17.1 | 17.6 | 19.1 | 15.6 | 0.7933 | 0.9285 | gi 635020988 | protein-glutamine gamma-glutamyltransferase 2                          |
| 16.2 | 17.3 | 16.7 | 16.2 | 17.2 | 16.6 | 0.9118 | 0.9286 | gi 635111146 | delta-1-pyrroline-5-carboxylate dehydrogenase, mitochondrial           |
| 23.7 | 24.6 | 24.1 | 24.2 | 24.3 | 23.9 | 1.0666 | 0.9290 | gi 635106546 | 60S ribosomal protein L5 isoform X2                                    |
| 16.0 | 16.0 | 16.0 | 15.9 | 16.0 | 16.1 | 1.0162 | 0.9295 | gi 635040128 | DNA ligase 1 isoform X3                                                |
| 22.1 | 22.6 | 21.6 | 22.0 | 22.5 | 21.9 | 1.0781 | 0.9300 | gi 635104748 | interleukin enhancer-binding factor 2 isoform X3                       |
| 18.0 | 16.4 | 15.0 | 17.4 | 17.7 | 14.7 | 1.3128 | 0.9302 | gi 635123206 | peroxisomal multifunctional enzyme type 2                              |
| 18.0 | 18.3 | 17.4 | 17.5 | 18.3 | 17.9 | 0.9272 | 0.9305 | gi 635111721 | DNA fragmentation factor subunit alpha                                 |
| 19.0 | 19.4 | 18.3 | 18.1 | 18.9 | 19.6 | 0.8928 | 0.9310 | gi 635107403 | plasminogen activator inhibitor 1 RNA-binding protein isoform X4       |
| 19.8 | 20.2 | 19.6 | 20.1 | 19.8 | 19.8 | 1.0465 | 0.9313 | gi 635123916 | eukaryotic peptide chain release factor subunit 1                      |
| 22.3 | 22.8 | 22.0 | 22.2 | 22.3 | 22.5 | 0.9468 | 0.9316 | gi 635020322 | exportin-2                                                             |
| 18.7 | 18.6 | 18.3 | 18.3 | 18.8 | 18.6 | 1.0415 | 0.9323 | gi 635125953 | alpha-amino adipic semialdehyde dehydrogenase                          |
| 20.5 | 20.9 | 20.2 | 20.4 | 20.6 | 20.6 | 1.0437 | 0.9323 | gi 635130447 | bifunctional glutamate/proline--tRNA ligase isoform X2                 |
| 20.5 | 21.2 | 19.5 | 19.8 | 20.6 | 20.6 | 0.8892 | 0.9326 | gi 635012628 | peptidyl-prolyl cis-trans isomerase FKBP2 isoform X4                   |
| 23.7 | 23.9 | 22.7 | 23.5 | 23.6 | 23.2 | 1.0869 | 0.9332 | gi 635141695 | heterogeneous nuclear ribonucleoproteins C1/C2 isoform X3              |
| 18.5 | 17.7 | 17.7 | 17.8 | 18.1 | 18.1 | 1.0622 | 0.9339 | gi 635114655 | asparagine synthetase [glutamine-hydrolyzing] isoform X2               |
| 21.3 | 21.5 | 20.6 | 21.0 | 21.2 | 21.3 | 1.0583 | 0.9340 | gi 635013637 | 26S protease regulatory subunit 6A isoform X2                          |
| 17.6 | 18.8 | 14.4 | 17.5 | 18.3 | 15.4 | 1.3673 | 0.9343 | gi 635054934 | bifunctional 3-phosphoadenosine 5-phosphosulfate synthase 2 isoform X3 |
| 17.0 | 16.8 | 15.7 | 15.8 | 17.3 | 16.6 | 1.1258 | 0.9345 | gi 635123500 | prolyl 4-hydroxylase subunit alpha-2 isoform X4                        |
| 21.1 | 22.2 | 21.8 | 21.7 | 22.1 | 21.4 | 1.0795 | 0.9346 | gi 635115394 | 26S protease regulatory subunit 7                                      |
| 23.7 | 23.5 | 23.2 | 23.3 | 23.5 | 23.6 | 0.9677 | 0.9358 | gi 635065704 | poly(rC)-binding protein 2 isoform X19                                 |
| 23.4 | 23.9 | 22.6 | 23.1 | 23.9 | 23.0 | 1.0992 | 0.9360 | gi 635114128 | heterogeneous nuclear ribonucleoproteins A2/B1 isoform X3              |

|      |      |      |      |      |      |        |        |              |                                                                             |
|------|------|------|------|------|------|--------|--------|--------------|-----------------------------------------------------------------------------|
| 21.7 | 22.0 | 21.3 | 21.6 | 22.0 | 21.5 | 1.0499 | 0.9360 | gi 635066667 | cullin-associated NEDD8-dissociated protein 1                               |
| 19.7 | 20.6 | 20.1 | 20.2 | 20.3 | 19.8 | 0.9454 | 0.9369 | gi 635096078 | valine--tRNA ligase isoform X2                                              |
| 18.6 | 19.5 | 18.4 | 18.3 | 19.4 | 18.6 | 0.9099 | 0.9369 | gi 635126823 | ADP-ribosylation factor 6                                                   |
| 17.1 | 17.3 | 16.2 | 17.4 | 16.2 | 16.8 | 0.9068 | 0.9369 | gi 635106332 | RNA 3-terminal phosphate cyclase isoform X2                                 |
| 17.3 | 17.7 | 16.8 | 17.0 | 17.4 | 17.3 | 1.0551 | 0.9373 | gi 635115063 | multidrug resistance protein 1 isoform X3                                   |
| 23.2 | 23.2 | 22.6 | 22.8 | 23.3 | 22.9 | 1.0500 | 0.9383 | gi 635138493 | WD repeat-containing protein 1                                              |
| 16.7 | 17.4 | 16.4 | 16.5 | 17.0 | 17.1 | 1.0683 | 0.9387 | gi 635101928 | target of Myb protein 1 isoform X5                                          |
| 18.7 | 18.9 | 17.8 | 18.1 | 18.8 | 18.5 | 1.0780 | 0.9389 | gi 635016015 | ribonucleoside-diphosphate reductase large subunit isoform X1               |
| 15.9 | 17.6 | 16.7 | 16.8 | 17.3 | 16.2 | 1.1136 | 0.9395 | gi 635092256 | tubulin gamma-1 chain                                                       |
| 17.5 | 18.2 | 17.4 | 17.7 | 17.1 | 18.1 | 0.9312 | 0.9397 | gi 635122361 | mitochondrial import receptor subunit TOM70                                 |
| 23.3 | 22.8 | 23.1 | 22.9 | 23.1 | 23.2 | 1.0317 | 0.9403 | gi 635077865 | T-complex protein 1 subunit alpha                                           |
| 22.3 | 22.4 | 21.8 | 22.3 | 22.1 | 22.3 | 1.0348 | 0.9411 | gi 635076960 | myristoylated alanine-rich C-kinase substrate isoform X1                    |
| 20.3 | 20.5 | 19.9 | 20.3 | 20.3 | 20.1 | 1.0338 | 0.9422 | gi 635111115 | aflatoxin B1 aldehyde reductase member 2 isoform X1                         |
| 20.4 | 20.9 | 19.1 | 20.2 | 20.8 | 19.5 | 1.1191 | 0.9424 | gi 635037600 | heterogeneous nuclear ribonucleoprotein M                                   |
| 21.1 | 21.1 | 20.5 | 21.0 | 21.1 | 20.5 | 0.9520 | 0.9434 | gi 635074614 | isoleucine--tRNA ligase, cytoplasmic                                        |
| 27.6 | 27.5 | 27.2 | 27.5 | 27.6 | 27.3 | 1.0278 | 0.9438 | gi 635062941 | glyceraldehyde-3-phosphate dehydrogenase                                    |
| 17.5 | 19.2 | 18.4 | 17.9 | 19.1 | 18.3 | 1.1048 | 0.9440 | gi 635123905 | catenin alpha-1 isoform X2                                                  |
| 19.6 | 20.6 | 19.9 | 19.8 | 20.5 | 19.9 | 1.0601 | 0.9441 | gi 635080227 | glutamine--fructose-6-phosphate aminotransferase [isomerizing] 1 isoform X3 |
| 22.0 | 22.5 | 22.2 | 22.3 | 22.2 | 22.2 | 0.9772 | 0.9465 | gi 635101816 | 14-3-3 protein eta isoform X2                                               |
| 20.6 | 21.1 | 20.3 | 20.2 | 21.1 | 20.7 | 0.9423 | 0.9471 | gi 635123658 | S-phase kinase-associated protein 1                                         |
| 19.1 | 18.9 | 19.3 | 18.8 | 20.1 | 18.5 | 1.0838 | 0.9472 | gi 635114810 | cyclin-dependent kinase 6                                                   |
| 18.2 | 17.9 | 17.3 | 17.6 | 17.9 | 18.0 | 0.9542 | 0.9494 | gi 635081775 | nuclear receptor-binding protein isoform X2                                 |
| 20.3 | 20.2 | 19.9 | 20.0 | 20.5 | 19.9 | 1.0351 | 0.9511 | gi 635054477 | nucleolar RNA helicase 2                                                    |
| 21.7 | 21.6 | 20.9 | 21.3 | 21.5 | 21.4 | 1.0390 | 0.9511 | gi 635143073 | ATP-dependent RNA helicase DDX3X isoform X2                                 |
| 24.6 | 23.8 | 24.1 | 24.3 | 23.9 | 24.2 | 0.9605 | 0.9514 | gi 635116388 | aldo-keto reductase family 1 member B10-like isoform X2                     |
| 21.3 | 22.6 | 22.2 | 22.4 | 22.0 | 21.7 | 1.0689 | 0.9517 | gi 635025887 | high mobility group protein B1-like                                         |
| 22.4 | 22.4 | 21.7 | 22.1 | 22.2 | 22.1 | 0.9659 | 0.9539 | gi 635031561 | elongation factor Tu, mitochondrial isoform X1                              |
| 22.6 | 22.9 | 22.2 | 22.5 | 22.9 | 22.2 | 0.9600 | 0.9539 | gi 635142791 | peroxiredoxin-4 isoform X3                                                  |
| 20.9 | 21.9 | 21.2 | 21.4 | 21.1 | 21.4 | 0.9589 | 0.9548 | gi 51863477  | glutamate dehydrogenase                                                     |
| 22.2 | 22.3 | 21.9 | 22.0 | 22.2 | 22.2 | 0.9824 | 0.9548 | gi 635121099 | dolichyl-diphosphooligosaccharide--protein glycosyltransferase subunit 1    |
| 26.3 | 26.6 | 26.7 | 26.3 | 26.5 | 26.8 | 0.9732 | 0.9550 | gi 635057707 | pyruvate kinase PKM                                                         |
| 17.7 | 17.9 | 17.2 | 17.0 | 17.9 | 17.8 | 0.9519 | 0.9552 | gi 635084409 | GMP synthase [glutamine-hydrolyzing] isoform X2                             |
| 22.1 | 22.7 | 22.6 | 22.5 | 22.4 | 22.6 | 1.0273 | 0.9555 | gi 635148055 | 60S ribosomal protein L3-like                                               |
| 22.7 | 23.4 | 22.3 | 22.5 | 23.2 | 22.8 | 1.0536 | 0.9558 | gi 635126093 | proteasome activator complex subunit 2                                      |
| 20.9 | 20.8 | 19.8 | 20.5 | 20.7 | 20.4 | 1.0503 | 0.9562 | gi 635057043 | ADP-ribosylation factor-like protein 3, partial                             |
| 25.5 | 25.5 | 24.8 | 25.2 | 25.4 | 25.2 | 1.0329 | 0.9564 | gi 635074112 | retinal dehydrogenase 1 isoform X2                                          |
| 20.8 | 22.1 | 21.3 | 21.4 | 21.8 | 21.0 | 0.9419 | 0.9565 | gi 635036057 | interleukin enhancer-binding factor 3 isoform X5                            |
| 18.1 | 18.7 | 18.4 | 18.0 | 18.6 | 18.6 | 0.9648 | 0.9568 | gi 635037644 | atherin                                                                     |
| 23.6 | 24.0 | 23.4 | 23.6 | 23.7 | 23.7 | 1.0243 | 0.9569 | gi 635038829 | alpha-actinin-4 isoform X1                                                  |
| 24.1 | 24.8 | 24.1 | 24.0 | 24.6 | 24.3 | 0.9640 | 0.9590 | gi 635066933 | nucleosome assembly protein 1-like 1 isoform X3                             |
| 20.2 | 21.0 | 20.5 | 20.5 | 20.6 | 20.6 | 1.0297 | 0.9599 | gi 635089234 | AP-2 complex subunit beta isoform X2                                        |

|      |      |      |      |      |      |        |        |              |                                                                    |
|------|------|------|------|------|------|--------|--------|--------------|--------------------------------------------------------------------|
| 20.2 | 20.5 | 19.9 | 20.2 | 20.4 | 20.0 | 1.0258 | 0.9601 | gi 635129401 | cytoplasmic dynein 1 heavy chain 1                                 |
| 23.3 | 24.1 | 23.8 | 23.5 | 24.0 | 23.7 | 0.9680 | 0.9614 | gi 635034515 | 60S ribosomal protein L13                                          |
| 18.2 | 18.9 | 18.3 | 17.9 | 18.9 | 18.6 | 0.9571 | 0.9620 | gi 635062207 | vigilin                                                            |
| 23.1 | 23.3 | 23.4 | 23.5 | 23.1 | 23.1 | 0.9798 | 0.9623 | gi 635073382 | 40S ribosomal protein S6                                           |
| 20.8 | 23.3 | 20.8 | 22.5 | 22.7 | 19.9 | 1.1500 | 0.9625 | gi 635022469 | peptidyl-prolyl cis-trans isomerase FKBP1A isoform X2              |
| 24.3 | 22.6 | 22.4 | 22.6 | 23.3 | 23.6 | 1.0782 | 0.9639 | gi 635136851 | actin, alpha cardiac muscle 1                                      |
| 20.0 | 21.1 | 20.7 | 20.8 | 21.2 | 19.8 | 1.0561 | 0.9657 | gi 635122334 | protein TFG isoform X4                                             |
| 15.0 | 15.4 | 14.6 | 14.2 | 15.9 | 14.8 | 0.9430 | 0.9658 | gi 635122941 | peroxisomal NADH pyrophosphatase NUdT12                            |
| 20.7 | 20.9 | 20.3 | 20.4 | 20.9 | 20.6 | 1.0251 | 0.9674 | gi 635138678 | grpE protein homolog 1, mitochondrial                              |
| 19.3 | 19.6 | 18.8 | 19.0 | 19.2 | 19.5 | 1.0262 | 0.9675 | gi 635019776 | proteasomal ubiquitin receptor ADRM1 isoform X2                    |
| 18.8 | 18.6 | 18.1 | 18.4 | 18.4 | 18.6 | 0.9791 | 0.9676 | gi 635139445 | NADPH--cytochrome P450 reductase isoform X4                        |
| 21.0 | 21.0 | 19.9 | 20.2 | 21.3 | 20.3 | 0.9523 | 0.9676 | gi 635030736 | calcium-regulated heat stable protein 1 isoform X2                 |
| 21.5 | 22.1 | 21.6 | 21.6 | 21.8 | 21.8 | 0.9827 | 0.9685 | gi 635133457 | fumarate hydratase, mitochondrial                                  |
| 18.6 | 19.6 | 19.4 | 19.5 | 19.0 | 19.1 | 1.0348 | 0.9698 | gi 635085309 | signal recognition particle receptor subunit beta                  |
| 15.1 | 14.9 | 14.6 | 14.6 | 15.0 | 15.1 | 0.9807 | 0.9700 | gi 635137065 | tight junction protein ZO-1 isoform X7                             |
| 22.2 | 22.8 | 22.2 | 22.1 | 22.4 | 22.7 | 0.9747 | 0.9700 | gi 635069556 | proliferation-associated protein 2G4                               |
| 21.7 | 22.9 | 22.6 | 22.4 | 22.7 | 22.0 | 0.9641 | 0.9705 | gi 635080709 | reticulon-4 isoform X4                                             |
| 16.6 | 15.6 | 14.7 | 13.9 | 16.5 | 16.3 | 0.9131 | 0.9707 | gi 635125506 | FAS-associated factor 2 isoform X2                                 |
| 13.8 | 14.2 | 13.5 | 12.9 | 14.6 | 14.1 | 1.0517 | 0.9707 | gi 635103147 | plexin-B2                                                          |
| 23.3 | 23.9 | 23.3 | 23.4 | 23.7 | 23.4 | 0.9813 | 0.9710 | gi 635021208 | proliferating cell nuclear antigen                                 |
| 17.0 | 16.8 | 16.3 | 16.3 | 17.0 | 16.8 | 0.9759 | 0.9711 | gi 635027240 | lysophosphatidylcholine acyltransferase 1                          |
| 17.1 | 17.1 | 16.4 | 16.4 | 17.6 | 16.7 | 1.0370 | 0.9717 | gi 635078596 | beta-centractin                                                    |
| 24.2 | 24.8 | 24.5 | 24.3 | 24.7 | 24.5 | 0.9833 | 0.9734 | gi 635087547 | eukaryotic initiation factor 4A-I                                  |
| 23.9 | 24.0 | 23.5 | 23.9 | 23.9 | 23.7 | 1.0130 | 0.9741 | gi 635092880 | importin subunit beta-1                                            |
| 16.6 | 19.1 | 18.9 | 18.1 | 18.2 | 18.3 | 1.0642 | 0.9750 | gi 635039935 | serine/threonine-protein phosphatase 5                             |
| 23.8 | 24.2 | 23.5 | 23.9 | 23.9 | 23.8 | 1.0163 | 0.9751 | gi 635060054 | elongation factor 1-beta                                           |
| 18.6 | 18.2 | 17.4 | 17.9 | 18.2 | 18.0 | 0.9729 | 0.9752 | gi 635100771 | catechol O-methyltransferase isoform X2                            |
| 24.5 | 24.9 | 24.1 | 24.5 | 24.5 | 24.5 | 1.0175 | 0.9755 | gi 635037961 | glucose-6-phosphate isomerase                                      |
| 21.1 | 21.0 | 20.4 | 20.6 | 21.2 | 20.8 | 1.0202 | 0.9759 | gi 635147935 | rab GDP dissociation inhibitor alpha                               |
| 12.5 | 15.1 | 13.3 | 12.9 | 15.0 | 13.1 | 1.0793 | 0.9760 | gi 635039688 | cleft lip and palate transmembrane protein 1 isoform X2            |
| 19.5 | 20.5 | 19.6 | 19.6 | 20.3 | 19.7 | 0.9734 | 0.9768 | gi 635027056 | programmed cell death protein 6 isoform X2                         |
| 16.9 | 17.2 | 17.0 | 17.0 | 18.9 | 15.2 | 1.0762 | 0.9772 | gi 635116602 | zinc finger CCCH-type antiviral protein 1-like                     |
| 15.8 | 18.2 | 15.4 | 15.4 | 16.8 | 17.2 | 0.9312 | 0.9778 | gi 635057488 | ATP-dependent RNA helicase DDX18                                   |
| 19.5 | 20.1 | 19.1 | 19.4 | 19.8 | 19.7 | 1.0199 | 0.9784 | gi 635059693 | basic leucine zipper and W2 domain-containing protein 1 isoform X2 |
| 18.6 | 17.6 | 16.6 | 17.5 | 18.3 | 17.2 | 1.0450 | 0.9786 | gi 635097408 | eukaryotic translation elongation factor 1 epsilon-1 isoform X3    |
| 18.0 | 18.5 | 17.7 | 17.7 | 18.1 | 18.3 | 0.9807 | 0.9787 | gi 635093852 | ATP-dependent RNA helicase DDX42                                   |
| 17.9 | 19.3 | 17.9 | 18.2 | 18.2 | 18.6 | 0.9693 | 0.9789 | gi 635140133 | ER lumen protein retaining receptor 2 isoform X2                   |
| 17.4 | 19.8 | 19.6 | 18.1 | 19.8 | 19.1 | 1.0617 | 0.9789 | gi 635056636 | mitotic checkpoint protein BUB3                                    |
| 18.3 | 19.7 | 19.0 | 18.9 | 19.3 | 18.7 | 1.0293 | 0.9792 | gi 635136357 | synaptosomal-associated protein 23                                 |
| 22.9 | 23.0 | 22.8 | 22.7 | 23.0 | 23.1 | 1.0091 | 0.9798 | gi 635079932 | T-complex protein 1 subunit eta isoform X1                         |
| 20.4 | 19.3 | 20.4 | 20.3 | 19.2 | 20.6 | 1.0371 | 0.9800 | gi 635139606 | mitochondrial fission 1 protein isoform X2                         |

|      |      |      |      |      |      |        |        |              |                                                                 |
|------|------|------|------|------|------|--------|--------|--------------|-----------------------------------------------------------------|
| 22.2 | 22.4 | 21.4 | 21.7 | 22.4 | 21.9 | 0.9790 | 0.9800 | gi 635067742 | thioredoxin reductase 1, cytoplasmic isoform X6                 |
| 18.0 | 18.6 | 18.2 | 18.6 | 18.1 | 18.1 | 0.9855 | 0.9804 | gi 635011814 | coronin-1B                                                      |
| 21.2 | 21.1 | 20.7 | 20.9 | 21.1 | 21.0 | 1.0086 | 0.9807 | gi 635058831 | obg-like ATPase 1 isoform X2                                    |
| 19.9 | 19.9 | 19.2 | 19.4 | 19.7 | 20.1 | 1.0186 | 0.9812 | gi 635067489 | phosphate carrier protein, mitochondrial                        |
| 19.7 | 19.1 | 20.3 | 19.5 | 19.8 | 19.8 | 0.9796 | 0.9815 | gi 635021798 | eukaryotic translation initiation factor 2 subunit 2 isoform X2 |
| 18.7 | 18.7 | 17.5 | 18.2 | 18.2 | 18.5 | 1.0210 | 0.9830 | gi 635030156 | phosphoglycolate phosphatase                                    |
| 22.0 | 22.5 | 21.4 | 21.8 | 22.1 | 22.0 | 0.9837 | 0.9833 | gi 635087281 | thioredoxin domain-containing protein 17                        |
| 20.4 | 20.6 | 19.3 | 19.9 | 20.4 | 20.0 | 1.0216 | 0.9835 | gi 635101885 | tRNA-splicing ligase RtcB homolog                               |
| 17.9 | 18.0 | 17.3 | 17.1 | 18.2 | 18.0 | 1.0213 | 0.9839 | gi 635042254 | mitochondrial import inner membrane translocase subunit TIM50   |
| 24.3 | 24.9 | 24.5 | 24.5 | 24.5 | 24.5 | 0.9918 | 0.9851 | gi 635137874 | UDP-glucose 6-dehydrogenase                                     |
| 25.4 | 25.8 | 25.5 | 25.6 | 25.6 | 25.6 | 0.9947 | 0.9851 | gi 635063994 | L-lactate dehydrogenase B chain                                 |
| 19.4 | 19.9 | 19.2 | 19.0 | 20.1 | 19.5 | 0.9833 | 0.9852 | gi 635066350 | methionine--tRNA ligase, cytoplasmic                            |
| 22.3 | 23.6 | 23.0 | 23.0 | 23.3 | 22.7 | 1.0185 | 0.9852 | gi 635021812 | adenosylhomocysteinase isoform X1                               |
| 22.4 | 22.9 | 22.3 | 22.5 | 22.7 | 22.4 | 0.9911 | 0.9858 | gi 635050818 | plectin isoform X26                                             |
| 21.1 | 21.0 | 20.2 | 20.2 | 21.5 | 20.6 | 1.0214 | 0.9858 | gi 635114726 | serum paraoxonase/arylesterase 2                                |
| 22.1 | 22.2 | 21.7 | 21.9 | 22.2 | 21.9 | 0.9917 | 0.9860 | gi 635123601 | heat shock 70 kDa protein 4 isoform X1                          |
| 22.9 | 23.4 | 22.7 | 23.1 | 23.1 | 22.9 | 1.0086 | 0.9861 | gi 635146405 | filamin-A isoform X2                                            |
| 16.5 | 19.2 | 18.8 | 19.0 | 16.3 | 19.1 | 0.9500 | 0.9867 | gi 635093500 | nuclear protein localization protein 4 homolog isoform X1       |
| 23.7 | 24.3 | 23.8 | 23.8 | 24.0 | 24.0 | 1.0078 | 0.9870 | gi 635125789 | calnexin                                                        |
| 14.6 | 16.5 | 15.6 | 16.5 | 14.7 | 15.5 | 1.0289 | 0.9880 | gi 635139694 | serrate RNA effector molecule homolog isoform X5                |
| 19.9 | 20.0 | 19.2 | 19.5 | 19.6 | 20.0 | 1.0087 | 0.9904 | gi 635056461 | eukaryotic translation initiation factor 3 subunit A isoform X2 |
| 18.3 | 19.7 | 18.5 | 18.8 | 19.6 | 18.1 | 0.9823 | 0.9904 | gi 635114253 | transmembrane glycoprotein NMB                                  |
| 21.1 | 21.5 | 21.0 | 21.1 | 21.2 | 21.3 | 1.0045 | 0.9904 | gi 635124468 | leucine--tRNA ligase, cytoplasmic isoform X1                    |
| 24.4 | 24.7 | 24.1 | 24.3 | 24.5 | 24.3 | 1.0051 | 0.9905 | gi 635102017 | myosin-9                                                        |
| 16.6 | 16.7 | 15.8 | 16.3 | 16.4 | 16.3 | 0.9922 | 0.9910 | gi 635121256 | solute carrier family 41 member 3 isoform X2                    |
| 22.3 | 22.2 | 21.3 | 21.9 | 22.0 | 21.9 | 0.9921 | 0.9914 | gi 635019580 | elongation factor 1-alpha 2                                     |
| 20.4 | 20.4 | 19.8 | 20.0 | 20.4 | 20.3 | 1.0056 | 0.9918 | gi 635064503 | dynamamin-1-like protein isoform X8                             |
| 17.7 | 18.1 | 17.3 | 17.6 | 17.9 | 17.7 | 0.9935 | 0.9919 | gi 635146494 | H/ACA ribonucleoprotein complex subunit 4                       |
| 13.7 | 15.2 | 13.7 | 13.2 | 14.3 | 15.0 | 0.9829 | 0.9923 | gi 635080906 | DNA mismatch repair protein Msh2                                |
| 16.9 | 17.6 | 17.0 | 16.5 | 17.7 | 17.4 | 1.0094 | 0.9926 | gi 635078797 | phosducin-like protein 3                                        |
| 19.7 | 19.4 | 19.0 | 19.2 | 19.6 | 19.4 | 0.9948 | 0.9927 | gi 635046858 | V-type proton ATPase subunit B, brain isoform                   |
| 19.7 | 20.1 | 18.9 | 19.2 | 19.8 | 19.6 | 0.9938 | 0.9949 | gi 635067027 | protein phosphatase 1 regulatory subunit 12A isoform X5         |
| 21.1 | 21.4 | 20.9 | 20.9 | 21.5 | 21.0 | 1.0037 | 0.9952 | gi 635018402 | hypoxia up-regulated protein 1 isoform X2                       |
| 18.9 | 19.4 | 19.0 | 18.6 | 19.7 | 19.1 | 1.0047 | 0.9956 | gi 635045445 | peptidyl-prolyl cis-trans isomerase D isoform X3                |
| 28.0 | 28.3 | 28.2 | 28.0 | 28.2 | 28.2 | 1.0012 | 0.9964 | gi 635113315 | peptidyl-prolyl cis-trans isomerase A isoform X1                |
| 20.9 | 19.7 | 18.7 | 20.2 | 20.3 | 18.8 | 1.0082 | 0.9967 | gi 635069584 | 60S ribosomal protein L6                                        |
| 23.8 | 23.9 | 23.5 | 23.6 | 23.6 | 23.9 | 0.9988 | 0.9973 | gi 635077830 | ezrin                                                           |
| 20.0 | 20.0 | 19.7 | 19.6 | 20.1 | 20.0 | 1.0015 | 0.9974 | gi 635086679 | glyoxalase domain-containing protein 4                          |
| 20.8 | 20.7 | 20.5 | 20.5 | 20.9 | 20.6 | 1.0012 | 0.9976 | gi 635138280 | cytosol aminopeptidase                                          |
| 18.8 | 19.3 | 18.3 | 18.3 | 19.1 | 19.0 | 0.9974 | 0.9978 | gi 635059233 | integrin alpha-V isoform X3                                     |
| 24.6 | 25.7 | 25.1 | 25.0 | 25.5 | 24.9 | 0.9978 | 0.9980 | gi 635124782 | 40S ribosomal protein S14 isoform X2                            |
